# Supplementary material
Source: PubMed Central journal article supplement (PMC8058297)

# SUPPLEMENTAL MATERIAL

## Supplemental Tables I-VIII Supplemental Figures I-III

**Supplemental Table I.** Number of participants in each CAC score group with baseline characteristics (if baseline characteristic had at least one missing value)

**Supplemental Table II.** Number of all CVD events, hard CVD events, all CHD events, hard CHD events, and all-cause mortality in each CAC group

**Supplemental Table III.** Number of participants with each cancer type by CAC score group

**Supplemental Table IV.** Full list of ICD-9 and ICD-10 codes used for non-CVD events

**Supplemental Table V.** Number of each specific non-CVD event type and aggregate non-CVD events in each CAC group

**Supplemental Table VI.** FOURIER low-risk subgroups with percentage of FOURIER placebo arm they represent, 3-year Kaplan-Meier rate as reported by FOURIER, and annualized event rate

**Supplemental Table VII.** “Tipping point” analysis showing p-value and number of events by years of follow-up time for all CHD events in the CAC 400-999 and CAC  $\geq$  1000 groups

**Supplemental Table VIII.** Hazard ratios for CVD events and all-cause mortality for CAC  $\geq$  1000 participants by number of ECC sites

**Supplemental Figure I.** Association between CAC score and multivariable-adjusted risk of hard CVD events and hard CHD events

**Supplemental Figure II.** Kaplan-Meier curve showing probability of all CHD events vs. years of follow-up time for the CAC 400-999 and CAC  $\geq$  1000 groups

**Supplemental Figure III.** Event rates (per 100 person-years) of CAC  $\geq$  1000 participants for all CVD events, hard CVD events, all CHD events, hard CHD events, and all-cause mortality by number of extra-coronary calcium (ECC) sites

**Supplemental Table I**

| <b>Baseline Demographic Characteristics</b> | <b>CAC 0</b> | <b>CAC 1-399</b> | <b>CAC 400-999</b> | <b>CAC <math>\geq</math> 1000</b> |
|---------------------------------------------|--------------|------------------|--------------------|-----------------------------------|
| Diabetes                                    | 3402         | 2714             | 419                | 255                               |
| LDL-cholesterol                             | 3361         | 2677             | 413                | 250                               |
| HDL-cholesterol                             | 3401         | 2713             | 419                | 255                               |
| Triglycerides                               | 3402         | 2715             | 419                | 255                               |
| Total cholesterol                           | 3402         | 2715             | 419                | 255                               |
| Cigarette smoking                           | 3401         | 2715             | 420                | 256                               |
| Family history of myocardial infarction     | 3233         | 2534             | 391                | 237                               |
| Metabolic syndrome                          | 3405         | 2716             | 419                | 255                               |
| ASCVD Risk Score                            | 3381         | 2703             | 419                | 254                               |
| Creatinine                                  | 3401         | 2714             | 419                | 255                               |
| eGFR (MDRD)                                 | 3401         | 2714             | 419                | 255                               |
| Albuminuria                                 | 3395         | 2710             | 417                | 253                               |
| CRP                                         | 3390         | 2700             | 417                | 255                               |

**Supplemental Table II**

| <b>Number of events</b> | <b>CAC 0</b> | <b>CAC 1-399</b> | <b>CAC 400-999</b> | <b>CAC <math>\geq</math> 1000</b> |
|-------------------------|--------------|------------------|--------------------|-----------------------------------|
| All CVD                 | 240          | 546              | 142                | 116                               |
| Hard CVD                | 189          | 398              | 99                 | 72                                |
| All CHD                 | 127          | 371              | 109                | 90                                |
| Hard CHD                | 101          | 264              | 72                 | 58                                |
| All-cause mortality     | 134          | 264              | 61                 | 59                                |

**Supplemental Table III**

| <b>Cancer Type</b>            | <b>CAC 0</b> | <b>CAC 1-399</b> | <b>CAC 400-999</b> | <b>CAC ≥ 1000</b> | <b>Total</b> |
|-------------------------------|--------------|------------------|--------------------|-------------------|--------------|
| No cancer                     | 3,052        | 2,263            | 326                | 173               | 5,814        |
| Breast                        | 46           | 41               | 11                 | 2                 | 100          |
| Prostate                      | 57           | 105              | 15                 | 25                | 202          |
| Lung                          | 37           | 63               | 18                 | 9                 | 127          |
| Colorectal                    | 35           | 43               | 5                  | 12                | 95           |
| Pancreas                      | 11           | 9                | 3                  | 0                 | 23           |
| Melanoma                      | 13           | 16               | 3                  | 1                 | 33           |
| Bladder                       | 8            | 7                | 1                  | 4                 | 20           |
| Uterine                       | 19           | 8                | 1                  | 0                 | 28           |
| Thyroid                       | 6            | 3                | 1                  | 0                 | 10           |
| Brain                         | 3            | 2                | 1                  | 0                 | 6            |
| Non-melanoma skin             | 16           | 28               | 6                  | 11                | 61           |
| Liver                         | 8            | 10               | 3                  | 1                 | 22           |
| Kidney                        | 10           | 14               | 2                  | 2                 | 28           |
| Ovarian                       | 5            | 7                | 1                  | 0                 | 13           |
| Lymphoma                      | 8            | 13               | 1                  | 2                 | 24           |
| Other gastrointestinal cancer | 11           | 15               | 4                  | 4                 | 34           |
| Cervical                      | 3            | 2                | 1                  | 0                 | 6            |
| Multiple myeloma              | 4            | 9                | 2                  | 3                 | 18           |
| Other cancers                 | 64           | 63               | 15                 | 8                 | 150          |
| <b>Total</b>                  | <b>3,416</b> | <b>2,721</b>     | <b>420</b>         | <b>257</b>        | <b>6,814</b> |

**Supplemental Table IV**

| Non-CVD Diagnosis of Interest | ICD code                          | Description                                                           |
|-------------------------------|-----------------------------------|-----------------------------------------------------------------------|
| Cancer                        | 140.0                             | Malignant neoplasm of upper lip, vermilion border                     |
|                               | 140.1                             | Malignant neoplasm of lower lip, vermilion border                     |
|                               | 140.3                             | Malignant neoplasm of upper lip, inner aspect                         |
|                               | 140.4                             | Malignant neoplasm of lower lip, inner aspect                         |
|                               | 140.5                             | Malignant neoplasm of lip, unspecified, inner aspect                  |
|                               | 140.6                             | Malignant neoplasm of commissure of lip                               |
|                               | 140.8                             | Malignant neoplasm of other sites of lip                              |
|                               | 140.9                             | Malignant neoplasm of lip, unspecified, vermilion border              |
|                               | 141.0                             | Malignant neoplasm of base of tongue                                  |
|                               | 141.1                             | Malignant neoplasm of dorsal surface of tongue                        |
|                               | 141.2                             | Malignant neoplasm of tip and lateral border of tongue                |
|                               | 141.3                             | Malignant neoplasm of ventral surface of tongue                       |
|                               | 141.4                             | Malignant neoplasm of anterior two-thirds of tongue, part unspecified |
|                               | 141.5                             | Malignant neoplasm of junctional zone of tongue                       |
|                               | 141.6                             | Malignant neoplasm of lingual tonsil                                  |
|                               | 141.8                             | Malignant neoplasm of other sites of tongue                           |
|                               | 141.9                             | Malignant neoplasm of tongue, unspecified                             |
|                               | 142.0                             | Malignant neoplasm of parotid gland                                   |
|                               | 142.1                             | Malignant neoplasm of submandibular gland                             |
|                               | 142.2                             | Malignant neoplasm of sublingual gland                                |
|                               | 142.8                             | Malignant neoplasm of other major salivary glands                     |
|                               | 142.9                             | Malignant neoplasm of salivary gland, unspecified                     |
|                               | 143.0                             | Malignant neoplasm of upper gum                                       |
|                               | 143.1                             | Malignant neoplasm of lower gum                                       |
|                               | 143.8                             | Malignant neoplasm of other sites of gum                              |
|                               | 143.9                             | Malignant neoplasm of gum, unspecified                                |
|                               | 144.0                             | Malignant neoplasm of anterior portion of floor of mouth              |
|                               | 144.1                             | Malignant neoplasm of lateral portion of floor of mouth               |
|                               | 144.8                             | Malignant neoplasm of other sites of floor of mouth                   |
|                               | 144.9                             | Malignant neoplasm of floor of mouth, part unspecified                |
|                               | 145.0                             | Malignant neoplasm of cheek mucosa                                    |
|                               | 145.1                             | Malignant neoplasm of vestibule of mouth                              |
|                               | 145.2                             | Malignant neoplasm of hard palate                                     |
| 145.3                         | Malignant neoplasm of soft palate |                                                                       |

|       |                                                                        |
|-------|------------------------------------------------------------------------|
| 145.4 | Malignant neoplasm of uvula                                            |
| 145.5 | Malignant neoplasm of palate, unspecified                              |
| 145.6 | Malignant neoplasm of retromolar area                                  |
| 145.8 | Malignant neoplasm of other specified parts of mouth                   |
| 145.9 | Malignant neoplasm of mouth, unspecified                               |
| 146.0 | Malignant neoplasm of tonsil                                           |
| 146.1 | Malignant neoplasm of tonsillar fossa                                  |
| 146.2 | Malignant neoplasm of tonsillar pillars (anterior) (posterior)         |
| 146.3 | Malignant neoplasm of vallecula epiglottica                            |
| 146.4 | Malignant neoplasm of anterior aspect of epiglottis                    |
| 146.5 | Malignant neoplasm of junctional region of oropharynx                  |
| 146.6 | Malignant neoplasm of lateral wall of oropharynx                       |
| 146.7 | Malignant neoplasm of posterior wall of oropharynx                     |
| 146.8 | Malignant neoplasm of other specified sites of oropharynx              |
| 146.9 | Malignant neoplasm of oropharynx, unspecified site                     |
| 147.0 | Malignant neoplasm of superior wall of nasopharynx                     |
| 147.1 | Malignant neoplasm of posterior wall of nasopharynx                    |
| 147.2 | Malignant neoplasm of lateral wall of nasopharynx                      |
| 147.3 | Malignant neoplasm of anterior wall of nasopharynx                     |
| 147.8 | Malignant neoplasm of other specified sites of nasopharynx             |
| 147.9 | Malignant neoplasm of nasopharynx, unspecified site                    |
| 148.0 | Malignant neoplasm of postcricoid region of hypopharynx                |
| 148.1 | Malignant neoplasm of pyriform sinus                                   |
| 148.2 | Malignant neoplasm of aryepiglottic fold, hypopharyngeal aspect        |
| 148.3 | Malignant neoplasm of posterior hypopharyngeal wall                    |
| 148.8 | Malignant neoplasm of other specified sites of hypopharynx             |
| 148.9 | Malignant neoplasm of hypopharynx, unspecified site                    |
| 149.0 | Malignant neoplasm of pharynx, unspecified                             |
| 149.1 | Malignant neoplasm of waldeyer's ring                                  |
| 149.8 | Malignant neoplasm of other sites within the lip and oral cavity       |
| 149.9 | Malignant neoplasm of ill-defined sites within the lip and oral cavity |

|       |                                                                 |
|-------|-----------------------------------------------------------------|
| 150.0 | Malignant neoplasm of cervical esophagus                        |
| 150.1 | Malignant neoplasm of thoracic esophagus                        |
| 150.2 | Malignant neoplasm of abdominal esophagus                       |
| 150.3 | Malignant neoplasm of upper third of esophagus                  |
| 150.4 | Malignant neoplasm of middle third of esophagus                 |
| 150.5 | Malignant neoplasm of lower third of esophagus                  |
| 150.8 | Malignant neoplasm of other specified part of esophagus         |
| 150.9 | Malignant neoplasm of esophagus, unspecified site               |
| 151.0 | Malignant neoplasm of cardia                                    |
| 151.1 | Malignant neoplasm of pylorus                                   |
| 151.2 | Malignant neoplasm of pyloric antrum                            |
| 151.3 | Malignant neoplasm of fundus of stomach                         |
| 151.4 | Malignant neoplasm of body of stomach                           |
| 151.5 | Malignant neoplasm of lesser curvature of stomach, unspecified  |
| 151.6 | Malignant neoplasm of greater curvature of stomach, unspecified |
| 151.8 | Malignant neoplasm of other specified sites of stomach          |
| 151.9 | Malignant neoplasm of stomach, unspecified site                 |
| 152.0 | Malignant neoplasm of duodenum                                  |
| 152.1 | Malignant neoplasm of jejunum                                   |
| 152.2 | Malignant neoplasm of ileum                                     |
| 152.3 | Malignant neoplasm of Meckel's diverticulum                     |
| 152.8 | Malignant neoplasm of other specified sites of small intestine  |
| 152.9 | Malignant neoplasm of small intestine, unspecified site         |
| 153.0 | Malignant neoplasm of hepatic flexure                           |
| 153.1 | Malignant neoplasm of transverse colon                          |
| 153.2 | Malignant neoplasm of descending colon                          |
| 153.3 | Malignant neoplasm of sigmoid colon                             |
| 153.4 | Malignant neoplasm of cecum                                     |
| 153.5 | Malignant neoplasm of appendix vermiformis                      |
| 153.6 | Malignant neoplasm of ascending colon                           |
| 153.7 | Malignant neoplasm of splenic flexure                           |
| 153.8 | Malignant neoplasm of other specified sites of large intestine  |
| 153.9 | Malignant neoplasm of colon, unspecified site                   |
| 154.0 | Malignant neoplasm of rectosigmoid junction                     |
| 154.1 | Malignant neoplasm of rectum                                    |

|       |                                                                                        |
|-------|----------------------------------------------------------------------------------------|
| 154.2 | Malignant neoplasm of anal canal                                                       |
| 154.3 | Malignant neoplasm of anus, unspecified site                                           |
| 154.8 | Malignant neoplasm of other sites of rectum, rectosigmoid junction, and anus           |
| 155.0 | Malignant neoplasm of liver, primary                                                   |
| 155.1 | Malignant neoplasm of intrahepatic bile ducts                                          |
| 155.2 | Malignant neoplasm of liver, not specified as primary or secondary                     |
| 156.0 | Malignant neoplasm of gallbladder                                                      |
| 156.1 | Malignant neoplasm of extrahepatic bile ducts                                          |
| 156.2 | Malignant neoplasm of ampulla of vater                                                 |
| 156.8 | Malignant neoplasm of other specified sites of gallbladder and extrahepatic bile ducts |
| 156.9 | Malignant neoplasm of biliary tract, part unspecified site                             |
| 157.0 | Malignant neoplasm of head of pancreas                                                 |
| 157.1 | Malignant neoplasm of body of pancreas                                                 |
| 157.2 | Malignant neoplasm of tail of pancreas                                                 |
| 157.3 | Malignant neoplasm of pancreatic duct                                                  |
| 157.4 | Malignant neoplasm of islets of langerhans                                             |
| 157.8 | Malignant neoplasm of other specified sites of pancreas                                |
| 157.9 | Malignant neoplasm of pancreas, part unspecified                                       |
| 158.0 | Malignant neoplasm of retroperitoneum                                                  |
| 158.8 | Malignant neoplasm of specified parts of peritoneum                                    |
| 158.9 | Malignant neoplasm of peritoneum, unspecified                                          |
| 159.0 | Malignant neoplasm of intestinal tract, part unspecified                               |
| 159.1 | Malignant neoplasm of spleen, not elsewhere classified                                 |
| 159.8 | Malignant neoplasm of other sites of digestive system and intra-abdominal organs       |
| 159.9 | Malignant neoplasm of ill-defined sites within the digestive organs and peritoneum     |
| 160.0 | Malignant neoplasm of nasal cavities                                                   |
| 160.1 | Malignant neoplasm of auditory tube, middle ear, and mastoid air cells                 |
| 160.2 | Malignant neoplasm of maxillary sinus                                                  |
| 160.3 | Malignant neoplasm of ethmoidal sinus                                                  |
| 160.4 | Malignant neoplasm of frontal sinus                                                    |
| 160.5 | Malignant neoplasm of sphenoidal sinus                                                 |
| 160.8 | Malignant neoplasm of other accessory sinuses                                          |
| 160.9 | Malignant neoplasm of accessory sinus, unspecified                                     |



|       |                                                                                          |
|-------|------------------------------------------------------------------------------------------|
| 161.0 | Malignant neoplasm of glottis                                                            |
| 161.1 | Malignant neoplasm of supraglottis                                                       |
| 161.2 | Malignant neoplasm of subglottis                                                         |
| 161.3 | Malignant neoplasm of laryngeal cartilages                                               |
| 161.8 | Malignant neoplasm of other specified sites of larynx                                    |
| 161.9 | Malignant neoplasm of larynx, unspecified                                                |
| 162.0 | Malignant neoplasm of trachea                                                            |
| 162.2 | Malignant neoplasm of main bronchus                                                      |
| 162.3 | Malignant neoplasm of upper lobe, bronchus or lung                                       |
| 162.4 | Malignant neoplasm of middle lobe, bronchus or lung                                      |
| 162.5 | Malignant neoplasm of lower lobe, bronchus or lung                                       |
| 162.8 | Malignant neoplasm of other parts of bronchus or lung                                    |
| 162.9 | Malignant neoplasm of bronchus and lung, unspecified                                     |
| 163.0 | Malignant neoplasm of parietal pleura                                                    |
| 163.1 | Malignant neoplasm of visceral pleura                                                    |
| 163.8 | Malignant neoplasm of other specified sites of pleura                                    |
| 163.9 | Malignant neoplasm of pleura, unspecified                                                |
| 164.0 | Malignant neoplasm of thymus                                                             |
| 164.1 | Malignant neoplasm of heart                                                              |
| 164.2 | Malignant neoplasm of anterior mediastinum                                               |
| 164.3 | Malignant neoplasm of posterior mediastinum                                              |
| 164.8 | Malignant neoplasm of other parts of mediastinum                                         |
| 164.9 | Malignant neoplasm of mediastinum, part unspecified                                      |
| 165.0 | Malignant neoplasm of upper respiratory tract, part unspecified                          |
| 165.8 | Malignant neoplasm of other sites within the respiratory system and intrathoracic organs |
| 165.9 | Malignant neoplasm of ill-defined sites within the respiratory system                    |
| 170.0 | Malignant neoplasm of bones of skull and face, except mandible                           |
| 170.1 | Malignant neoplasm of mandible                                                           |
| 170.2 | Malignant neoplasm of vertebral column, excluding sacrum and coccyx                      |
| 170.3 | Malignant neoplasm of ribs, sternum, and clavicle                                        |
| 170.4 | Malignant neoplasm of scapula and long bones of upper limb                               |
| 170.5 | Malignant neoplasm of short bones of upper limb                                          |
| 170.6 | Malignant neoplasm of pelvic bones, sacrum, and coccyx                                   |

|        |                                                                                          |
|--------|------------------------------------------------------------------------------------------|
| 170.7  | Malignant neoplasm of long bones of lower limb                                           |
| 170.8  | Malignant neoplasm of short bones of lower limb                                          |
| 170.9  | Malignant neoplasm of bone and articular cartilage, site unspecified                     |
| 171.0  | Malignant neoplasm of connective and other soft tissue of head, face, and neck           |
| 171.2  | Malignant neoplasm of connective and other soft tissue of upper limb, including shoulder |
| 171.3  | Malignant neoplasm of connective and other soft tissue of lower limb, including hip      |
| 171.4  | Malignant neoplasm of connective and other soft tissue of thorax                         |
| 171.5  | Malignant neoplasm of connective and other soft tissue of abdomen                        |
| 171.6  | Malignant neoplasm of connective and other soft tissue of pelvis                         |
| 171.7  | Malignant neoplasm of connective and other soft tissue of trunk, unspecified             |
| 171.8  | Malignant neoplasm of other specified sites of connective and other soft tissue          |
| 171.9  | Malignant neoplasm of connective and other soft tissue, site unspecified                 |
| 172.0  | Malignant melanoma of skin of lip                                                        |
| 172.1  | Malignant melanoma of skin of eyelid, including canthus                                  |
| 172.2  | Malignant melanoma of skin of ear and external auditory canal                            |
| 172.3  | Malignant melanoma of skin of other and unspecified parts of face                        |
| 172.4  | Malignant melanoma of skin of scalp and neck                                             |
| 172.5  | Malignant melanoma of skin of trunk, except scrotum                                      |
| 172.6  | Malignant melanoma of skin of upper limb, including shoulder                             |
| 172.7  | Malignant melanoma of skin of lower limb, including hip                                  |
| 172.8  | Malignant melanoma of other specified sites of skin                                      |
| 172.9  | Melanoma of skin, site unspecified                                                       |
| 173.00 | Unspecified malignant neoplasm of skin of lip                                            |
| 173.01 | Basal cell carcinoma of skin of lip                                                      |
| 173.02 | Squamous cell carcinoma of skin of lip                                                   |
| 173.09 | Other specified malignant neoplasm of skin of lip                                        |

|        |                                                                                   |
|--------|-----------------------------------------------------------------------------------|
| 173.10 | Unspecified malignant neoplasm of eyelid, including canthus                       |
| 173.11 | Basal cell carcinoma of eyelid, including canthus                                 |
| 173.12 | Squamous cell carcinoma of eyelid, including canthus                              |
| 173.19 | Other specified malignant neoplasm of eyelid, including canthus                   |
| 173.20 | Unspecified malignant neoplasm of skin of ear and external auditory canal         |
| 173.21 | Basal cell carcinoma of skin of ear and external auditory canal                   |
| 173.22 | Squamous cell carcinoma of skin of ear and external auditory canal                |
| 173.29 | Other specified malignant neoplasm of skin of ear and external auditory canal     |
| 173.30 | Unspecified malignant neoplasm of skin of other and unspecified parts of face     |
| 173.31 | Basal cell carcinoma of skin of other and unspecified parts of face               |
| 173.32 | Squamous cell carcinoma of skin of other and unspecified parts of face            |
| 173.39 | Other specified malignant neoplasm of skin of other and unspecified parts of face |
| 173.40 | Unspecified malignant neoplasm of scalp and skin of neck                          |
| 173.41 | Basal cell carcinoma of scalp and skin of neck                                    |
| 173.42 | Squamous cell carcinoma of scalp and skin of neck                                 |
| 173.49 | Other specified malignant neoplasm of scalp and skin of neck                      |
| 173.50 | Unspecified malignant neoplasm of skin of trunk, except scrotum                   |
| 173.51 | Basal cell carcinoma of skin of trunk, except scrotum                             |
| 173.52 | Squamous cell carcinoma of skin of trunk, except scrotum                          |
| 173.59 | Other specified malignant neoplasm of skin of trunk, except scrotum               |
| 173.60 | Unspecified malignant neoplasm of skin of upper limb, including shoulder          |
| 173.61 | Basal cell carcinoma of skin of upper limb, including shoulder                    |

|        |                                                                              |
|--------|------------------------------------------------------------------------------|
| 173.62 | Squamous cell carcinoma of skin of upper limb, including shoulder            |
| 173.69 | Other specified malignant neoplasm of skin of upper limb, including shoulder |
| 173.70 | Unspecified malignant neoplasm of skin of lower limb, including hip          |
| 173.71 | Basal cell carcinoma of skin of lower limb, including hip                    |
| 173.72 | Squamous cell carcinoma of skin of lower limb, including hip                 |
| 173.79 | Other specified malignant neoplasm of skin of lower limb, including hip      |
| 173.80 | Unspecified malignant neoplasm of other specified sites of skin              |
| 173.81 | Basal cell carcinoma of other specified sites of skin                        |
| 173.82 | Squamous cell carcinoma of other specified sites of skin                     |
| 173.89 | Other specified malignant neoplasm of other specified sites of skin          |
| 173.90 | Unspecified malignant neoplasm of skin, site unspecified                     |
| 173.91 | Basal cell carcinoma of skin, site unspecified                               |
| 173.92 | Squamous cell carcinoma of skin, site unspecified                            |
| 173.99 | Other specified malignant neoplasm of skin, site unspecified                 |
| 174.0  | Malignant neoplasm of nipple and areola of female breast                     |
| 174.1  | Malignant neoplasm of central portion of female breast                       |
| 174.2  | Malignant neoplasm of upper-inner quadrant of female breast                  |
| 174.3  | Malignant neoplasm of lower-inner quadrant of female breast                  |
| 174.4  | Malignant neoplasm of upper-outer quadrant of female breast                  |
| 174.5  | Malignant neoplasm of lower-outer quadrant of female breast                  |
| 174.6  | Malignant neoplasm of axillary tail of female breast                         |
| 174.8  | Malignant neoplasm of other specified sites of female breast                 |
| 174.9  | Malignant neoplasm of breast (female), unspecified                           |
| 175.0  | Malignant neoplasm of nipple and areola of male breast                       |
| 175.9  | Malignant neoplasm of other and unspecified sites of male breast             |

|       |                                                                      |
|-------|----------------------------------------------------------------------|
| 176.0 | Kaposi's sarcoma, skin                                               |
| 176.1 | Kaposi's sarcoma, soft tissue                                        |
| 176.2 | Kaposi's sarcoma, palate                                             |
| 176.3 | Kaposi's sarcoma, gastrointestinal sites                             |
| 176.4 | Kaposi's sarcoma, lung                                               |
| 176.5 | Kaposi's sarcoma, lymph nodes                                        |
| 176.8 | Kaposi's sarcoma, other specified sites                              |
| 176.9 | Kaposi's sarcoma, unspecified site                                   |
| 179.  | Malignant neoplasm of uterus, part unspecified                       |
| 180.0 | Malignant neoplasm of endocervix                                     |
| 180.1 | Malignant neoplasm of exocervix                                      |
| 180.8 | Malignant neoplasm of other specified sites of cervix                |
| 180.9 | Malignant neoplasm of cervix uteri, unspecified site                 |
| 181.  | Malignant neoplasm of placenta                                       |
| 182.0 | Malignant neoplasm of corpus uteri, except isthmus                   |
| 182.1 | Malignant neoplasm of isthmus                                        |
| 182.8 | Malignant neoplasm of other specified sites of body of uterus        |
| 183.0 | Malignant neoplasm of ovary                                          |
| 183.2 | Malignant neoplasm of fallopian tube                                 |
| 183.3 | Malignant neoplasm of broad ligament of uterus                       |
| 183.4 | Malignant neoplasm of parametrium                                    |
| 183.5 | Malignant neoplasm of round ligament of uterus                       |
| 183.8 | Malignant neoplasm of other specified sites of uterine adnexa        |
| 183.9 | Malignant neoplasm of uterine adnexa, unspecified site               |
| 184.0 | Malignant neoplasm of vagina                                         |
| 184.1 | Malignant neoplasm of labia majora                                   |
| 184.2 | Malignant neoplasm of labia minora                                   |
| 184.3 | Malignant neoplasm of clitoris                                       |
| 184.4 | Malignant neoplasm of vulva, unspecified site                        |
| 184.8 | Malignant neoplasm of other specified sites of female genital organs |
| 184.9 | Malignant neoplasm of female genital organ, site unspecified         |
| 185.  | Malignant neoplasm of prostate                                       |
| 186.0 | Malignant neoplasm of undescended testis                             |
| 186.9 | Malignant neoplasm of other and unspecified testis                   |
| 187.1 | Malignant neoplasm of prepuce                                        |

|       |                                                                                |
|-------|--------------------------------------------------------------------------------|
| 187.2 | Malignant neoplasm of glans penis                                              |
| 187.3 | Malignant neoplasm of body of penis                                            |
| 187.4 | Malignant neoplasm of penis, part unspecified                                  |
| 187.5 | Malignant neoplasm of epididymis                                               |
| 187.6 | Malignant neoplasm of spermatic cord                                           |
| 187.7 | Malignant neoplasm of scrotum                                                  |
| 187.8 | Malignant neoplasm of other specified sites of male genital organs             |
| 187.9 | Malignant neoplasm of male genital organ, site unspecified                     |
| 188.0 | Malignant neoplasm of trigone of urinary bladder                               |
| 188.1 | Malignant neoplasm of dome of urinary bladder                                  |
| 188.2 | Malignant neoplasm of lateral wall of urinary bladder                          |
| 188.3 | Malignant neoplasm of anterior wall of urinary bladder                         |
| 188.4 | Malignant neoplasm of posterior wall of urinary bladder                        |
| 188.5 | Malignant neoplasm of bladder neck                                             |
| 188.6 | Malignant neoplasm of ureteric orifice                                         |
| 188.7 | Malignant neoplasm of urachus                                                  |
| 188.8 | Malignant neoplasm of other specified sites of bladder                         |
| 188.9 | Malignant neoplasm of bladder, part unspecified                                |
| 189.0 | Malignant neoplasm of kidney, except pelvis                                    |
| 189.1 | Malignant neoplasm of renal pelvis                                             |
| 189.2 | Malignant neoplasm of ureter                                                   |
| 189.3 | Malignant neoplasm of urethra                                                  |
| 189.4 | Malignant neoplasm of paraurethral glands                                      |
| 189.8 | Malignant neoplasm of other specified sites of urinary organs                  |
| 189.9 | Malignant neoplasm of urinary organ, site unspecified                          |
| 190.0 | Malignant neoplasm of eyeball, except conjunctiva, cornea, retina, and choroid |
| 190.1 | Malignant neoplasm of orbit                                                    |
| 190.2 | Malignant neoplasm of lacrimal gland                                           |
| 190.3 | Malignant neoplasm of conjunctiva                                              |
| 190.4 | Malignant neoplasm of cornea                                                   |
| 190.5 | Malignant neoplasm of retina                                                   |
| 190.6 | Malignant neoplasm of choroid                                                  |
| 190.7 | Malignant neoplasm of lacrimal duct                                            |
| 190.8 | Malignant neoplasm of other specified sites of eye                             |
| 190.9 | Malignant neoplasm of eye, part unspecified                                    |

|       |                                                                                     |
|-------|-------------------------------------------------------------------------------------|
| 191.0 | Malignant neoplasm of cerebrum, except lobes and ventricles                         |
| 191.1 | Malignant neoplasm of frontal lobe                                                  |
| 191.2 | Malignant neoplasm of temporal lobe                                                 |
| 191.3 | Malignant neoplasm of parietal lobe                                                 |
| 191.4 | Malignant neoplasm of occipital lobe                                                |
| 191.5 | Malignant neoplasm of ventricles                                                    |
| 191.6 | Malignant neoplasm of cerebellum nos                                                |
| 191.7 | Malignant neoplasm of brain stem                                                    |
| 191.8 | Malignant neoplasm of other parts of brain                                          |
| 191.9 | Malignant neoplasm of brain, unspecified                                            |
| 192.0 | Malignant neoplasm of cranial nerves                                                |
| 192.1 | Malignant neoplasm of cerebral meninges                                             |
| 192.2 | Malignant neoplasm of spinal cord                                                   |
| 192.3 | Malignant neoplasm of spinal meninges                                               |
| 192.8 | Malignant neoplasm of other specified sites of nervous system                       |
| 192.9 | Malignant neoplasm of nervous system, part unspecified                              |
| 193.  | Malignant neoplasm of thyroid gland                                                 |
| 194.0 | Malignant neoplasm of adrenal gland                                                 |
| 194.1 | Malignant neoplasm of parathyroid gland                                             |
| 194.3 | Malignant neoplasm of pituitary gland and craniopharyngeal duct                     |
| 194.4 | Malignant neoplasm of pineal gland                                                  |
| 194.5 | Malignant neoplasm of carotid body                                                  |
| 194.6 | Malignant neoplasm of aortic body and other paraganglia                             |
| 194.8 | Malignant neoplasm of other endocrine glands and related structures                 |
| 194.9 | Malignant neoplasm of endocrine gland, site unspecified                             |
| 195.0 | Malignant neoplasm of head, face, and neck                                          |
| 195.1 | Malignant neoplasm of thorax                                                        |
| 195.2 | Malignant neoplasm of abdomen                                                       |
| 195.3 | Malignant neoplasm of pelvis                                                        |
| 195.4 | Malignant neoplasm of upper limb                                                    |
| 195.5 | Malignant neoplasm of lower limb                                                    |
| 195.8 | Malignant neoplasm of other specified sites                                         |
| 196.0 | Secondary and unspecified malignant neoplasm of lymph nodes of head, face, and neck |

|        |                                                                                               |
|--------|-----------------------------------------------------------------------------------------------|
| 196.1  | Secondary and unspecified malignant neoplasm of intrathoracic lymph nodes                     |
| 196.2  | Secondary and unspecified malignant neoplasm of intra-abdominal lymph nodes                   |
| 196.3  | Secondary and unspecified malignant neoplasm of lymph nodes of axilla and upper limb          |
| 196.5  | Secondary and unspecified malignant neoplasm of lymph nodes of inguinal region and lower limb |
| 196.6  | Secondary and unspecified malignant neoplasm of intrapelvic lymph nodes                       |
| 196.8  | Secondary and unspecified malignant neoplasm of lymph nodes of multiple sites                 |
| 196.9  | Secondary and unspecified malignant neoplasm of lymph nodes, site unspecified                 |
| 197.0  | Secondary malignant neoplasm of lung                                                          |
| 197.1  | Secondary malignant neoplasm of mediastinum                                                   |
| 197.2  | Secondary malignant neoplasm of pleura                                                        |
| 197.3  | Secondary malignant neoplasm of other respiratory organs                                      |
| 197.4  | Secondary malignant neoplasm of small intestine including duodenum                            |
| 197.5  | Secondary malignant neoplasm of large intestine and rectum                                    |
| 197.6  | Secondary malignant neoplasm of retroperitoneum and peritoneum                                |
| 197.7  | Malignant neoplasm of liver, secondary                                                        |
| 197.8  | Secondary malignant neoplasm of other digestive organs and spleen                             |
| 198.0  | Secondary malignant neoplasm of kidney                                                        |
| 198.1  | Secondary malignant neoplasm of other urinary organs                                          |
| 198.2  | Secondary malignant neoplasm of skin                                                          |
| 198.3  | Secondary malignant neoplasm of brain and spinal cord                                         |
| 198.4  | Secondary malignant neoplasm of other parts of nervous system                                 |
| 198.5  | Secondary malignant neoplasm of bone and bone marrow                                          |
| 198.6  | Secondary malignant neoplasm of ovary                                                         |
| 198.7  | Secondary malignant neoplasm of adrenal gland                                                 |
| 198.81 | Secondary malignant neoplasm of breast                                                        |



|        |                                                                                 |
|--------|---------------------------------------------------------------------------------|
| 198.82 | Secondary malignant neoplasm of genital organs                                  |
| 198.89 | Secondary malignant neoplasm of other specified sites                           |
| 199.0  | Disseminated malignant neoplasm without specification of site                   |
| 199.1  | Other malignant neoplasm without specification of site                          |
| 199.2  | Malignant neoplasm associated with transplant organ                             |
| 200.00 | Reticulosarcoma, unspecified site, extranodal and solid organ sites             |
| 200.01 | Reticulosarcoma, lymph nodes of head, face, and neck                            |
| 200.02 | Reticulosarcoma, intrathoracic lymph nodes                                      |
| 200.03 | Reticulosarcoma, intra-abdominal lymph nodes                                    |
| 200.04 | Reticulosarcoma, lymph nodes of axilla and upper limb                           |
| 200.05 | Reticulosarcoma, lymph nodes of inguinal region and lower limb                  |
| 200.06 | Reticulosarcoma, intrapelvic lymph nodes                                        |
| 200.07 | Reticulosarcoma, spleen                                                         |
| 200.08 | Reticulosarcoma, lymph nodes of multiple sites                                  |
| 200.10 | Lymphosarcoma, unspecified site, extranodal and solid organ sites               |
| 200.11 | Lymphosarcoma, lymph nodes of head, face, and neck                              |
| 200.12 | Lymphosarcoma, intrathoracic lymph nodes                                        |
| 200.13 | Lymphosarcoma, intra-abdominal lymph nodes                                      |
| 200.14 | Lymphosarcoma, lymph nodes of axilla and upper limb                             |
| 200.15 | Lymphosarcoma, lymph nodes of inguinal region and lower limb                    |
| 200.16 | Lymphosarcoma, intrapelvic lymph nodes                                          |
| 200.17 | Lymphosarcoma, spleen                                                           |
| 200.18 | Lymphosarcoma, lymph nodes of multiple sites                                    |
| 200.20 | Burkitt's tumor or lymphoma, unspecified site, extranodal and solid organ sites |
| 200.21 | Burkitt's tumor or lymphoma, lymph nodes of head, face, and neck                |
| 200.22 | Burkitt's tumor or lymphoma, intrathoracic lymph nodes                          |
| 200.23 | Burkitt's tumor or lymphoma, intra-abdominal lymph nodes                        |
| 200.24 | Burkitt's tumor or lymphoma, lymph nodes of axilla and upper limb               |
| 200.25 | Burkitt's tumor or lymphoma, lymph nodes of inguinal region and lower limb      |

|        |                                                                                             |
|--------|---------------------------------------------------------------------------------------------|
| 200.26 | Burkitt's tumor or lymphoma, intrapelvic lymph nodes                                        |
| 200.27 | Burkitt's tumor or lymphoma, spleen                                                         |
| 200.28 | Burkitt's tumor or lymphoma, lymph nodes of multiple sites                                  |
| 200.30 | Marginal zone lymphoma, unspecified site, extranodal and solid organ sites                  |
| 200.31 | Marginal zone lymphoma, lymph nodes of head, face, and neck                                 |
| 200.32 | Marginal zone lymphoma, intrathoracic lymph nodes                                           |
| 200.33 | Marginal zone lymphoma, intraabdominal lymph nodes                                          |
| 200.34 | Marginal zone lymphoma, lymph nodes of axilla and upper limb                                |
| 200.35 | Marginal zone lymphoma, lymph nodes of inguinal region and lower limb                       |
| 200.36 | Marginal zone lymphoma, intrapelvic lymph nodes                                             |
| 200.37 | Marginal zone lymphoma, spleen                                                              |
| 200.38 | Marginal zone lymphoma, lymph nodes of multiple sites                                       |
| 200.40 | Mantle cell lymphoma, unspecified site, extranodal and solid organ sites                    |
| 200.41 | Mantle cell lymphoma, lymph nodes of head, face, and neck                                   |
| 200.42 | Mantle cell lymphoma, intrathoracic lymph nodes                                             |
| 200.43 | Mantle cell lymphoma, intra-abdominal lymph nodes                                           |
| 200.44 | Mantle cell lymphoma, lymph nodes of axilla and upper limb                                  |
| 200.45 | Mantle cell lymphoma, lymph nodes of inguinal region and lower limb                         |
| 200.46 | Mantle cell lymphoma, intrapelvic lymph nodes                                               |
| 200.47 | Mantle cell lymphoma, spleen                                                                |
| 200.48 | Mantle cell lymphoma, lymph nodes of multiple sites                                         |
| 200.50 | Primary central nervous system lymphoma, unspecified site, extranodal and solid organ sites |
| 200.51 | Primary central nervous system lymphoma, lymph nodes of head, face, and neck                |
| 200.52 | Primary central nervous system lymphoma, intrathoracic lymph nodes                          |
| 200.53 | Primary central nervous system lymphoma, intra-abdominal lymph nodes                        |

|        |                                                                                        |
|--------|----------------------------------------------------------------------------------------|
| 200.54 | Primary central nervous system lymphoma, lymph nodes of axilla and upper limb          |
| 200.55 | Primary central nervous system lymphoma, lymph nodes of inguinal region and lower limb |
| 200.56 | Primary central nervous system lymphoma, intrapelvic lymph nodes                       |
| 200.57 | Primary central nervous system lymphoma, spleen                                        |
| 200.58 | Primary central nervous system lymphoma, lymph nodes of multiple sites                 |
| 200.60 | Anaplastic large cell lymphoma, unspecified site, extranodal and solid organ sites     |
| 200.61 | Anaplastic large cell lymphoma, lymph nodes of head, face, and neck                    |
| 200.62 | Anaplastic large cell lymphoma, intrathoracic lymph nodes                              |
| 200.63 | Anaplastic large cell lymphoma, intra-abdominal lymph nodes                            |
| 200.64 | Anaplastic large cell lymphoma, lymph nodes of axilla and upper limb                   |
| 200.65 | Anaplastic large cell lymphoma, lymph nodes of inguinal region and lower limb          |
| 200.66 | Anaplastic large cell lymphoma, intrapelvic lymph nodes                                |
| 200.67 | Anaplastic large cell lymphoma, spleen                                                 |
| 200.68 | Anaplastic large cell lymphoma, lymph nodes of multiple sites                          |
| 200.70 | Large cell lymphoma, unspecified site, extranodal and solid organ sites                |
| 200.71 | Large cell lymphoma, lymph nodes of head, face, and neck                               |
| 200.72 | Large cell lymphoma, intrathoracic lymph nodes                                         |
| 200.73 | Large cell lymphoma, intra-abdominal lymph nodes                                       |
| 200.74 | Large cell lymphoma, lymph nodes of axilla and upper limb                              |
| 200.75 | Large cell lymphoma, lymph nodes of inguinal region and lower limb                     |
| 200.76 | Large cell lymphoma, intrapelvic lymph nodes                                           |
| 200.77 | Large cell lymphoma, spleen                                                            |
| 200.78 | Large cell lymphoma, lymph nodes of multiple sites                                     |

|        |                                                                                                               |
|--------|---------------------------------------------------------------------------------------------------------------|
| 200.80 | Other named variants of lymphosarcoma and reticulosarcoma, unspecified site, extranodal and solid organ sites |
| 200.81 | Other named variants of lymphosarcoma and reticulosarcoma, lymph nodes of head, face, and neck                |
| 200.82 | Other named variants of lymphosarcoma and reticulosarcoma, intrathoracic lymph nodes                          |
| 200.83 | Other named variants of lymphosarcoma and reticulosarcoma, intra-abdominal lymph nodes                        |
| 200.84 | Other named variants of lymphosarcoma and reticulosarcoma, lymph nodes of axilla and upper limb               |
| 200.85 | Other named variants of lymphosarcoma and reticulosarcoma, lymph nodes of inguinal region and lower limb      |
| 200.86 | Other named variants of lymphosarcoma and reticulosarcoma, intrapelvic lymph nodes                            |
| 200.87 | Other named variants of lymphosarcoma and reticulosarcoma, spleen                                             |
| 200.88 | Other named variants of lymphosarcoma and reticulosarcoma, lymph nodes of multiple sites                      |
| 201.00 | Hodgkin's paragranuloma, unspecified site, extranodal and solid organ sites                                   |
| 201.01 | Hodgkin's paragranuloma, lymph nodes of head, face, and neck                                                  |
| 201.02 | Hodgkin's paragranuloma, intrathoracic lymph nodes                                                            |
| 201.03 | Hodgkin's paragranuloma, intra-abdominal lymph nodes                                                          |
| 201.04 | Hodgkin's paragranuloma, lymph nodes of axilla and upper limb                                                 |
| 201.05 | Hodgkin's paragranuloma, lymph nodes of inguinal region and lower limb                                        |
| 201.06 | Hodgkin's paragranuloma, intrapelvic lymph nodes                                                              |
| 201.07 | Hodgkin's paragranuloma, spleen                                                                               |
| 201.08 | Hodgkin's paragranuloma, lymph nodes of multiple sites                                                        |
| 201.10 | Hodgkin's granuloma, unspecified site, extranodal and solid organ sites                                       |
| 201.11 | Hodgkin's granuloma, lymph nodes of head, face, and neck                                                      |
| 201.12 | Hodgkin's granuloma, intrathoracic lymph nodes                                                                |
| 201.13 | Hodgkin's granuloma, intra-abdominal lymph nodes                                                              |

|        |                                                                                                             |
|--------|-------------------------------------------------------------------------------------------------------------|
| 201.14 | Hodgkin's granuloma, lymph nodes of axilla and upper limb                                                   |
| 201.15 | Hodgkin's granuloma, lymph nodes of inguinal region and lower limb                                          |
| 201.16 | Hodgkin's granuloma, intrapelvic lymph nodes                                                                |
| 201.17 | Hodgkin's granuloma, spleen                                                                                 |
| 201.18 | Hodgkin's granuloma, lymph nodes of multiple sites                                                          |
| 201.20 | Hodgkin's sarcoma, unspecified site, extranodal and solid organ sites                                       |
| 201.21 | Hodgkin's sarcoma, lymph nodes of head, face, and neck                                                      |
| 201.22 | Hodgkin's sarcoma, intrathoracic lymph nodes                                                                |
| 201.23 | Hodgkin's sarcoma, intra-abdominal lymph nodes                                                              |
| 201.24 | Hodgkin's sarcoma, lymph nodes of axilla and upper limb                                                     |
| 201.25 | Hodgkin's sarcoma, lymph nodes of inguinal region and lower limb                                            |
| 201.26 | Hodgkin's sarcoma, intrapelvic lymph nodes                                                                  |
| 201.27 | Hodgkin's sarcoma, spleen                                                                                   |
| 201.28 | Hodgkin's sarcoma, lymph nodes of multiple sites                                                            |
| 201.40 | Hodgkin's disease, lymphocytic-histiocytic predominance, unspecified site, extranodal and solid organ sites |
| 201.41 | Hodgkin's disease, lymphocytic-histiocytic predominance, lymph nodes of head, face, and neck                |
| 201.42 | Hodgkin's disease, lymphocytic-histiocytic predominance, intrathoracic lymph nodes                          |
| 201.43 | Hodgkin's disease, lymphocytic-histiocytic predominance, intra-abdominal lymph nodes                        |
| 201.44 | Hodgkin's disease, lymphocytic-histiocytic predominance, lymph nodes of axilla and upper limb               |
| 201.45 | Hodgkin's disease, lymphocytic-histiocytic predominance, lymph nodes of inguinal region and lower limb      |
| 201.46 | Hodgkin's disease, lymphocytic-histiocytic predominance, intrapelvic lymph nodes                            |
| 201.47 | Hodgkin's disease, lymphocytic-histiocytic predominance, spleen                                             |
| 201.48 | Hodgkin's disease, lymphocytic-histiocytic predominance, lymph nodes of multiple sites                      |

|        |                                                                                              |
|--------|----------------------------------------------------------------------------------------------|
| 201.50 | Hodgkin's disease, nodular sclerosis, unspecified site, extranodal and solid organ sites     |
| 201.51 | Hodgkin's disease, nodular sclerosis, lymph nodes of head, face, and neck                    |
| 201.52 | Hodgkin's disease, nodular sclerosis, intrathoracic lymph nodes                              |
| 201.53 | Hodgkin's disease, nodular sclerosis, intra-abdominal lymph nodes                            |
| 201.54 | Hodgkin's disease, nodular sclerosis, lymph nodes of axilla and upper limb                   |
| 201.55 | Hodgkin's disease, nodular sclerosis, lymph nodes of inguinal region and lower limb          |
| 201.56 | Hodgkin's disease, nodular sclerosis, intrapelvic lymph nodes                                |
| 201.57 | Hodgkin's disease, nodular sclerosis, spleen                                                 |
| 201.58 | Hodgkin's disease, nodular sclerosis, lymph nodes of multiple sites                          |
| 201.60 | Hodgkin's disease, mixed cellularity, unspecified site, extranodal and solid organ sites     |
| 201.61 | Hodgkin's disease, mixed cellularity, lymph nodes of head, face, and neck                    |
| 201.62 | Hodgkin's disease, mixed cellularity, intrathoracic lymph nodes                              |
| 201.63 | Hodgkin's disease, mixed cellularity, intra-abdominal lymph nodes                            |
| 201.64 | Hodgkin's disease, mixed cellularity, lymph nodes of axilla and upper limb                   |
| 201.65 | Hodgkin's disease, mixed cellularity, lymph nodes of inguinal region and lower limb          |
| 201.66 | Hodgkin's disease, mixed cellularity, intrapelvic lymph nodes                                |
| 201.67 | Hodgkin's disease, mixed cellularity, spleen                                                 |
| 201.68 | Hodgkin's disease, mixed cellularity, lymph nodes of multiple sites                          |
| 201.70 | Hodgkin's disease, lymphocytic depletion, unspecified site, extranodal and solid organ sites |
| 201.71 | Hodgkin's disease, lymphocytic depletion, lymph nodes of head, face, and neck                |

|        |                                                                                         |
|--------|-----------------------------------------------------------------------------------------|
| 201.72 | Hodgkin's disease, lymphocytic depletion, intrathoracic lymph nodes                     |
| 201.73 | Hodgkin's disease, lymphocytic depletion, intra-abdominal lymph nodes                   |
| 201.74 | Hodgkin's disease, lymphocytic depletion, lymph nodes of axilla and upper limb          |
| 201.75 | Hodgkin's disease, lymphocytic depletion, lymph nodes of inguinal region and lower limb |
| 201.76 | Hodgkin's disease, lymphocytic depletion, intrapelvic lymph nodes                       |
| 201.77 | Hodgkin's disease, lymphocytic depletion, spleen                                        |
| 201.78 | Hodgkin's disease, lymphocytic depletion, lymph nodes of multiple sites                 |
| 201.90 | Hodgkin's disease, unspecified type, unspecified site, extranodal and solid organ sites |
| 201.91 | Hodgkin's disease, unspecified type, lymph nodes of head, face, and neck                |
| 201.92 | Hodgkin's disease, unspecified type, intrathoracic lymph nodes                          |
| 201.93 | Hodgkin's disease, unspecified type, intra-abdominal lymph nodes                        |
| 201.94 | Hodgkin's disease, unspecified type, lymph nodes of axilla and upper limb               |
| 201.95 | Hodgkin's disease, unspecified type, lymph nodes of inguinal region and lower limb      |
| 201.96 | Hodgkin's disease, unspecified type, intrapelvic lymph nodes                            |
| 201.97 | Hodgkin's disease, unspecified type, spleen                                             |
| 201.98 | Hodgkin's disease, unspecified type, lymph nodes of multiple sites                      |
| 202.00 | Nodular lymphoma, unspecified site, extranodal and solid organ sites                    |
| 202.01 | Nodular lymphoma, lymph nodes of head, face, and neck                                   |
| 202.02 | Nodular lymphoma, intrathoracic lymph nodes                                             |
| 202.03 | Nodular lymphoma, intra-abdominal lymph nodes                                           |
| 202.04 | Nodular lymphoma, lymph nodes of axilla and upper limb                                  |
| 202.05 | Nodular lymphoma, lymph nodes of inguinal region and lower limb                         |

|        |                                                                             |
|--------|-----------------------------------------------------------------------------|
| 202.06 | Nodular lymphoma, intrapelvic lymph nodes                                   |
| 202.07 | Nodular lymphoma, spleen                                                    |
| 202.08 | Nodular lymphoma, lymph nodes of multiple sites                             |
| 202.10 | Mycosis fungoides, unspecified site, extranodal and solid organ sites       |
| 202.11 | Mycosis fungoides, lymph nodes of head, face, and neck                      |
| 202.12 | Mycosis fungoides, intrathoracic lymph nodes                                |
| 202.13 | Mycosis fungoides, intra-abdominal lymph nodes                              |
| 202.14 | Mycosis fungoides, lymph nodes of axilla and upper limb                     |
| 202.15 | Mycosis fungoides, lymph nodes of inguinal region and lower limb            |
| 202.16 | Mycosis fungoides, intrapelvic lymph nodes                                  |
| 202.17 | Mycosis fungoides, spleen                                                   |
| 202.18 | Mycosis fungoides, lymph nodes of multiple sites                            |
| 202.20 | Sezary's disease, unspecified site, extranodal and solid organ sites        |
| 202.21 | Sezary's disease, lymph nodes of head, face, and neck                       |
| 202.22 | Sezary's disease, intrathoracic lymph nodes                                 |
| 202.23 | Sezary's disease, intra-abdominal lymph nodes                               |
| 202.24 | Sezary's disease, lymph nodes of axilla and upper limb                      |
| 202.25 | Sezary's disease, lymph nodes of inguinal region and lower limb             |
| 202.26 | Sezary's disease, intrapelvic lymph nodes                                   |
| 202.27 | Sezary's disease, spleen                                                    |
| 202.28 | Sezary's disease, lymph nodes of multiple sites                             |
| 202.30 | Malignant histiocytosis, unspecified site, extranodal and solid organ sites |
| 202.31 | Malignant histiocytosis, lymph nodes of head, face, and neck                |
| 202.32 | Malignant histiocytosis, intrathoracic lymph nodes                          |
| 202.33 | Malignant histiocytosis, intra-abdominal lymph nodes                        |
| 202.34 | Malignant histiocytosis, lymph nodes of axilla and upper limb               |
| 202.35 | Malignant histiocytosis, lymph nodes of inguinal region and lower limb      |
| 202.36 | Malignant histiocytosis, intrapelvic lymph nodes                            |
| 202.37 | Malignant histiocytosis, spleen                                             |
| 202.38 | Malignant histiocytosis, lymph nodes of multiple sites                      |



|        |                                                                                    |
|--------|------------------------------------------------------------------------------------|
| 202.40 | Leukemic reticuloendotheliosis, unspecified site, extranodal and solid organ sites |
| 202.41 | Leukemic reticuloendotheliosis, lymph nodes of head, face, and neck                |
| 202.42 | Leukemic reticuloendotheliosis, intrathoracic lymph nodes                          |
| 202.43 | Leukemic reticuloendotheliosis, intra-abdominal lymph nodes                        |
| 202.44 | Leukemic reticuloendotheliosis, lymph nodes of axilla and upper arm                |
| 202.45 | Leukemic reticuloendotheliosis, lymph nodes of inguinal region and lower limb      |
| 202.46 | Leukemic reticuloendotheliosis, intrapelvic lymph nodes                            |
| 202.47 | Leukemic reticuloendotheliosis, spleen                                             |
| 202.48 | Leukemic reticuloendotheliosis, lymph nodes of multiple sites                      |
| 202.50 | Letterer-siwe disease, unspecified site, extranodal and solid organ sites          |
| 202.51 | Letterer-siwe disease, lymph nodes of head, face, and neck                         |
| 202.52 | Letterer-siwe disease, intrathoracic lymph nodes                                   |
| 202.53 | Letterer-siwe disease, intra-abdominal lymph nodes                                 |
| 202.54 | Letterer-siwe disease, lymph nodes of axilla and upper limb                        |
| 202.55 | Letterer-siwe disease, lymph nodes of inguinal region and lower limb               |
| 202.56 | Letterer-siwe disease, intrapelvic lymph nodes                                     |
| 202.57 | Letterer-siwe disease, spleen                                                      |
| 202.58 | Letterer-siwe disease, lymph nodes of multiple sites                               |
| 202.60 | Malignant mast cell tumors, unspecified site, extranodal and solid organ sites     |
| 202.61 | Malignant mast cell tumors, lymph nodes of head, face, and neck                    |
| 202.62 | Malignant mast cell tumors, intrathoracic lymph nodes                              |
| 202.63 | Malignant mast cell tumors, intra-abdominal lymph nodes                            |
| 202.64 | Malignant mast cell tumors, lymph nodes of axilla and upper limb                   |

|        |                                                                                                                                  |
|--------|----------------------------------------------------------------------------------------------------------------------------------|
| 202.65 | Malignant mast cell tumors, lymph nodes of inguinal region and lower limb                                                        |
| 202.66 | Malignant mast cell tumors, intrapelvic lymph nodes                                                                              |
| 202.67 | Malignant mast cell tumors, spleen                                                                                               |
| 202.68 | Malignant mast cell tumors, lymph nodes of multiple sites                                                                        |
| 202.70 | Peripheral T cell lymphoma, unspecified site, extranodal and solid organ sites                                                   |
| 202.71 | Peripheral T cell lymphoma, lymph nodes of head, face, and neck                                                                  |
| 202.72 | Peripheral T cell lymphoma, intrathoracic lymph nodes                                                                            |
| 202.73 | Peripheral T cell lymphoma, intra-abdominal lymph nodes                                                                          |
| 202.74 | Peripheral T cell lymphoma, lymph nodes of axilla and upper limb                                                                 |
| 202.75 | Peripheral T cell lymphoma, lymph nodes of inguinal region and lower limb                                                        |
| 202.76 | Peripheral T cell lymphoma, intrapelvic lymph nodes                                                                              |
| 202.77 | Peripheral T cell lymphoma, spleen                                                                                               |
| 202.78 | Peripheral T cell lymphoma, lymph nodes of multiple sites                                                                        |
| 202.80 | Other malignant lymphomas, unspecified site, extranodal and solid organ sites                                                    |
| 202.81 | Other malignant lymphomas, lymph nodes of head, face, and neck                                                                   |
| 202.82 | Other malignant lymphomas, intrathoracic lymph nodes                                                                             |
| 202.83 | Other malignant lymphomas, intra-abdominal lymph nodes                                                                           |
| 202.84 | Other malignant lymphomas, lymph nodes of axilla and upper limb                                                                  |
| 202.85 | Other malignant lymphomas, lymph nodes of inguinal region and lower limb                                                         |
| 202.86 | Other malignant lymphomas, intrapelvic lymph nodes                                                                               |
| 202.87 | Other malignant lymphomas, spleen                                                                                                |
| 202.88 | Other malignant lymphomas, lymph nodes of multiple sites                                                                         |
| 202.90 | Other and unspecified malignant neoplasms of lymphoid and histiocytic tissue, unspecified site, extranodal and solid organ sites |

|        |                                                                                                                             |
|--------|-----------------------------------------------------------------------------------------------------------------------------|
| 202.91 | Other and unspecified malignant neoplasms of lymphoid and histiocytic tissue, lymph nodes of head, face, and neck           |
| 202.92 | Other and unspecified malignant neoplasms of lymphoid and histiocytic tissue, intrathoracic lymph nodes                     |
| 202.93 | Other and unspecified malignant neoplasms of lymphoid and histiocytic tissue, intra-abdominal lymph nodes                   |
| 202.94 | Other and unspecified malignant neoplasms of lymphoid and histiocytic tissue, lymph nodes of axilla and upper limb          |
| 202.95 | Other and unspecified malignant neoplasms of lymphoid and histiocytic tissue, lymph nodes of inguinal region and lower limb |
| 202.96 | Other and unspecified malignant neoplasms of lymphoid and histiocytic tissue, intrapelvic lymph nodes                       |
| 202.97 | Other and unspecified malignant neoplasms of lymphoid and histiocytic tissue, spleen                                        |
| 202.98 | Other and unspecified malignant neoplasms of lymphoid and histiocytic tissue, lymph nodes of multiple sites                 |
| 203.00 | Multiple myeloma, without mention of having achieved remission                                                              |
| 203.01 | Multiple myeloma, in remission                                                                                              |
| 203.02 | Multiple myeloma, in relapse                                                                                                |
| 203.10 | Plasma cell leukemia, without mention of having achieved remission                                                          |
| 203.11 | Plasma cell leukemia, in remission                                                                                          |
| 203.12 | Plasma cell leukemia, in relapse                                                                                            |
| 203.80 | Other immunoproliferative neoplasms, without mention of having achieved remission                                           |
| 203.81 | Other immunoproliferative neoplasms, in remission                                                                           |
| 203.82 | Other immunoproliferative neoplasms, in relapse                                                                             |
| 204.00 | Acute lymphoid leukemia, without mention of having achieved remission                                                       |
| 204.01 | Acute lymphoid leukemia, in remission                                                                                       |
| 204.02 | Acute lymphoid leukemia, in relapse                                                                                         |
| 204.10 | Chronic lymphoid leukemia, without mention of having achieved remission                                                     |
| 204.11 | Chronic lymphoid leukemia, in remission                                                                                     |
| 204.12 | Chronic lymphoid leukemia, in relapse                                                                                       |

|        |                                                                             |
|--------|-----------------------------------------------------------------------------|
| 204.20 | Subacute lymphoid leukemia, without mention of having achieved remission    |
| 204.21 | Subacute lymphoid leukemia, in remission                                    |
| 204.22 | Subacute lymphoid leukemia, in relapse                                      |
| 204.80 | Other lymphoid leukemia, without mention of having achieved remission       |
| 204.81 | Other lymphoid leukemia, in remission                                       |
| 204.82 | Other lymphoid leukemia, in relapse                                         |
| 204.90 | Unspecified lymphoid leukemia, without mention of having achieved remission |
| 204.91 | Unspecified lymphoid leukemia, in remission                                 |
| 204.92 | Unspecified lymphoid leukemia, in relapse                                   |
| 205.00 | Acute myeloid leukemia, without mention of having achieved remission        |
| 205.01 | Acute myeloid leukemia, in remission                                        |
| 205.02 | Acute myeloid leukemia, in relapse                                          |
| 205.10 | Chronic myeloid leukemia, without mention of having achieved remission      |
| 205.11 | Chronic myeloid leukemia, in remission                                      |
| 205.12 | Chronic myeloid leukemia, in relapse                                        |
| 205.20 | Subacute myeloid leukemia, without mention of having achieved remission     |
| 205.21 | Subacute myeloid leukemia, in remission                                     |
| 205.22 | Subacute myeloid leukemia, in relapse                                       |
| 205.30 | Myeloid sarcoma, without mention of having achieved remission               |
| 205.31 | Myeloid sarcoma, in remission                                               |
| 205.32 | Myeloid sarcoma, in relapse                                                 |
| 205.80 | Other myeloid leukemia, without mention of having achieved remission        |
| 205.81 | Other myeloid leukemia, in remission                                        |
| 205.82 | Other myeloid leukemia, in relapse                                          |
| 205.90 | Unspecified myeloid leukemia, without mention of having achieved remission  |
| 205.91 | Unspecified myeloid leukemia, in remission                                  |
| 205.92 | Unspecified myeloid leukemia, in relapse                                    |
| 206.00 | Acute monocytic leukemia, without mention of having achieved remission      |
| 206.01 | Acute monocytic leukemia, in remission                                      |

|        |                                                                                         |
|--------|-----------------------------------------------------------------------------------------|
| 206.02 | Acute monocytic leukemia, in relapse                                                    |
| 206.10 | Chronic monocytic leukemia, without mention of having achieved remission                |
| 206.11 | Chronic monocytic leukemia, in remission                                                |
| 206.12 | Chronic monocytic leukemia, in relapse                                                  |
| 206.20 | Subacute monocytic leukemia, without mention of having achieved remission               |
| 206.21 | Subacute monocytic leukemia, in remission                                               |
| 206.22 | Subacute monocytic leukemia, in relapse                                                 |
| 206.80 | Other monocytic leukemia, without mention of having achieved remission                  |
| 206.81 | Other monocytic leukemia, in remission                                                  |
| 206.82 | Other monocytic leukemia, in relapse                                                    |
| 206.90 | Unspecified monocytic leukemia, without mention of having achieved remission            |
| 206.91 | Unspecified monocytic leukemia, in remission                                            |
| 206.92 | Unspecified monocytic leukemia, in relapse                                              |
| 207.00 | Acute erythremia and erythroleukemia, without mention of having achieved remission      |
| 207.01 | Acute erythremia and erythroleukemia, in remission                                      |
| 207.02 | Acute erythremia and erythroleukemia, in relapse                                        |
| 207.10 | Chronic erythremia, without mention of having achieved remission                        |
| 207.11 | Chronic erythremia, in remission                                                        |
| 207.12 | Chronic erythremia, in relapse                                                          |
| 207.20 | Megakaryocytic leukemia, without mention of having achieved remission                   |
| 207.21 | Megakaryocytic leukemia, in remission                                                   |
| 207.22 | Megakaryocytic leukemia, in relapse                                                     |
| 207.80 | Other specified leukemia, without mention of having achieved remission                  |
| 207.81 | Other specified leukemia, in remission                                                  |
| 207.82 | Other specified leukemia, in relapse                                                    |
| 208.00 | Acute leukemia of unspecified cell type, without mention of having achieved remission   |
| 208.01 | Acute leukemia of unspecified cell type, in remission                                   |
| 208.02 | Acute leukemia of unspecified cell type, in relapse                                     |
| 208.10 | Chronic leukemia of unspecified cell type, without mention of having achieved remission |

|        |                                                                                             |
|--------|---------------------------------------------------------------------------------------------|
| 208.11 | Chronic leukemia of unspecified cell type, in remission                                     |
| 208.12 | Chronic leukemia of unspecified cell type, in relapse                                       |
| 208.20 | Subacute leukemia of unspecified cell type, without mention of having achieved remission    |
| 208.21 | Subacute leukemia of unspecified cell type, in remission                                    |
| 208.22 | Subacute leukemia of unspecified cell type, in relapse                                      |
| 208.80 | Other leukemia of unspecified cell type, without mention of having achieved remission       |
| 208.81 | Other leukemia of unspecified cell type, in remission                                       |
| 208.82 | Other leukemia of unspecified cell type, in relapse                                         |
| 208.90 | Unspecified leukemia, without mention of having achieved remission                          |
| 208.91 | Unspecified leukemia, in remission                                                          |
| 208.92 | Unspecified leukemia, in relapse                                                            |
| V10.00 | Personal history of malignant neoplasm of gastrointestinal tract, unspecified               |
| V10.01 | Personal history of malignant neoplasm of tongue                                            |
| V10.02 | Personal history of malignant neoplasm of other and unspecified oral cavity and pharynx     |
| V10.03 | Personal history of malignant neoplasm of esophagus                                         |
| V10.04 | Personal history of malignant neoplasm of stomach                                           |
| V10.05 | Personal history of malignant neoplasm of large intestine                                   |
| V10.06 | Personal history of malignant neoplasm of rectum, rectosigmoid junction, and anus           |
| V10.07 | Personal history of malignant neoplasm of liver                                             |
| V10.09 | Personal history of malignant neoplasm of other gastrointestinal tract                      |
| V10.11 | Personal history of malignant neoplasm of bronchus and lung                                 |
| V10.12 | Personal history of malignant neoplasm of trachea                                           |
| V10.20 | Personal history of malignant neoplasm of respiratory organ, unspecified                    |
| V10.21 | Personal history of malignant neoplasm of larynx                                            |
| V10.22 | Personal history of malignant neoplasm of nasal cavities, middle ear, and accessory sinuses |
| V10.29 | Personal history of malignant neoplasm of other respiratory and intrathoracic organs        |
| V10.3  | Personal history of malignant neoplasm of breast                                            |

|        |                                                                             |
|--------|-----------------------------------------------------------------------------|
| V10.40 | Personal history of malignant neoplasm of female genital organ, unspecified |
| V10.41 | Personal history of malignant neoplasm of cervix uteri                      |
| V10.42 | Personal history of malignant neoplasm of other parts of uterus             |
| V10.43 | Personal history of malignant neoplasm of ovary                             |
| V10.44 | Personal history of malignant neoplasm of other female genital organs       |
| V10.45 | Personal history of malignant neoplasm of male genital organ, unspecified   |
| V10.46 | Personal history of malignant neoplasm of prostate                          |
| V10.47 | Personal history of malignant neoplasm of testis                            |
| V10.48 | Personal history of malignant neoplasm of epididymis                        |
| V10.49 | Personal history of malignant neoplasm of other male genital organs         |
| V10.50 | Personal history of malignant neoplasm of urinary organ, unspecified        |
| V10.51 | Personal history of malignant neoplasm of bladder                           |
| V10.52 | Personal history of malignant neoplasm of kidney                            |
| V10.53 | Personal history of malignant neoplasm of renal pelvis                      |
| V10.59 | Personal history of malignant neoplasm of other urinary organs              |
| V10.60 | Personal history of leukemia, unspecified                                   |
| V10.61 | Personal history of lymphoid leukemia                                       |
| V10.62 | Personal history of myeloid leukemia                                        |
| V10.63 | Personal history of monocytic leukemia                                      |
| V10.69 | Personal history of other leukemia                                          |
| V10.71 | Personal history of lymphosarcoma and reticulosarcoma                       |
| V10.72 | Personal history of hodgkin's disease                                       |
| V10.79 | Personal history of other lymphatic and hematopoietic neoplasms             |
| V10.81 | Personal history of malignant neoplasm of bone                              |
| V10.82 | Personal history of malignant melanoma of skin                              |
| V10.83 | Personal history of other malignant neoplasm of skin                        |
| V10.84 | Personal history of malignant neoplasm of eye                               |
| V10.85 | Personal history of malignant neoplasm of brain                             |
| V10.86 | Personal history of malignant neoplasm of other parts of nervous system     |
| V10.87 | Personal history of malignant neoplasm of thyroid                           |

|        |                                                                                         |
|--------|-----------------------------------------------------------------------------------------|
| V10.88 | Personal history of malignant neoplasm of other endocrine glands and related structures |
| V10.89 | Personal history of malignant neoplasm of other sites                                   |
| V10.90 | Personal history of unspecified malignant neoplasm                                      |
| V10.91 | Personal history of malignant neuroendocrine tumor                                      |
| C00.   | Malignant neoplasm of lip                                                               |
| C00.0  | Malignant neoplasm of external upper lip                                                |
| C00.1  | Malignant neoplasm of external lower lip                                                |
| C00.2  | Malignant neoplasm of external lip, unspecified                                         |
| C00.3  | Malignant neoplasm of upper lip, inner aspect                                           |
| C00.4  | Malignant neoplasm of lower lip, inner aspect                                           |
| C00.5  | Malignant neoplasm of lip, unspecified, inner aspect                                    |
| C00.6  | Malignant neoplasm of commissure of lip, unspecified                                    |
| C00.8  | Malignant neoplasm of overlapping sites of lip                                          |
| C00.9  | Malignant neoplasm of lip, unspecified                                                  |
| C01.   | Malignant neoplasm of base of tongue                                                    |
| C02.   | Malignant neoplasm of other and unspecified parts of tongue                             |
| C02.0  | Malignant neoplasm of dorsal surface of tongue                                          |
| C02.1  | Malignant neoplasm of border of tongue                                                  |
| C02.2  | Malignant neoplasm of ventral surface of tongue                                         |
| C02.3  | Malignant neoplasm of anterior two-thirds of tongue, part unspecified                   |
| C02.4  | Malignant neoplasm of lingual tonsil                                                    |
| C02.8  | Malignant neoplasm of overlapping sites of tongue                                       |
| C02.9  | Malignant neoplasm of tongue, unspecified                                               |
| C03.   | Malignant neoplasm of gum                                                               |
| C03.0  | Malignant neoplasm of upper gum                                                         |
| C03.1  | Malignant neoplasm of lower gum                                                         |
| C03.9  | Malignant neoplasm of gum, unspecified                                                  |
| C04.   | Malignant neoplasm of floor of mouth                                                    |
| C04.0  | Malignant neoplasm of anterior floor of mouth                                           |
| C04.1  | Malignant neoplasm of lateral floor of mouth                                            |
| C04.8  | Malignant neoplasm of overlapping sites of floor of mouth                               |
| C04.9  | Malignant neoplasm of floor of mouth, unspecified                                       |
| C05.   | Malignant neoplasm of palate                                                            |
| C05.0  | Malignant neoplasm of hard palate                                                       |
| C05.1  | Malignant neoplasm of soft palate                                                       |



|        |                                                                                 |
|--------|---------------------------------------------------------------------------------|
| C05.2  | Malignant neoplasm of uvula                                                     |
| C05.8  | Malignant neoplasm of overlapping sites of palate                               |
| C05.9  | Malignant neoplasm of palate, unspecified                                       |
| C06.   | Malignant neoplasm of other and unspecified parts of mouth                      |
| C06.0  | Malignant neoplasm of cheek mucosa                                              |
| C06.1  | Malignant neoplasm of vestibule of mouth                                        |
| C06.2  | Malignant neoplasm of retromolar area                                           |
| C06.8  | Malignant neoplasm of overlapping sites of other and unspecified parts of mouth |
| C06.80 | Malignant neoplasm of overlapping sites of unspecified parts of mouth           |
| C06.89 | Malignant neoplasm of overlapping sites of other parts of mouth                 |
| C06.9  | Malignant neoplasm of mouth, unspecified                                        |
| C07.   | Malignant neoplasm of parotid gland                                             |
| C08.   | Malignant neoplasm of other and unspecified major salivary glands               |
| C08.0  | Malignant neoplasm of submandibular gland                                       |
| C08.1  | Malignant neoplasm of sublingual gland                                          |
| C08.9  | Malignant neoplasm of major salivary gland, unspecified                         |
| C09.   | Malignant neoplasm of tonsil                                                    |
| C09.0  | Malignant neoplasm of tonsillar fossa                                           |
| C09.1  | Malignant neoplasm of tonsillar pillar (anterior) (posterior)                   |
| C09.8  | Malignant neoplasm of overlapping sites of tonsil                               |
| C09.9  | Malignant neoplasm of tonsil, unspecified                                       |
| C10.   | Malignant neoplasm of oropharynx                                                |
| C10.0  | Malignant neoplasm of vallecula                                                 |
| C10.1  | Malignant neoplasm of anterior surface of epiglottis                            |
| C10.2  | Malignant neoplasm of lateral wall of oropharynx                                |
| C10.3  | Malignant neoplasm of posterior wall of oropharynx                              |
| C10.4  | Malignant neoplasm of branchial cleft                                           |
| C10.8  | Malignant neoplasm of overlapping sites of oropharynx                           |
| C10.9  | Malignant neoplasm of oropharynx, unspecified                                   |
| C11.   | Malignant neoplasm of nasopharynx                                               |
| C11.0  | Malignant neoplasm of superior wall of nasopharynx                              |
| C11.1  | Malignant neoplasm of posterior wall of nasopharynx                             |
| C11.2  | Malignant neoplasm of lateral wall of nasopharynx                               |

|       |                                                                                       |
|-------|---------------------------------------------------------------------------------------|
| C11.3 | Malignant neoplasm of anterior wall of nasopharynx                                    |
| C11.8 | Malignant neoplasm of overlapping sites of nasopharynx                                |
| C11.9 | Malignant neoplasm of nasopharynx, unspecified                                        |
| C12.  | Malignant neoplasm of pyriform sinus                                                  |
| C13.  | Malignant neoplasm of hypopharynx                                                     |
| C13.0 | Malignant neoplasm of postcricoid region                                              |
| C13.1 | Malignant neoplasm of aryepiglottic fold, hypopharyngeal aspect                       |
| C13.2 | Malignant neoplasm of posterior wall of hypopharynx                                   |
| C13.8 | Malignant neoplasm of overlapping sites of hypopharynx                                |
| C13.9 | Malignant neoplasm of hypopharynx, unspecified                                        |
| C14.  | Malignant neoplasm of other and ill-defined sites in the lip, oral cavity and pharynx |
| C14.0 | Malignant neoplasm of pharynx, unspecified                                            |
| C14.2 | Malignant neoplasm of Waldeyer's ring                                                 |
| C14.8 | Malignant neoplasm of overlapping sites of lip, oral cavity and pharynx               |
| C15.  | Malignant neoplasm of esophagus                                                       |
| C15.3 | Malignant neoplasm of upper third of esophagus                                        |
| C15.4 | Malignant neoplasm of middle third of esophagus                                       |
| C15.5 | Malignant neoplasm of lower third of esophagus                                        |
| C15.8 | Malignant neoplasm of overlapping sites of esophagus                                  |
| C15.9 | Malignant neoplasm of esophagus, unspecified                                          |
| C16.  | Malignant neoplasm of stomach                                                         |
| C16.0 | Malignant neoplasm of cardia                                                          |
| C16.1 | Malignant neoplasm of fundus of stomach                                               |
| C16.2 | Malignant neoplasm of body of stomach                                                 |
| C16.3 | Malignant neoplasm of pyloric antrum                                                  |
| C16.4 | Malignant neoplasm of pylorus                                                         |
| C16.5 | Malignant neoplasm of lesser curvature of stomach, unspecified                        |
| C16.6 | Malignant neoplasm of greater curvature of stomach, unspecified                       |
| C16.8 | Malignant neoplasm of overlapping sites of stomach                                    |
| C16.9 | Malignant neoplasm of stomach, unspecified                                            |
| C17.  | Malignant neoplasm of small intestine                                                 |
| C17.0 | Malignant neoplasm of duodenum                                                        |
| C17.1 | Malignant neoplasm of jejunum                                                         |
| C17.2 | Malignant neoplasm of ileum                                                           |

|       |                                                                        |
|-------|------------------------------------------------------------------------|
| C17.3 | Meckel's diverticulum, malignant                                       |
| C17.8 | Malignant neoplasm of overlapping sites of small intestine             |
| C17.9 | Malignant neoplasm of small intestine, unspecified                     |
| C18.  | Malignant neoplasm of colon                                            |
| C18.0 | Malignant neoplasm of cecum                                            |
| C18.1 | Malignant neoplasm of appendix                                         |
| C18.2 | Malignant neoplasm of ascending colon                                  |
| C18.3 | Malignant neoplasm of hepatic flexure                                  |
| C18.4 | Malignant neoplasm of transverse colon                                 |
| C18.5 | Malignant neoplasm of splenic flexure                                  |
| C18.6 | Malignant neoplasm of descending colon                                 |
| C18.7 | Malignant neoplasm of sigmoid colon                                    |
| C18.8 | Malignant neoplasm of overlapping sites of colon                       |
| C18.9 | Malignant neoplasm of colon, unspecified                               |
| C19.  | Malignant neoplasm of rectosigmoid junction                            |
| C20.  | Malignant neoplasm of rectum                                           |
| C21.  | Malignant neoplasm of anus and anal canal                              |
| C21.0 | Malignant neoplasm of anus, unspecified                                |
| C21.1 | Malignant neoplasm of anal canal                                       |
| C21.2 | Malignant neoplasm of cloacogenic zone                                 |
| C21.8 | Malignant neoplasm of overlapping sites of rectum, anus and anal canal |
| C22.  | Malignant neoplasm of liver and intrahepatic bile ducts                |
| C22.0 | Liver cell carcinoma                                                   |
| C22.1 | Intrahepatic bile duct carcinoma                                       |
| C22.2 | Hepatoblastoma                                                         |
| C22.3 | Angiosarcoma of liver                                                  |
| C22.4 | Other sarcomas of liver                                                |
| C22.7 | Other specified carcinomas of liver                                    |
| C22.8 | Malignant neoplasm of liver, primary, unspecified as to type           |
| C22.9 | Malignant neoplasm of liver, not specified as primary or secondary     |
| C23.  | Malignant neoplasm of gallbladder                                      |
| C24.  | Malignant neoplasm of other and unspecified parts of biliary tract     |
| C24.0 | Malignant neoplasm of extrahepatic bile duct                           |
| C24.1 | Malignant neoplasm of ampulla of Vater                                 |

|        |                                                                     |
|--------|---------------------------------------------------------------------|
| C24.8  | Malignant neoplasm of overlapping sites of biliary tract            |
| C24.9  | Malignant neoplasm of biliary tract, unspecified                    |
| C25.   | Malignant neoplasm of pancreas                                      |
| C25.0  | Malignant neoplasm of head of pancreas                              |
| C25.1  | Malignant neoplasm of body of pancreas                              |
| C25.2  | Malignant neoplasm of tail of pancreas                              |
| C25.3  | Malignant neoplasm of pancreatic duct                               |
| C25.4  | Malignant neoplasm of endocrine pancreas                            |
| C25.7  | Malignant neoplasm of other parts of pancreas                       |
| C25.8  | Malignant neoplasm of overlapping sites of pancreas                 |
| C25.9  | Malignant neoplasm of pancreas, unspecified                         |
| C26.   | Malignant neoplasm of other and ill-defined digestive organs        |
| C26.0  | Malignant neoplasm of intestinal tract, part unspecified            |
| C26.1  | Malignant neoplasm of spleen                                        |
| C26.9  | Malignant neoplasm of ill-defined sites within the digestive system |
| C30.   | Malignant neoplasm of nasal cavity and middle ear                   |
| C30.0  | Malignant neoplasm of nasal cavity                                  |
| C30.1  | Malignant neoplasm of middle ear                                    |
| C31.   | Malignant neoplasm of accessory sinuses                             |
| C31.0  | Malignant neoplasm of maxillary sinus                               |
| C31.1  | Malignant neoplasm of ethmoidal sinus                               |
| C31.2  | Malignant neoplasm of frontal sinus                                 |
| C31.3  | Malignant neoplasm of sphenoid sinus                                |
| C31.8  | Malignant neoplasm of overlapping sites of accessory sinuses        |
| C31.9  | Malignant neoplasm of accessory sinus, unspecified                  |
| C32.   | Malignant neoplasm of larynx                                        |
| C32.0  | Malignant neoplasm of glottis                                       |
| C32.1  | Malignant neoplasm of supraglottis                                  |
| C32.2  | Malignant neoplasm of subglottis                                    |
| C32.3  | Malignant neoplasm of laryngeal cartilage                           |
| C32.8  | Malignant neoplasm of overlapping sites of larynx                   |
| C32.9  | Malignant neoplasm of larynx, unspecified                           |
| C33.   | Malignant neoplasm of trachea                                       |
| C34.   | Malignant neoplasm of bronchus and lung                             |
| C34.0  | Malignant neoplasm of main bronchus                                 |
| C34.00 | Malignant neoplasm of unspecified main bronchus                     |

|        |                                                                          |
|--------|--------------------------------------------------------------------------|
| C34.01 | Malignant neoplasm of right main bronchus                                |
| C34.02 | Malignant neoplasm of left main bronchus                                 |
| C34.1  | Malignant neoplasm of upper lobe, bronchus or lung                       |
| C34.10 | Malignant neoplasm of upper lobe, unspecified bronchus or lung           |
| C34.11 | Malignant neoplasm of upper lobe, right bronchus or lung                 |
| C34.12 | Malignant neoplasm of upper lobe, left bronchus or lung                  |
| C34.2  | Malignant neoplasm of middle lobe, bronchus or lung                      |
| C34.3  | Malignant neoplasm of lower lobe, bronchus or lung                       |
| C34.30 | Malignant neoplasm of lower lobe, unspecified bronchus or lung           |
| C34.31 | Malignant neoplasm of lower lobe, right bronchus or lung                 |
| C34.32 | Malignant neoplasm of lower lobe, left bronchus or lung                  |
| C34.8  | Malignant neoplasm of overlapping sites of bronchus and lung             |
| C34.80 | Malignant neoplasm of overlapping sites of unspecified bronchus and lung |
| C34.81 | Malignant neoplasm of overlapping sites of right bronchus and lung       |
| C34.82 | Malignant neoplasm of overlapping sites of left bronchus and lung        |
| C34.9  | Malignant neoplasm of unspecified part of bronchus or lung               |
| C34.90 | Malignant neoplasm of unspecified part of unspecified bronchus or lung   |
| C34.91 | Malignant neoplasm of unspecified part of right bronchus or lung         |
| C34.92 | Malignant neoplasm of unspecified part of left bronchus or lung          |
| C37.   | Malignant neoplasm of thymus                                             |
| C38.   | Malignant neoplasm of heart, mediastinum and pleura                      |
| C38.0  | Malignant neoplasm of heart                                              |
| C38.1  | Malignant neoplasm of anterior mediastinum                               |
| C38.2  | Malignant neoplasm of posterior mediastinum                              |
| C38.3  | Malignant neoplasm of mediastinum, part unspecified                      |
| C38.4  | Malignant neoplasm of pleura                                             |

|        |                                                                                                      |
|--------|------------------------------------------------------------------------------------------------------|
| C38.8  | Malignant neoplasm of overlapping sites of heart, mediastinum and pleura                             |
| C39.   | Malignant neoplasm of other and ill-defined sites in the respiratory system and intrathoracic organs |
| C39.0  | Malignant neoplasm of upper respiratory tract, part unspecified                                      |
| C39.9  | Malignant neoplasm of lower respiratory tract, part unspecified                                      |
| C40.   | Malignant neoplasm of bone and articular cartilage of limbs                                          |
| C40.0  | Malignant neoplasm of scapula and long bones of upper limb                                           |
| C40.00 | Malignant neoplasm of scapula and long bones of unspecified upper limb                               |
| C40.01 | Malignant neoplasm of scapula and long bones of right upper limb                                     |
| C40.02 | Malignant neoplasm of scapula and long bones of left upper limb                                      |
| C40.1  | Malignant neoplasm of short bones of upper limb                                                      |
| C40.10 | Malignant neoplasm of short bones of unspecified upper limb                                          |
| C40.11 | Malignant neoplasm of short bones of right upper limb                                                |
| C40.12 | Malignant neoplasm of short bones of left upper limb                                                 |
| C40.2  | Malignant neoplasm of long bones of lower limb                                                       |
| C40.20 | Malignant neoplasm of long bones of unspecified lower limb                                           |
| C40.21 | Malignant neoplasm of long bones of right lower limb                                                 |
| C40.22 | Malignant neoplasm of long bones of left lower limb                                                  |
| C40.3  | Malignant neoplasm of short bones of lower limb                                                      |
| C40.30 | Malignant neoplasm of short bones of unspecified lower limb                                          |
| C40.31 | Malignant neoplasm of short bones of right lower limb                                                |
| C40.32 | Malignant neoplasm of short bones of left lower limb                                                 |
| C40.8  | Malignant neoplasm of overlapping sites of bone and articular cartilage of limb                      |
| C40.80 | Malignant neoplasm of overlapping sites of bone and articular cartilage of unspecified limb          |
| C40.81 | Malignant neoplasm of overlapping sites of bone and articular cartilage of right limb                |

|        |                                                                                      |
|--------|--------------------------------------------------------------------------------------|
| C40.82 | Malignant neoplasm of overlapping sites of bone and articular cartilage of left limb |
| C40.9  | Malignant neoplasm of unspecified bones and articular cartilage of limb              |
| C40.90 | Malignant neoplasm of unspecified bones and articular cartilage of unspecified limb  |
| C40.91 | Malignant neoplasm of unspecified bones and articular cartilage of right limb        |
| C40.92 | Malignant neoplasm of unspecified bones and articular cartilage of left limb         |
| C41.   | Malignant neoplasm of bone and articular cartilage of other and unspecified sites    |
| C41.0  | Malignant neoplasm of bones of skull and face                                        |
| C41.1  | Malignant neoplasm of mandible                                                       |
| C41.2  | Malignant neoplasm of vertebral column                                               |
| C41.3  | Malignant neoplasm of ribs, sternum and clavicle                                     |
| C41.4  | Malignant neoplasm of pelvic bones, sacrum and coccyx                                |
| C41.9  | Malignant neoplasm of bone and articular cartilage, unspecified                      |
| C43.   | Malignant melanoma of skin                                                           |
| C43.0  | Malignant melanoma of lip                                                            |
| C43.1  | Malignant melanoma of eyelid, including canthus                                      |
| C43.10 | Malignant melanoma of unspecified eyelid, including canthus                          |
| C43.11 | Malignant melanoma of right eyelid, including canthus                                |
| C43.12 | Malignant melanoma of left eyelid, including canthus                                 |
| C43.2  | Malignant melanoma of ear and external auricular canal                               |
| C43.20 | Malignant melanoma of unspecified ear and external auricular canal                   |
| C43.21 | Malignant melanoma of right ear and external auricular canal                         |
| C43.22 | Malignant melanoma of left ear and external auricular canal                          |
| C43.3  | Malignant melanoma of other and unspecified parts of face                            |
| C43.30 | Malignant melanoma of unspecified part of face                                       |
| C43.31 | Malignant melanoma of nose                                                           |
| C43.39 | Malignant melanoma of other parts of face                                            |
| C43.4  | Malignant melanoma of scalp and neck                                                 |

|         |                                                                                 |
|---------|---------------------------------------------------------------------------------|
| C43.5   | Malignant melanoma of trunk                                                     |
| C43.51  | Malignant melanoma of anal skin                                                 |
| C43.52  | Malignant melanoma of skin of breast                                            |
| C43.59  | Malignant melanoma of other part of trunk                                       |
| C43.6   | Malignant melanoma of upper limb, including shoulder                            |
| C43.60  | Malignant melanoma of unspecified upper limb, including shoulder                |
| C43.61  | Malignant melanoma of right upper limb, including shoulder                      |
| C43.62  | Malignant melanoma of left upper limb, including shoulder                       |
| C43.7   | Malignant melanoma of lower limb, including hip                                 |
| C43.70  | Malignant melanoma of unspecified lower limb, including hip                     |
| C43.71  | Malignant melanoma of right lower limb, including hip                           |
| C43.72  | Malignant melanoma of left lower limb, including hip                            |
| C43.8   | Malignant melanoma of overlapping sites of skin                                 |
| C43.9   | Malignant melanoma of skin, unspecified                                         |
| C44.    | Other and unspecified malignant neoplasm of skin                                |
| C44.0   | Other and unspecified malignant neoplasm of skin of lip                         |
| C44.00  | Unspecified malignant neoplasm of skin of lip                                   |
| C44.01  | Basal cell carcinoma of skin of lip                                             |
| C44.02  | Squamous cell carcinoma of skin of lip                                          |
| C44.09  | Other specified malignant neoplasm of skin of lip                               |
| C44.1   | Other and unspecified malignant neoplasm of skin of eyelid, including canthus   |
| C44.10  | Unspecified malignant neoplasm of skin of eyelid, including canthus             |
| C44.101 | Unspecified malignant neoplasm of skin of unspecified eyelid, including canthus |
| C44.102 | Unspecified malignant neoplasm of skin of right eyelid, including canthus       |
| C44.109 | Unspecified malignant neoplasm of skin of left eyelid, including canthus        |
| C44.11  | Basal cell carcinoma of skin of eyelid, including canthus                       |
| C44.111 | Basal cell carcinoma of skin of unspecified eyelid, including canthus           |
| C44.112 | Basal cell carcinoma of skin of right eyelid, including canthus                 |



|         |                                                                                        |
|---------|----------------------------------------------------------------------------------------|
| C44.119 | Basal cell carcinoma of skin of left eyelid, including canthus                         |
| C44.12  | Squamous cell carcinoma of skin of eyelid, including canthus                           |
| C44.121 | Squamous cell carcinoma of skin of unspecified eyelid, including canthus               |
| C44.122 | Squamous cell carcinoma of skin of right eyelid, including canthus                     |
| C44.129 | Squamous cell carcinoma of skin of left eyelid, including canthus                      |
| C44.19  | Other specified malignant neoplasm of skin of eyelid, including canthus                |
| C44.191 | Other specified malignant neoplasm of skin of unspecified eyelid, including canthus    |
| C44.192 | Other specified malignant neoplasm of skin of right eyelid, including canthus          |
| C44.199 | Other specified malignant neoplasm of skin of left eyelid, including canthus           |
| C44.2   | Other and unspecified malignant neoplasm of skin of ear and external auricular canal   |
| C44.20  | Unspecified malignant neoplasm of skin of ear and external auricular canal             |
| C44.201 | Unspecified malignant neoplasm of skin of unspecified ear and external auricular canal |
| C44.202 | Unspecified malignant neoplasm of skin of right ear and external auricular canal       |
| C44.209 | Unspecified malignant neoplasm of skin of left ear and external auricular canal        |
| C44.21  | Basal cell carcinoma of skin of ear and external auricular canal                       |
| C44.211 | Basal cell carcinoma of skin of unspecified ear and external auricular canal           |
| C44.212 | Basal cell carcinoma of skin of right ear and external auricular canal                 |
| C44.219 | Basal cell carcinoma of skin of left ear and external auricular canal                  |
| C44.22  | Squamous cell carcinoma of skin of ear and external auricular canal                    |

|         |                                                                                            |
|---------|--------------------------------------------------------------------------------------------|
| C44.221 | Squamous cell carcinoma of skin of unspecified ear and external auricular canal            |
| C44.222 | Squamous cell carcinoma of skin of right ear and external auricular canal                  |
| C44.229 | Squamous cell carcinoma of skin of left ear and external auricular canal                   |
| C44.29  | Other specified malignant neoplasm of skin of ear and external auricular canal             |
| C44.291 | Other specified malignant neoplasm of skin of unspecified ear and external auricular canal |
| C44.292 | Other specified malignant neoplasm of skin of right ear and external auricular canal       |
| C44.299 | Other specified malignant neoplasm of skin of left ear and external auricular canal        |
| C44.3   | Other and unspecified malignant neoplasm of skin of other and unspecified parts of face    |
| C44.30  | Unspecified malignant neoplasm of skin of other and unspecified parts of face              |
| C44.300 | Unspecified malignant neoplasm of skin of unspecified part of face                         |
| C44.301 | Unspecified malignant neoplasm of skin of nose                                             |
| C44.309 | Unspecified malignant neoplasm of skin of other parts of face                              |
| C44.31  | Basal cell carcinoma of skin of other and unspecified parts of face                        |
| C44.310 | Basal cell carcinoma of skin of unspecified parts of face                                  |
| C44.311 | Basal cell carcinoma of skin of nose                                                       |
| C44.319 | Basal cell carcinoma of skin of other parts of face                                        |
| C44.32  | Squamous cell carcinoma of skin of other and unspecified parts of face                     |
| C44.320 | Squamous cell carcinoma of skin of unspecified parts of face                               |
| C44.321 | Squamous cell carcinoma of skin of nose                                                    |
| C44.329 | Squamous cell carcinoma of skin of other parts of face                                     |
| C44.39  | Other specified malignant neoplasm of skin of other and unspecified parts of face          |
| C44.390 | Other specified malignant neoplasm of skin of unspecified parts of face                    |
| C44.391 | Other specified malignant neoplasm of skin of nose                                         |

|         |                                                                                      |
|---------|--------------------------------------------------------------------------------------|
| C44.399 | Other specified malignant neoplasm of skin of other parts of face                    |
| C44.4   | Other and unspecified malignant neoplasm of skin of scalp and neck                   |
| C44.40  | Unspecified malignant neoplasm of skin of scalp and neck                             |
| C44.41  | Basal cell carcinoma of skin of scalp and neck                                       |
| C44.42  | Squamous cell carcinoma of skin of scalp and neck                                    |
| C44.49  | Other specified malignant neoplasm of skin of scalp and neck                         |
| C44.5   | Other and unspecified malignant neoplasm of skin of trunk                            |
| C44.50  | Unspecified malignant neoplasm of skin of trunk                                      |
| C44.500 | Unspecified malignant neoplasm of anal skin                                          |
| C44.501 | Unspecified malignant neoplasm of skin of breast                                     |
| C44.509 | Unspecified malignant neoplasm of skin of other part of trunk                        |
| C44.51  | Basal cell carcinoma of skin of trunk                                                |
| C44.510 | Basal cell carcinoma of anal skin                                                    |
| C44.511 | Basal cell carcinoma of skin of breast                                               |
| C44.519 | Basal cell carcinoma of skin of other part of trunk                                  |
| C44.52  | Squamous cell carcinoma of skin of trunk                                             |
| C44.520 | Squamous cell carcinoma of anal skin                                                 |
| C44.521 | Squamous cell carcinoma of skin of breast                                            |
| C44.529 | Squamous cell carcinoma of skin of other part of trunk                               |
| C44.59  | Other specified malignant neoplasm of skin of trunk                                  |
| C44.590 | Other specified malignant neoplasm of anal skin                                      |
| C44.591 | Other specified malignant neoplasm of skin of breast                                 |
| C44.599 | Other specified malignant neoplasm of skin of other part of trunk                    |
| C44.6   | Other and unspecified malignant neoplasm of skin of upper limb, including shoulder   |
| C44.60  | Unspecified malignant neoplasm of skin of upper limb, including shoulder             |
| C44.601 | Unspecified malignant neoplasm of skin of unspecified upper limb, including shoulder |
| C44.602 | Unspecified malignant neoplasm of skin of right upper limb, including shoulder       |
| C44.609 | Unspecified malignant neoplasm of skin of left upper limb, including shoulder        |

|         |                                                                                          |
|---------|------------------------------------------------------------------------------------------|
| C44.61  | Basal cell carcinoma of skin of upper limb, including shoulder                           |
| C44.611 | Basal cell carcinoma of skin of unspecified upper limb, including shoulder               |
| C44.612 | Basal cell carcinoma of skin of right upper limb, including shoulder                     |
| C44.619 | Basal cell carcinoma of skin of left upper limb, including shoulder                      |
| C44.62  | Squamous cell carcinoma of skin of upper limb, including shoulder                        |
| C44.621 | Squamous cell carcinoma of skin of unspecified upper limb, including shoulder            |
| C44.622 | Squamous cell carcinoma of skin of right upper limb, including shoulder                  |
| C44.629 | Squamous cell carcinoma of skin of left upper limb, including shoulder                   |
| C44.69  | Other specified malignant neoplasm of skin of upper limb, including shoulder             |
| C44.691 | Other specified malignant neoplasm of skin of unspecified upper limb, including shoulder |
| C44.692 | Other specified malignant neoplasm of skin of right upper limb, including shoulder       |
| C44.699 | Other specified malignant neoplasm of skin of left upper limb, including shoulder        |
| C44.7   | Other and unspecified malignant neoplasm of skin of lower limb, including hip            |
| C44.70  | Unspecified malignant neoplasm of skin of lower limb, including hip                      |
| C44.701 | Unspecified malignant neoplasm of skin of unspecified lower limb, including hip          |
| C44.702 | Unspecified malignant neoplasm of skin of right lower limb, including hip                |
| C44.709 | Unspecified malignant neoplasm of skin of left lower limb, including hip                 |
| C44.71  | Basal cell carcinoma of skin of lower limb, including hip                                |
| C44.711 | Basal cell carcinoma of skin of unspecified lower limb, including hip                    |
| C44.712 | Basal cell carcinoma of skin of right lower limb, including hip                          |

|         |                                                                                     |
|---------|-------------------------------------------------------------------------------------|
| C44.719 | Basal cell carcinoma of skin of left lower limb, including hip                      |
| C44.72  | Squamous cell carcinoma of skin of lower limb, including hip                        |
| C44.721 | Squamous cell carcinoma of skin of unspecified lower limb, including hip            |
| C44.722 | Squamous cell carcinoma of skin of right lower limb, including hip                  |
| C44.729 | Squamous cell carcinoma of skin of left lower limb, including hip                   |
| C44.79  | Other specified malignant neoplasm of skin of lower limb, including hip             |
| C44.791 | Other specified malignant neoplasm of skin of unspecified lower limb, including hip |
| C44.792 | Other specified malignant neoplasm of skin of right lower limb, including hip       |
| C44.799 | Other specified malignant neoplasm of skin of left lower limb, including hip        |
| C44.8   | Other and unspecified malignant neoplasm of overlapping sites of skin               |
| C44.80  | Unspecified malignant neoplasm of overlapping sites of skin                         |
| C44.81  | Basal cell carcinoma of overlapping sites of skin                                   |
| C44.82  | Squamous cell carcinoma of overlapping sites of skin                                |
| C44.89  | Other specified malignant neoplasm of overlapping sites of skin                     |
| C44.9   | Other and unspecified malignant neoplasm of skin, unspecified                       |
| C44.90  | Unspecified malignant neoplasm of skin, unspecified                                 |
| C44.91  | Basal cell carcinoma of skin, unspecified                                           |
| C44.92  | Squamous cell carcinoma of skin, unspecified                                        |
| C44.99  | Other specified malignant neoplasm of skin, unspecified                             |
| C45.    | Mesothelioma                                                                        |
| C45.0   | Mesothelioma of pleura                                                              |
| C45.1   | Mesothelioma of peritoneum                                                          |
| C45.2   | Mesothelioma of pericardium                                                         |
| C45.7   | Mesothelioma of other sites                                                         |
| C45.9   | Mesothelioma, unspecified                                                           |
| C46.    | Kaposi's sarcoma                                                                    |

|        |                                                                                           |
|--------|-------------------------------------------------------------------------------------------|
| C46.0  | Kaposi's sarcoma of skin                                                                  |
| C46.1  | Kaposi's sarcoma of soft tissue                                                           |
| C46.2  | Kaposi's sarcoma of palate                                                                |
| C46.3  | Kaposi's sarcoma of lymph nodes                                                           |
| C46.4  | Kaposi's sarcoma of gastrointestinal sites                                                |
| C46.5  | Kaposi's sarcoma of lung                                                                  |
| C46.50 | Kaposi's sarcoma of unspecified lung                                                      |
| C46.51 | Kaposi's sarcoma of right lung                                                            |
| C46.52 | Kaposi's sarcoma of left lung                                                             |
| C46.7  | Kaposi's sarcoma of other sites                                                           |
| C46.9  | Kaposi's sarcoma, unspecified                                                             |
| C47.   | Malignant neoplasm of peripheral nerves and autonomic nervous system                      |
| C47.0  | Malignant neoplasm of peripheral nerves of head, face and neck                            |
| C47.1  | Malignant neoplasm of peripheral nerves of upper limb, including shoulder                 |
| C47.10 | Malignant neoplasm of peripheral nerves of unspecified upper limb, including shoulder     |
| C47.11 | Malignant neoplasm of peripheral nerves of right upper limb, including shoulder           |
| C47.12 | Malignant neoplasm of peripheral nerves of left upper limb, including shoulder            |
| C47.2  | Malignant neoplasm of peripheral nerves of lower limb, including hip                      |
| C47.20 | Malignant neoplasm of peripheral nerves of unspecified lower limb, including hip          |
| C47.21 | Malignant neoplasm of peripheral nerves of right lower limb, including hip                |
| C47.22 | Malignant neoplasm of peripheral nerves of left lower limb, including hip                 |
| C47.3  | Malignant neoplasm of peripheral nerves of thorax                                         |
| C47.4  | Malignant neoplasm of peripheral nerves of abdomen                                        |
| C47.5  | Malignant neoplasm of peripheral nerves of pelvis                                         |
| C47.6  | Malignant neoplasm of peripheral nerves of trunk, unspecified                             |
| C47.8  | Malignant neoplasm of overlapping sites of peripheral nerves and autonomic nervous system |

|        |                                                                                                |
|--------|------------------------------------------------------------------------------------------------|
| C47.9  | Malignant neoplasm of peripheral nerves and autonomic nervous system, unspecified              |
| C48.   | Malignant neoplasm of retroperitoneum and peritoneum                                           |
| C48.0  | Malignant neoplasm of retroperitoneum                                                          |
| C48.1  | Malignant neoplasm of specified parts of peritoneum                                            |
| C48.2  | Malignant neoplasm of peritoneum, unspecified                                                  |
| C48.8  | Malignant neoplasm of overlapping sites of retroperitoneum and peritoneum                      |
| C49.   | Malignant neoplasm of other connective and soft tissue                                         |
| C49.0  | Malignant neoplasm of connective and soft tissue of head, face and neck                        |
| C49.1  | Malignant neoplasm of connective and soft tissue of upper limb, including shoulder             |
| C49.10 | Malignant neoplasm of connective and soft tissue of unspecified upper limb, including shoulder |
| C49.11 | Malignant neoplasm of connective and soft tissue of right upper limb, including shoulder       |
| C49.12 | Malignant neoplasm of connective and soft tissue of left upper limb, including shoulder        |
| C49.2  | Malignant neoplasm of connective and soft tissue of lower limb, including hip                  |
| C49.20 | Malignant neoplasm of connective and soft tissue of unspecified lower limb, including hip      |
| C49.21 | Malignant neoplasm of connective and soft tissue of right lower limb, including hip            |
| C49.22 | Malignant neoplasm of connective and soft tissue of left lower limb, including hip             |
| C49.3  | Malignant neoplasm of connective and soft tissue of thorax                                     |
| C49.4  | Malignant neoplasm of connective and soft tissue of abdomen                                    |
| C49.5  | Malignant neoplasm of connective and soft tissue of pelvis                                     |
| C49.6  | Malignant neoplasm of connective and soft tissue of trunk, unspecified                         |
| C49.8  | Malignant neoplasm of overlapping sites of connective and soft tissue                          |
| C49.9  | Malignant neoplasm of connective and soft tissue, unspecified                                  |

|         |                                                                    |
|---------|--------------------------------------------------------------------|
| C49.A   | Gastrointestinal stromal tumor                                     |
| C49.A0  | Gastrointestinal stromal tumor, unspecified site                   |
| C49.A1  | Gastrointestinal stromal tumor of esophagus                        |
| C49.A2  | Gastrointestinal stromal tumor of stomach                          |
| C49.A3  | Gastrointestinal stromal tumor of small intestine                  |
| C49.A4  | Gastrointestinal stromal tumor of large intestine                  |
| C49.A5  | Gastrointestinal stromal tumor of rectum                           |
| C49.A9  | Gastrointestinal stromal tumor of other sites                      |
| C50.    | Malignant neoplasm of breast                                       |
| C50.0   | Malignant neoplasm of nipple and areola                            |
| C50.01  | Malignant neoplasm of nipple and areola, female                    |
| C50.011 | Malignant neoplasm of nipple and areola, right female breast       |
| C50.012 | Malignant neoplasm of nipple and areola, left female breast        |
| C50.019 | Malignant neoplasm of nipple and areola, unspecified female breast |
| C50.02  | Malignant neoplasm of nipple and areola, male                      |
| C50.021 | Malignant neoplasm of nipple and areola, right male breast         |
| C50.022 | Malignant neoplasm of nipple and areola, left male breast          |
| C50.029 | Malignant neoplasm of nipple and areola, unspecified male breast   |
| C50.1   | Malignant neoplasm of central portion of breast                    |
| C50.11  | Malignant neoplasm of central portion of breast, female            |
| C50.111 | Malignant neoplasm of central portion of right female breast       |
| C50.112 | Malignant neoplasm of central portion of left female breast        |
| C50.119 | Malignant neoplasm of central portion of unspecified female breast |
| C50.12  | Malignant neoplasm of central portion of breast, male              |
| C50.121 | Malignant neoplasm of central portion of right male breast         |
| C50.122 | Malignant neoplasm of central portion of left male breast          |
| C50.129 | Malignant neoplasm of central portion of unspecified male breast   |
| C50.2   | Malignant neoplasm of upper-inner quadrant of breast               |



|         |                                                                         |
|---------|-------------------------------------------------------------------------|
| C50.21  | Malignant neoplasm of upper-inner quadrant of breast, female            |
| C50.211 | Malignant neoplasm of upper-inner quadrant of right female breast       |
| C50.212 | Malignant neoplasm of upper-inner quadrant of left female breast        |
| C50.219 | Malignant neoplasm of upper-inner quadrant of unspecified female breast |
| C50.22  | Malignant neoplasm of upper-inner quadrant of breast, male              |
| C50.221 | Malignant neoplasm of upper-inner quadrant of right male breast         |
| C50.222 | Malignant neoplasm of upper-inner quadrant of left male breast          |
| C50.229 | Malignant neoplasm of upper-inner quadrant of unspecified male breast   |
| C50.3   | Malignant neoplasm of lower-inner quadrant of breast                    |
| C50.31  | Malignant neoplasm of lower-inner quadrant of breast, female            |
| C50.311 | Malignant neoplasm of lower-inner quadrant of right female breast       |
| C50.312 | Malignant neoplasm of lower-inner quadrant of left female breast        |
| C50.319 | Malignant neoplasm of lower-inner quadrant of unspecified female breast |
| C50.32  | Malignant neoplasm of lower-inner quadrant of breast, male              |
| C50.321 | Malignant neoplasm of lower-inner quadrant of right male breast         |
| C50.322 | Malignant neoplasm of lower-inner quadrant of left male breast          |
| C50.329 | Malignant neoplasm of lower-inner quadrant of unspecified male breast   |
| C50.4   | Malignant neoplasm of upper-outer quadrant of breast                    |
| C50.41  | Malignant neoplasm of upper-outer quadrant of breast, female            |
| C50.411 | Malignant neoplasm of upper-outer quadrant of right female breast       |

|         |                                                                         |
|---------|-------------------------------------------------------------------------|
| C50.412 | Malignant neoplasm of upper-outer quadrant of left female breast        |
| C50.419 | Malignant neoplasm of upper-outer quadrant of unspecified female breast |
| C50.42  | Malignant neoplasm of upper-outer quadrant of breast, male              |
| C50.421 | Malignant neoplasm of upper-outer quadrant of right male breast         |
| C50.422 | Malignant neoplasm of upper-outer quadrant of left male breast          |
| C50.429 | Malignant neoplasm of upper-outer quadrant of unspecified male breast   |
| C50.5   | Malignant neoplasm of lower-outer quadrant of breast                    |
| C50.51  | Malignant neoplasm of lower-outer quadrant of breast, female            |
| C50.511 | Malignant neoplasm of lower-outer quadrant of right female breast       |
| C50.512 | Malignant neoplasm of lower-outer quadrant of left female breast        |
| C50.519 | Malignant neoplasm of lower-outer quadrant of unspecified female breast |
| C50.52  | Malignant neoplasm of lower-outer quadrant of breast, male              |
| C50.521 | Malignant neoplasm of lower-outer quadrant of right male breast         |
| C50.522 | Malignant neoplasm of lower-outer quadrant of left male breast          |
| C50.529 | Malignant neoplasm of lower-outer quadrant of unspecified male breast   |
| C50.6   | Malignant neoplasm of axillary tail of breast                           |
| C50.61  | Malignant neoplasm of axillary tail of breast, female                   |
| C50.611 | Malignant neoplasm of axillary tail of right female breast              |
| C50.612 | Malignant neoplasm of axillary tail of left female breast               |
| C50.619 | Malignant neoplasm of axillary tail of unspecified female breast        |
| C50.62  | Malignant neoplasm of axillary tail of breast, male                     |
| C50.621 | Malignant neoplasm of axillary tail of right male breast                |
| C50.622 | Malignant neoplasm of axillary tail of left male breast                 |

|         |                                                                      |
|---------|----------------------------------------------------------------------|
| C50.629 | Malignant neoplasm of axillary tail of unspecified male breast       |
| C50.8   | Malignant neoplasm of overlapping sites of breast                    |
| C50.81  | Malignant neoplasm of overlapping sites of breast, female            |
| C50.811 | Malignant neoplasm of overlapping sites of right female breast       |
| C50.812 | Malignant neoplasm of overlapping sites of left female breast        |
| C50.819 | Malignant neoplasm of overlapping sites of unspecified female breast |
| C50.82  | Malignant neoplasm of overlapping sites of breast, male              |
| C50.821 | Malignant neoplasm of overlapping sites of right male breast         |
| C50.822 | Malignant neoplasm of overlapping sites of left male breast          |
| C50.829 | Malignant neoplasm of overlapping sites of unspecified male breast   |
| C50.9   | Malignant neoplasm of breast of unspecified site                     |
| C50.91  | Malignant neoplasm of breast of unspecified site, female             |
| C50.911 | Malignant neoplasm of unspecified site of right female breast        |
| C50.912 | Malignant neoplasm of unspecified site of left female breast         |
| C50.919 | Malignant neoplasm of unspecified site of unspecified female breast  |
| C50.92  | Malignant neoplasm of breast of unspecified site, male               |
| C50.921 | Malignant neoplasm of unspecified site of right male breast          |
| C50.922 | Malignant neoplasm of unspecified site of left male breast           |
| C50.929 | Malignant neoplasm of unspecified site of unspecified male breast    |
| C51.    | Malignant neoplasm of vulva                                          |
| C51.0   | Malignant neoplasm of labium majus                                   |
| C51.1   | Malignant neoplasm of labium minus                                   |
| C51.2   | Malignant neoplasm of clitoris                                       |
| C51.8   | Malignant neoplasm of overlapping sites of vulva                     |
| C51.9   | Malignant neoplasm of vulva, unspecified                             |
| C52.    | Malignant neoplasm of vagina                                         |
| C53.    | Malignant neoplasm of cervix uteri                                   |

|        |                                                                   |
|--------|-------------------------------------------------------------------|
| C53.0  | Malignant neoplasm of endocervix                                  |
| C53.1  | Malignant neoplasm of exocervix                                   |
| C53.8  | Malignant neoplasm of overlapping sites of cervix uteri           |
| C53.9  | Malignant neoplasm of cervix uteri, unspecified                   |
| C54.   | Malignant neoplasm of corpus uteri                                |
| C54.0  | Malignant neoplasm of isthmus uteri                               |
| C54.1  | Malignant neoplasm of endometrium                                 |
| C54.2  | Malignant neoplasm of myometrium                                  |
| C54.3  | Malignant neoplasm of fundus uteri                                |
| C54.8  | Malignant neoplasm of overlapping sites of corpus uteri           |
| C54.9  | Malignant neoplasm of corpus uteri, unspecified                   |
| C55.   | Malignant neoplasm of uterus, part unspecified                    |
| C56.   | Malignant neoplasm of ovary                                       |
| C56.1  | Malignant neoplasm of right ovary                                 |
| C56.2  | Malignant neoplasm of left ovary                                  |
| C56.9  | Malignant neoplasm of unspecified ovary                           |
| C57.   | Malignant neoplasm of other and unspecified female genital organs |
| C57.0  | Malignant neoplasm of fallopian tube                              |
| C57.00 | Malignant neoplasm of unspecified fallopian tube                  |
| C57.01 | Malignant neoplasm of right fallopian tube                        |
| C57.02 | Malignant neoplasm of left fallopian tube                         |
| C57.1  | Malignant neoplasm of broad ligament                              |
| C57.10 | Malignant neoplasm of unspecified broad ligament                  |
| C57.11 | Malignant neoplasm of right broad ligament                        |
| C57.12 | Malignant neoplasm of left broad ligament                         |
| C57.2  | Malignant neoplasm of round ligament                              |
| C57.20 | Malignant neoplasm of unspecified round ligament                  |
| C57.21 | Malignant neoplasm of right round ligament                        |
| C57.22 | Malignant neoplasm of left round ligament                         |
| C57.3  | Malignant neoplasm of parametrium                                 |
| C57.4  | Malignant neoplasm of uterine adnexa, unspecified                 |
| C57.7  | Malignant neoplasm of other specified female genital organs       |
| C57.8  | Malignant neoplasm of overlapping sites of female genital organs  |
| C57.9  | Malignant neoplasm of female genital organ, unspecified           |
| C58.   | Malignant neoplasm of placenta                                    |
| C60.   | Malignant neoplasm of penis                                       |

|        |                                                                                        |
|--------|----------------------------------------------------------------------------------------|
| C60.0  | Malignant neoplasm of prepuce                                                          |
| C60.1  | Malignant neoplasm of glans penis                                                      |
| C60.2  | Malignant neoplasm of body of penis                                                    |
| C60.8  | Malignant neoplasm of overlapping sites of penis                                       |
| C60.9  | Malignant neoplasm of penis, unspecified                                               |
| C61.   | Malignant neoplasm of prostate                                                         |
| C62.   | Malignant neoplasm of testis                                                           |
| C62.0  | Malignant neoplasm of undescended testis                                               |
| C62.00 | Malignant neoplasm of unspecified undescended testis                                   |
| C62.01 | Malignant neoplasm of undescended right testis                                         |
| C62.02 | Malignant neoplasm of undescended left testis                                          |
| C62.1  | Malignant neoplasm of descended testis                                                 |
| C62.10 | Malignant neoplasm of unspecified descended testis                                     |
| C62.11 | Malignant neoplasm of descended right testis                                           |
| C62.12 | Malignant neoplasm of descended left testis                                            |
| C62.9  | Malignant neoplasm of testis, unspecified whether descended or undescended             |
| C62.90 | Malignant neoplasm of unspecified testis, unspecified whether descended or undescended |
| C62.91 | Malignant neoplasm of right testis, unspecified whether descended or undescended       |
| C62.92 | Malignant neoplasm of left testis, unspecified whether descended or undescended        |
| C63.   | Malignant neoplasm of other and unspecified male genital organs                        |
| C63.0  | Malignant neoplasm of epididymis                                                       |
| C63.00 | Malignant neoplasm of unspecified epididymis                                           |
| C63.01 | Malignant neoplasm of right epididymis                                                 |
| C63.02 | Malignant neoplasm of left epididymis                                                  |
| C63.1  | Malignant neoplasm of spermatic cord                                                   |
| C63.10 | Malignant neoplasm of unspecified spermatic cord                                       |
| C63.11 | Malignant neoplasm of right spermatic cord                                             |
| C63.12 | Malignant neoplasm of left spermatic cord                                              |
| C63.2  | Malignant neoplasm of scrotum                                                          |
| C63.7  | Malignant neoplasm of other specified male genital organs                              |
| C63.8  | Malignant neoplasm of overlapping sites of male genital organs                         |
| C63.9  | Malignant neoplasm of male genital organ, unspecified                                  |

|        |                                                               |
|--------|---------------------------------------------------------------|
| C64.   | Malignant neoplasm of kidney, except renal pelvis             |
| C64.1  | Malignant neoplasm of right kidney, except renal pelvis       |
| C64.2  | Malignant neoplasm of left kidney, except renal pelvis        |
| C64.9  | Malignant neoplasm of unspecified kidney, except renal pelvis |
| C65.   | Malignant neoplasm of renal pelvis                            |
| C65.1  | Malignant neoplasm of right renal pelvis                      |
| C65.2  | Malignant neoplasm of left renal pelvis                       |
| C65.9  | Malignant neoplasm of unspecified renal pelvis                |
| C66.   | Malignant neoplasm of ureter                                  |
| C66.1  | Malignant neoplasm of right ureter                            |
| C66.2  | Malignant neoplasm of left ureter                             |
| C66.9  | Malignant neoplasm of unspecified ureter                      |
| C67.   | Malignant neoplasm of bladder                                 |
| C67.0  | Malignant neoplasm of trigone of bladder                      |
| C67.1  | Malignant neoplasm of dome of bladder                         |
| C67.2  | Malignant neoplasm of lateral wall of bladder                 |
| C67.3  | Malignant neoplasm of anterior wall of bladder                |
| C67.4  | Malignant neoplasm of posterior wall of bladder               |
| C67.5  | Malignant neoplasm of bladder neck                            |
| C67.6  | Malignant neoplasm of ureteric orifice                        |
| C67.7  | Malignant neoplasm of urachus                                 |
| C67.8  | Malignant neoplasm of overlapping sites of bladder            |
| C67.9  | Malignant neoplasm of bladder, unspecified                    |
| C68.   | Malignant neoplasm of other and unspecified urinary organs    |
| C68.0  | Malignant neoplasm of urethra                                 |
| C68.1  | Malignant neoplasm of paraurethral glands                     |
| C68.8  | Malignant neoplasm of overlapping sites of urinary organs     |
| C68.9  | Malignant neoplasm of urinary organ, unspecified              |
| C69.   | Malignant neoplasm of eye and adnexa                          |
| C69.0  | Malignant neoplasm of conjunctiva                             |
| C69.00 | Malignant neoplasm of unspecified conjunctiva                 |
| C69.01 | Malignant neoplasm of right conjunctiva                       |
| C69.02 | Malignant neoplasm of left conjunctiva                        |
| C69.1  | Malignant neoplasm of cornea                                  |
| C69.10 | Malignant neoplasm of unspecified cornea                      |
| C69.11 | Malignant neoplasm of right cornea                            |

|        |                                                                       |
|--------|-----------------------------------------------------------------------|
| C69.12 | Malignant neoplasm of left cornea                                     |
| C69.2  | Malignant neoplasm of retina                                          |
| C69.20 | Malignant neoplasm of unspecified retina                              |
| C69.21 | Malignant neoplasm of right retina                                    |
| C69.22 | Malignant neoplasm of left retina                                     |
| C69.3  | Malignant neoplasm of choroid                                         |
| C69.30 | Malignant neoplasm of unspecified choroid                             |
| C69.31 | Malignant neoplasm of right choroid                                   |
| C69.32 | Malignant neoplasm of left choroid                                    |
| C69.4  | Malignant neoplasm of ciliary body                                    |
| C69.40 | Malignant neoplasm of unspecified ciliary body                        |
| C69.41 | Malignant neoplasm of right ciliary body                              |
| C69.42 | Malignant neoplasm of left ciliary body                               |
| C69.5  | Malignant neoplasm of lacrimal gland and duct                         |
| C69.50 | Malignant neoplasm of unspecified lacrimal gland and duct             |
| C69.51 | Malignant neoplasm of right lacrimal gland and duct                   |
| C69.52 | Malignant neoplasm of left lacrimal gland and duct                    |
| C69.6  | Malignant neoplasm of orbit                                           |
| C69.60 | Malignant neoplasm of unspecified orbit                               |
| C69.61 | Malignant neoplasm of right orbit                                     |
| C69.62 | Malignant neoplasm of left orbit                                      |
| C69.8  | Malignant neoplasm of overlapping sites of eye and adnexa             |
| C69.80 | Malignant neoplasm of overlapping sites of unspecified eye and adnexa |
| C69.81 | Malignant neoplasm of overlapping sites of right eye and adnexa       |
| C69.82 | Malignant neoplasm of overlapping sites of left eye and adnexa        |
| C69.9  | Malignant neoplasm of unspecified site of eye                         |
| C69.90 | Malignant neoplasm of unspecified site of unspecified eye             |
| C69.91 | Malignant neoplasm of unspecified site of right eye                   |
| C69.92 | Malignant neoplasm of unspecified site of left eye                    |
| C70.   | Malignant neoplasm of meninges                                        |
| C70.0  | Malignant neoplasm of cerebral meninges                               |
| C70.1  | Malignant neoplasm of spinal meninges                                 |
| C70.9  | Malignant neoplasm of meninges, unspecified                           |
| C71.   | Malignant neoplasm of brain                                           |

|        |                                                                                             |
|--------|---------------------------------------------------------------------------------------------|
| C71.0  | Malignant neoplasm of cerebrum, except lobes and ventricles                                 |
| C71.1  | Malignant neoplasm of frontal lobe                                                          |
| C71.2  | Malignant neoplasm of temporal lobe                                                         |
| C71.3  | Malignant neoplasm of parietal lobe                                                         |
| C71.4  | Malignant neoplasm of occipital lobe                                                        |
| C71.5  | Malignant neoplasm of cerebral ventricle                                                    |
| C71.6  | Malignant neoplasm of cerebellum                                                            |
| C71.7  | Malignant neoplasm of brain stem                                                            |
| C71.8  | Malignant neoplasm of overlapping sites of brain                                            |
| C71.9  | Malignant neoplasm of brain, unspecified                                                    |
| C72.   | Malignant neoplasm of spinal cord, cranial nerves and other parts of central nervous system |
| C72.0  | Malignant neoplasm of spinal cord                                                           |
| C72.1  | Malignant neoplasm of cauda equina                                                          |
| C72.2  | Malignant neoplasm of olfactory nerve                                                       |
| C72.20 | Malignant neoplasm of unspecified olfactory nerve                                           |
| C72.21 | Malignant neoplasm of right olfactory nerve                                                 |
| C72.22 | Malignant neoplasm of left olfactory nerve                                                  |
| C72.3  | Malignant neoplasm of optic nerve                                                           |
| C72.30 | Malignant neoplasm of unspecified optic nerve                                               |
| C72.31 | Malignant neoplasm of right optic nerve                                                     |
| C72.32 | Malignant neoplasm of left optic nerve                                                      |
| C72.4  | Malignant neoplasm of acoustic nerve                                                        |
| C72.40 | Malignant neoplasm of unspecified acoustic nerve                                            |
| C72.41 | Malignant neoplasm of right acoustic nerve                                                  |
| C72.42 | Malignant neoplasm of left acoustic nerve                                                   |
| C72.5  | Malignant neoplasm of other and unspecified cranial nerves                                  |
| C72.50 | Malignant neoplasm of unspecified cranial nerve                                             |
| C72.59 | Malignant neoplasm of other cranial nerves                                                  |
| C72.9  | Malignant neoplasm of central nervous system, unspecified                                   |
| C73.   | Malignant neoplasm of thyroid gland                                                         |
| C74.   | Malignant neoplasm of adrenal gland                                                         |
| C74.0  | Malignant neoplasm of cortex of adrenal gland                                               |
| C74.00 | Malignant neoplasm of cortex of unspecified adrenal gland                                   |
| C74.01 | Malignant neoplasm of cortex of right adrenal gland                                         |



|        |                                                                     |
|--------|---------------------------------------------------------------------|
| C74.02 | Malignant neoplasm of cortex of left adrenal gland                  |
| C74.1  | Malignant neoplasm of medulla of adrenal gland                      |
| C74.10 | Malignant neoplasm of medulla of unspecified adrenal gland          |
| C74.11 | Malignant neoplasm of medulla of right adrenal gland                |
| C74.12 | Malignant neoplasm of medulla of left adrenal gland                 |
| C74.9  | Malignant neoplasm of unspecified part of adrenal gland             |
| C74.90 | Malignant neoplasm of unspecified part of unspecified adrenal gland |
| C74.91 | Malignant neoplasm of unspecified part of right adrenal gland       |
| C74.92 | Malignant neoplasm of unspecified part of left adrenal gland        |
| C75.   | Malignant neoplasm of other endocrine glands and related structures |
| C75.0  | Malignant neoplasm of parathyroid gland                             |
| C75.1  | Malignant neoplasm of pituitary gland                               |
| C75.2  | Malignant neoplasm of craniopharyngeal duct                         |
| C75.3  | Malignant neoplasm of pineal gland                                  |
| C75.4  | Malignant neoplasm of carotid body                                  |
| C75.5  | Malignant neoplasm of aortic body and other paraganglia             |
| C75.8  | Malignant neoplasm with pluriglandular involvement, unspecified     |
| C75.9  | Malignant neoplasm of endocrine gland, unspecified                  |
| C76.   | Malignant neoplasm of other and ill-defined sites                   |
| C76.0  | Malignant neoplasm of head, face and neck                           |
| C76.1  | Malignant neoplasm of thorax                                        |
| C76.2  | Malignant neoplasm of abdomen                                       |
| C76.3  | Malignant neoplasm of pelvis                                        |
| C76.4  | Malignant neoplasm of upper limb                                    |
| C76.40 | Malignant neoplasm of unspecified upper limb                        |
| C76.41 | Malignant neoplasm of right upper limb                              |
| C76.42 | Malignant neoplasm of left upper limb                               |
| C76.5  | Malignant neoplasm of lower limb                                    |
| C76.50 | Malignant neoplasm of unspecified lower limb                        |
| C76.51 | Malignant neoplasm of right lower limb                              |
| C76.52 | Malignant neoplasm of left lower limb                               |
| C76.8  | Malignant neoplasm of other specified ill-defined sites             |

|        |                                                                                     |
|--------|-------------------------------------------------------------------------------------|
| C77.   | Secondary and unspecified malignant neoplasm of lymph nodes                         |
| C77.0  | Secondary and unspecified malignant neoplasm of lymph nodes of head, face and neck  |
| C77.1  | Secondary and unspecified malignant neoplasm of intrathoracic lymph nodes           |
| C77.2  | Secondary and unspecified malignant neoplasm of intra-abdominal lymph nodes         |
| C77.3  | Secondary and unspecified malignant neoplasm of axilla and upper limb lymph nodes   |
| C77.4  | Secondary and unspecified malignant neoplasm of inguinal and lower limb lymph nodes |
| C77.5  | Secondary and unspecified malignant neoplasm of intrapelvic lymph nodes             |
| C77.8  | Secondary and unspecified malignant neoplasm of lymph nodes of multiple regions     |
| C77.9  | Secondary and unspecified malignant neoplasm of lymph node, unspecified             |
| C78.   | Secondary malignant neoplasm of respiratory and digestive organs                    |
| C78.0  | Secondary malignant neoplasm of lung                                                |
| C78.00 | Secondary malignant neoplasm of unspecified lung                                    |
| C78.01 | Secondary malignant neoplasm of right lung                                          |
| C78.02 | Secondary malignant neoplasm of left lung                                           |
| C78.1  | Secondary malignant neoplasm of mediastinum                                         |
| C78.2  | Secondary malignant neoplasm of pleura                                              |
| C78.3  | Secondary malignant neoplasm of other and unspecified respiratory organs            |
| C78.30 | Secondary malignant neoplasm of unspecified respiratory organ                       |
| C78.39 | Secondary malignant neoplasm of other respiratory organs                            |
| C78.4  | Secondary malignant neoplasm of small intestine                                     |
| C78.5  | Secondary malignant neoplasm of large intestine and rectum                          |
| C78.6  | Secondary malignant neoplasm of retroperitoneum and peritoneum                      |
| C78.7  | Secondary malignant neoplasm of liver and intrahepatic bile duct                    |

|        |                                                                                  |
|--------|----------------------------------------------------------------------------------|
| C78.8  | Secondary malignant neoplasm of other and unspecified digestive organs           |
| C78.80 | Secondary malignant neoplasm of unspecified digestive organ                      |
| C78.89 | Secondary malignant neoplasm of other digestive organs                           |
| C79.   | Secondary malignant neoplasm of other and unspecified sites                      |
| C79.0  | Secondary malignant neoplasm of kidney and renal pelvis                          |
| C79.00 | Secondary malignant neoplasm of unspecified kidney and renal pelvis              |
| C79.01 | Secondary malignant neoplasm of right kidney and renal pelvis                    |
| C79.02 | Secondary malignant neoplasm of left kidney and renal pelvis                     |
| C79.1  | Secondary malignant neoplasm of bladder and other and unspecified urinary organs |
| C79.10 | Secondary malignant neoplasm of unspecified urinary organs                       |
| C79.11 | Secondary malignant neoplasm of bladder                                          |
| C79.19 | Secondary malignant neoplasm of other urinary organs                             |
| C79.2  | Secondary malignant neoplasm of skin                                             |
| C79.3  | Secondary malignant neoplasm of brain and cerebral meninges                      |
| C79.31 | Secondary malignant neoplasm of brain                                            |
| C79.32 | Secondary malignant neoplasm of cerebral meninges                                |
| C79.4  | Secondary malignant neoplasm of other and unspecified parts of nervous system    |
| C79.40 | Secondary malignant neoplasm of unspecified part of nervous system               |
| C79.49 | Secondary malignant neoplasm of other parts of nervous system                    |
| C79.5  | Secondary malignant neoplasm of bone and bone marrow                             |
| C79.51 | Secondary malignant neoplasm of bone                                             |
| C79.52 | Secondary malignant neoplasm of bone marrow                                      |
| C79.6  | Secondary malignant neoplasm of ovary                                            |
| C79.60 | Secondary malignant neoplasm of unspecified ovary                                |
| C79.61 | Secondary malignant neoplasm of right ovary                                      |
| C79.62 | Secondary malignant neoplasm of left ovary                                       |

|        |                                                                                                |
|--------|------------------------------------------------------------------------------------------------|
| C79.7  | Secondary malignant neoplasm of adrenal gland                                                  |
| C79.70 | Secondary malignant neoplasm of unspecified adrenal gland                                      |
| C79.71 | Secondary malignant neoplasm of right adrenal gland                                            |
| C79.72 | Secondary malignant neoplasm of left adrenal gland                                             |
| C79.8  | Secondary malignant neoplasm of other specified sites                                          |
| C79.81 | Secondary malignant neoplasm of breast                                                         |
| C79.82 | Secondary malignant neoplasm of genital organs                                                 |
| C79.89 | Secondary malignant neoplasm of other specified sites                                          |
| C79.9  | Secondary malignant neoplasm of unspecified site                                               |
| C80.   | Malignant neoplasm without specification of site                                               |
| C80.0  | Disseminated malignant neoplasm, unspecified                                                   |
| C80.1  | Malignant (primary) neoplasm, unspecified                                                      |
| C80.2  | Malignant neoplasm associated with transplanted organ                                          |
| C81.   | Hodgkin lymphoma                                                                               |
| C81.0  | Nodular lymphocyte predominant Hodgkin lymphoma                                                |
| C81.00 | Nodular lymphocyte predominant Hodgkin lymphoma, unspecified site                              |
| C81.01 | Nodular lymphocyte predominant Hodgkin lymphoma, lymph nodes of head, face, and neck           |
| C81.02 | Nodular lymphocyte predominant Hodgkin lymphoma, intrathoracic lymph nodes                     |
| C81.03 | Nodular lymphocyte predominant Hodgkin lymphoma, intra-abdominal lymph nodes                   |
| C81.04 | Nodular lymphocyte predominant Hodgkin lymphoma, lymph nodes of axilla and upper limb          |
| C81.05 | Nodular lymphocyte predominant Hodgkin lymphoma, lymph nodes of inguinal region and lower limb |
| C81.06 | Nodular lymphocyte predominant Hodgkin lymphoma, intrapelvic lymph nodes                       |
| C81.07 | Nodular lymphocyte predominant Hodgkin lymphoma, spleen                                        |
| C81.08 | Nodular lymphocyte predominant Hodgkin lymphoma, lymph nodes of multiple sites                 |
| C81.09 | Nodular lymphocyte predominant Hodgkin lymphoma, extranodal and solid organ sites              |
| C81.1  | Nodular sclerosis Hodgkin lymphoma                                                             |
| C81.10 | Nodular sclerosis Hodgkin lymphoma, unspecified site                                           |

|        |                                                                                   |
|--------|-----------------------------------------------------------------------------------|
| C81.11 | Nodular sclerosis Hodgkin lymphoma, lymph nodes of head, face, and neck           |
| C81.12 | Nodular sclerosis Hodgkin lymphoma, intrathoracic lymph nodes                     |
| C81.13 | Nodular sclerosis Hodgkin lymphoma, intra-abdominal lymph nodes                   |
| C81.14 | Nodular sclerosis Hodgkin lymphoma, lymph nodes of axilla and upper limb          |
| C81.15 | Nodular sclerosis Hodgkin lymphoma, lymph nodes of inguinal region and lower limb |
| C81.16 | Nodular sclerosis Hodgkin lymphoma, intrapelvic lymph nodes                       |
| C81.17 | Nodular sclerosis Hodgkin lymphoma, spleen                                        |
| C81.18 | Nodular sclerosis Hodgkin lymphoma, lymph nodes of multiple sites                 |
| C81.19 | Nodular sclerosis Hodgkin lymphoma, extranodal and solid organ sites              |
| C81.2  | Mixed cellularity Hodgkin lymphoma                                                |
| C81.20 | Mixed cellularity Hodgkin lymphoma, unspecified site                              |
| C81.21 | Mixed cellularity Hodgkin lymphoma, lymph nodes of head, face, and neck           |
| C81.22 | Mixed cellularity Hodgkin lymphoma, intrathoracic lymph nodes                     |
| C81.23 | Mixed cellularity Hodgkin lymphoma, intra-abdominal lymph nodes                   |
| C81.24 | Mixed cellularity Hodgkin lymphoma, lymph nodes of axilla and upper limb          |
| C81.25 | Mixed cellularity Hodgkin lymphoma, lymph nodes of inguinal region and lower limb |
| C81.26 | Mixed cellularity Hodgkin lymphoma, intrapelvic lymph nodes                       |
| C81.27 | Mixed cellularity Hodgkin lymphoma, spleen                                        |
| C81.28 | Mixed cellularity Hodgkin lymphoma, lymph nodes of multiple sites                 |
| C81.29 | Mixed cellularity Hodgkin lymphoma, extranodal and solid organ sites              |
| C81.3  | Lymphocyte depleted Hodgkin lymphoma                                              |
| C81.30 | Lymphocyte depleted Hodgkin lymphoma, unspecified site                            |

|        |                                                                                     |
|--------|-------------------------------------------------------------------------------------|
| C81.31 | Lymphocyte depleted Hodgkin lymphoma, lymph nodes of head, face, and neck           |
| C81.32 | Lymphocyte depleted Hodgkin lymphoma, intrathoracic lymph nodes                     |
| C81.33 | Lymphocyte depleted Hodgkin lymphoma, intra-abdominal lymph nodes                   |
| C81.34 | Lymphocyte depleted Hodgkin lymphoma, lymph nodes of axilla and upper limb          |
| C81.35 | Lymphocyte depleted Hodgkin lymphoma, lymph nodes of inguinal region and lower limb |
| C81.36 | Lymphocyte depleted Hodgkin lymphoma, intrapelvic lymph nodes                       |
| C81.37 | Lymphocyte depleted Hodgkin lymphoma, spleen                                        |
| C81.38 | Lymphocyte depleted Hodgkin lymphoma, lymph nodes of multiple sites                 |
| C81.39 | Lymphocyte depleted Hodgkin lymphoma, extranodal and solid organ sites              |
| C81.4  | Lymphocyte-rich Hodgkin lymphoma                                                    |
| C81.40 | Lymphocyte-rich Hodgkin lymphoma, unspecified site                                  |
| C81.41 | Lymphocyte-rich Hodgkin lymphoma, lymph nodes of head, face, and neck               |
| C81.42 | Lymphocyte-rich Hodgkin lymphoma, intrathoracic lymph nodes                         |
| C81.43 | Lymphocyte-rich Hodgkin lymphoma, intra-abdominal lymph nodes                       |
| C81.44 | Lymphocyte-rich Hodgkin lymphoma, lymph nodes of axilla and upper limb              |
| C81.45 | Lymphocyte-rich Hodgkin lymphoma, lymph nodes of inguinal region and lower limb     |
| C81.46 | Lymphocyte-rich Hodgkin lymphoma, intrapelvic lymph nodes                           |
| C81.47 | Lymphocyte-rich Hodgkin lymphoma, spleen                                            |
| C81.48 | Lymphocyte-rich Hodgkin lymphoma, lymph nodes of multiple sites                     |
| C81.49 | Lymphocyte-rich Hodgkin lymphoma, extranodal and solid organ sites                  |
| C81.7  | Other Hodgkin lymphoma                                                              |
| C81.70 | Other Hodgkin lymphoma, unspecified site                                            |

|        |                                                                              |
|--------|------------------------------------------------------------------------------|
| C81.71 | Other Hodgkin lymphoma, lymph nodes of head, face, and neck                  |
| C81.72 | Other Hodgkin lymphoma, intrathoracic lymph nodes                            |
| C81.73 | Other Hodgkin lymphoma, intra-abdominal lymph nodes                          |
| C81.74 | Other Hodgkin lymphoma, lymph nodes of axilla and upper limb                 |
| C81.75 | Other Hodgkin lymphoma, lymph nodes of inguinal region and lower limb        |
| C81.76 | Other Hodgkin lymphoma, intrapelvic lymph nodes                              |
| C81.77 | Other Hodgkin lymphoma, spleen                                               |
| C81.78 | Other Hodgkin lymphoma, lymph nodes of multiple sites                        |
| C81.79 | Other Hodgkin lymphoma, extranodal and solid organ sites                     |
| C81.9  | Hodgkin lymphoma, unspecified                                                |
| C81.90 | Hodgkin lymphoma, unspecified, unspecified site                              |
| C81.91 | Hodgkin lymphoma, unspecified, lymph nodes of head, face, and neck           |
| C81.92 | Hodgkin lymphoma, unspecified, intrathoracic lymph nodes                     |
| C81.93 | Hodgkin lymphoma, unspecified, intra-abdominal lymph nodes                   |
| C81.94 | Hodgkin lymphoma, unspecified, lymph nodes of axilla and upper limb          |
| C81.95 | Hodgkin lymphoma, unspecified, lymph nodes of inguinal region and lower limb |
| C81.96 | Hodgkin lymphoma, unspecified, intrapelvic lymph nodes                       |
| C81.97 | Hodgkin lymphoma, unspecified, spleen                                        |
| C81.98 | Hodgkin lymphoma, unspecified, lymph nodes of multiple sites                 |
| C81.99 | Hodgkin lymphoma, unspecified, extranodal and solid organ sites              |
| C82.   | Follicular lymphoma                                                          |
| C82.0  | Follicular lymphoma grade I                                                  |
| C82.00 | Follicular lymphoma grade I, unspecified site                                |
| C82.01 | Follicular lymphoma grade I, lymph nodes of head, face, and neck             |
| C82.02 | Follicular lymphoma grade I, intrathoracic lymph nodes                       |

|        |                                                                                 |
|--------|---------------------------------------------------------------------------------|
| C82.03 | Follicular lymphoma grade I, intra-abdominal lymph nodes                        |
| C82.04 | Follicular lymphoma grade I, lymph nodes of axilla and upper limb               |
| C82.05 | Follicular lymphoma grade I, lymph nodes of inguinal region and lower limb      |
| C82.06 | Follicular lymphoma grade I, intrapelvic lymph nodes                            |
| C82.07 | Follicular lymphoma grade I, spleen                                             |
| C82.08 | Follicular lymphoma grade I, lymph nodes of multiple sites                      |
| C82.09 | Follicular lymphoma grade I, extranodal and solid organ sites                   |
| C82.1  | Follicular lymphoma grade II                                                    |
| C82.10 | Follicular lymphoma grade II, unspecified site                                  |
| C82.11 | Follicular lymphoma grade II, lymph nodes of head, face, and neck               |
| C82.12 | Follicular lymphoma grade II, intrathoracic lymph nodes                         |
| C82.13 | Follicular lymphoma grade II, intra-abdominal lymph nodes                       |
| C82.14 | Follicular lymphoma grade II, lymph nodes of axilla and upper limb              |
| C82.15 | Follicular lymphoma grade II, lymph nodes of inguinal region and lower limb     |
| C82.16 | Follicular lymphoma grade II, intrapelvic lymph nodes                           |
| C82.17 | Follicular lymphoma grade II, spleen                                            |
| C82.18 | Follicular lymphoma grade II, lymph nodes of multiple sites                     |
| C82.19 | Follicular lymphoma grade II, extranodal and solid organ sites                  |
| C82.2  | Follicular lymphoma grade III, unspecified                                      |
| C82.20 | Follicular lymphoma grade III, unspecified, unspecified site                    |
| C82.21 | Follicular lymphoma grade III, unspecified, lymph nodes of head, face, and neck |
| C82.22 | Follicular lymphoma grade III, unspecified, intrathoracic lymph nodes           |
| C82.23 | Follicular lymphoma grade III, unspecified, intra-abdominal lymph nodes         |



|        |                                                                                           |
|--------|-------------------------------------------------------------------------------------------|
| C82.24 | Follicular lymphoma grade III, unspecified, lymph nodes of axilla and upper limb          |
| C82.25 | Follicular lymphoma grade III, unspecified, lymph nodes of inguinal region and lower limb |
| C82.26 | Follicular lymphoma grade III, unspecified, intrapelvic lymph nodes                       |
| C82.27 | Follicular lymphoma grade III, unspecified, spleen                                        |
| C82.28 | Follicular lymphoma grade III, unspecified, lymph nodes of multiple sites                 |
| C82.29 | Follicular lymphoma grade III, unspecified, extranodal and solid organ sites              |
| C82.3  | Follicular lymphoma grade IIIa                                                            |
| C82.30 | Follicular lymphoma grade IIIa, unspecified site                                          |
| C82.31 | Follicular lymphoma grade IIIa, lymph nodes of head, face, and neck                       |
| C82.32 | Follicular lymphoma grade IIIa, intrathoracic lymph nodes                                 |
| C82.33 | Follicular lymphoma grade IIIa, intra-abdominal lymph nodes                               |
| C82.34 | Follicular lymphoma grade IIIa, lymph nodes of axilla and upper limb                      |
| C82.35 | Follicular lymphoma grade IIIa, lymph nodes of inguinal region and lower limb             |
| C82.36 | Follicular lymphoma grade IIIa, intrapelvic lymph nodes                                   |
| C82.37 | Follicular lymphoma grade IIIa, spleen                                                    |
| C82.38 | Follicular lymphoma grade IIIa, lymph nodes of multiple sites                             |
| C82.39 | Follicular lymphoma grade IIIa, extranodal and solid organ sites                          |
| C82.4  | Follicular lymphoma grade IIIb                                                            |
| C82.40 | Follicular lymphoma grade IIIb, unspecified site                                          |
| C82.41 | Follicular lymphoma grade IIIb, lymph nodes of head, face, and neck                       |
| C82.42 | Follicular lymphoma grade IIIb, intrathoracic lymph nodes                                 |
| C82.43 | Follicular lymphoma grade IIIb, intra-abdominal lymph nodes                               |
| C82.44 | Follicular lymphoma grade IIIb, lymph nodes of axilla and upper limb                      |

|        |                                                                                   |
|--------|-----------------------------------------------------------------------------------|
| C82.45 | Follicular lymphoma grade IIIb, lymph nodes of inguinal region and lower limb     |
| C82.46 | Follicular lymphoma grade IIIb, intrapelvic lymph nodes                           |
| C82.47 | Follicular lymphoma grade IIIb, spleen                                            |
| C82.48 | Follicular lymphoma grade IIIb, lymph nodes of multiple sites                     |
| C82.49 | Follicular lymphoma grade IIIb, extranodal and solid organ sites                  |
| C82.5  | Diffuse follicle center lymphoma                                                  |
| C82.50 | Diffuse follicle center lymphoma, unspecified site                                |
| C82.51 | Diffuse follicle center lymphoma, lymph nodes of head, face, and neck             |
| C82.52 | Diffuse follicle center lymphoma, intrathoracic lymph nodes                       |
| C82.53 | Diffuse follicle center lymphoma, intra-abdominal lymph nodes                     |
| C82.54 | Diffuse follicle center lymphoma, lymph nodes of axilla and upper limb            |
| C82.55 | Diffuse follicle center lymphoma, lymph nodes of inguinal region and lower limb   |
| C82.56 | Diffuse follicle center lymphoma, intrapelvic lymph nodes                         |
| C82.57 | Diffuse follicle center lymphoma, spleen                                          |
| C82.58 | Diffuse follicle center lymphoma, lymph nodes of multiple sites                   |
| C82.59 | Diffuse follicle center lymphoma, extranodal and solid organ sites                |
| C82.6  | Cutaneous follicle center lymphoma                                                |
| C82.60 | Cutaneous follicle center lymphoma, unspecified site                              |
| C82.61 | Cutaneous follicle center lymphoma, lymph nodes of head, face, and neck           |
| C82.62 | Cutaneous follicle center lymphoma, intrathoracic lymph nodes                     |
| C82.63 | Cutaneous follicle center lymphoma, intra-abdominal lymph nodes                   |
| C82.64 | Cutaneous follicle center lymphoma, lymph nodes of axilla and upper limb          |
| C82.65 | Cutaneous follicle center lymphoma, lymph nodes of inguinal region and lower limb |

|        |                                                                                   |
|--------|-----------------------------------------------------------------------------------|
| C82.66 | Cutaneous follicle center lymphoma, intrapelvic lymph nodes                       |
| C82.67 | Cutaneous follicle center lymphoma, spleen                                        |
| C82.68 | Cutaneous follicle center lymphoma, lymph nodes of multiple sites                 |
| C82.69 | Cutaneous follicle center lymphoma, extranodal and solid organ sites              |
| C82.8  | Other types of follicular lymphoma                                                |
| C82.80 | Other types of follicular lymphoma, unspecified site                              |
| C82.81 | Other types of follicular lymphoma, lymph nodes of head, face, and neck           |
| C82.82 | Other types of follicular lymphoma, intrathoracic lymph nodes                     |
| C82.83 | Other types of follicular lymphoma, intra-abdominal lymph nodes                   |
| C82.84 | Other types of follicular lymphoma, lymph nodes of axilla and upper limb          |
| C82.85 | Other types of follicular lymphoma, lymph nodes of inguinal region and lower limb |
| C82.86 | Other types of follicular lymphoma, intrapelvic lymph nodes                       |
| C82.87 | Other types of follicular lymphoma, spleen                                        |
| C82.88 | Other types of follicular lymphoma, lymph nodes of multiple sites                 |
| C82.89 | Other types of follicular lymphoma, extranodal and solid organ sites              |
| C82.9  | Follicular lymphoma, unspecified                                                  |
| C82.90 | Follicular lymphoma, unspecified, unspecified site                                |
| C82.91 | Follicular lymphoma, unspecified, lymph nodes of head, face, and neck             |
| C82.92 | Follicular lymphoma, unspecified, intrathoracic lymph nodes                       |
| C82.93 | Follicular lymphoma, unspecified, intra-abdominal lymph nodes                     |
| C82.94 | Follicular lymphoma, unspecified, lymph nodes of axilla and upper limb            |
| C82.95 | Follicular lymphoma, unspecified, lymph nodes of inguinal region and lower limb   |

|        |                                                                           |
|--------|---------------------------------------------------------------------------|
| C82.96 | Follicular lymphoma, unspecified, intrapelvic lymph nodes                 |
| C82.97 | Follicular lymphoma, unspecified, spleen                                  |
| C82.98 | Follicular lymphoma, unspecified, lymph nodes of multiple sites           |
| C82.99 | Follicular lymphoma, unspecified, extranodal and solid organ sites        |
| C83.   | Non-follicular lymphoma                                                   |
| C83.0  | Small cell B-cell lymphoma                                                |
| C83.00 | Small cell B-cell lymphoma, unspecified site                              |
| C83.01 | Small cell B-cell lymphoma, lymph nodes of head, face, and neck           |
| C83.02 | Small cell B-cell lymphoma, intrathoracic lymph nodes                     |
| C83.03 | Small cell B-cell lymphoma, intra-abdominal lymph nodes                   |
| C83.04 | Small cell B-cell lymphoma, lymph nodes of axilla and upper limb          |
| C83.05 | Small cell B-cell lymphoma, lymph nodes of inguinal region and lower limb |
| C83.06 | Small cell B-cell lymphoma, intrapelvic lymph nodes                       |
| C83.07 | Small cell B-cell lymphoma, spleen                                        |
| C83.08 | Small cell B-cell lymphoma, lymph nodes of multiple sites                 |
| C83.09 | Small cell B-cell lymphoma, extranodal and solid organ sites              |
| C83.1  | Mantle cell lymphoma                                                      |
| C83.10 | Mantle cell lymphoma, unspecified site                                    |
| C83.11 | Mantle cell lymphoma, lymph nodes of head, face, and neck                 |
| C83.12 | Mantle cell lymphoma, intrathoracic lymph nodes                           |
| C83.13 | Mantle cell lymphoma, intra-abdominal lymph nodes                         |
| C83.14 | Mantle cell lymphoma, lymph nodes of axilla and upper limb                |
| C83.15 | Mantle cell lymphoma, lymph nodes of inguinal region and lower limb       |
| C83.16 | Mantle cell lymphoma, intrapelvic lymph nodes                             |
| C83.17 | Mantle cell lymphoma, spleen                                              |
| C83.18 | Mantle cell lymphoma, lymph nodes of multiple sites                       |
| C83.19 | Mantle cell lymphoma, extranodal and solid organ sites                    |
| C83.3  | Diffuse large B-cell lymphoma                                             |

|        |                                                                                 |
|--------|---------------------------------------------------------------------------------|
| C83.30 | Diffuse large B-cell lymphoma, unspecified site                                 |
| C83.31 | Diffuse large B-cell lymphoma, lymph nodes of head, face, and neck              |
| C83.32 | Diffuse large B-cell lymphoma, intrathoracic lymph nodes                        |
| C83.33 | Diffuse large B-cell lymphoma, intra-abdominal lymph nodes                      |
| C83.34 | Diffuse large B-cell lymphoma, lymph nodes of axilla and upper limb             |
| C83.35 | Diffuse large B-cell lymphoma, lymph nodes of inguinal region and lower limb    |
| C83.36 | Diffuse large B-cell lymphoma, intrapelvic lymph nodes                          |
| C83.37 | Diffuse large B-cell lymphoma, spleen                                           |
| C83.38 | Diffuse large B-cell lymphoma, lymph nodes of multiple sites                    |
| C83.39 | Diffuse large B-cell lymphoma, extranodal and solid organ sites                 |
| C83.5  | Lymphoblastic (diffuse) lymphoma                                                |
| C83.50 | Lymphoblastic (diffuse) lymphoma, unspecified site                              |
| C83.51 | Lymphoblastic (diffuse) lymphoma, lymph nodes of head, face, and neck           |
| C83.52 | Lymphoblastic (diffuse) lymphoma, intrathoracic lymph nodes                     |
| C83.53 | Lymphoblastic (diffuse) lymphoma, intra-abdominal lymph nodes                   |
| C83.54 | Lymphoblastic (diffuse) lymphoma, lymph nodes of axilla and upper limb          |
| C83.55 | Lymphoblastic (diffuse) lymphoma, lymph nodes of inguinal region and lower limb |
| C83.56 | Lymphoblastic (diffuse) lymphoma, intrapelvic lymph nodes                       |
| C83.57 | Lymphoblastic (diffuse) lymphoma, spleen                                        |
| C83.58 | Lymphoblastic (diffuse) lymphoma, lymph nodes of multiple sites                 |
| C83.59 | Lymphoblastic (diffuse) lymphoma, extranodal and solid organ sites              |
| C83.7  | Burkitt lymphoma                                                                |
| C83.70 | Burkitt lymphoma, unspecified site                                              |
| C83.71 | Burkitt lymphoma, lymph nodes of head, face, and neck                           |
| C83.72 | Burkitt lymphoma, intrathoracic lymph nodes                                     |

|        |                                                                                               |
|--------|-----------------------------------------------------------------------------------------------|
| C83.73 | Burkitt lymphoma, intra-abdominal lymph nodes                                                 |
| C83.74 | Burkitt lymphoma, lymph nodes of axilla and upper limb                                        |
| C83.75 | Burkitt lymphoma, lymph nodes of inguinal region and lower limb                               |
| C83.76 | Burkitt lymphoma, intrapelvic lymph nodes                                                     |
| C83.77 | Burkitt lymphoma, spleen                                                                      |
| C83.78 | Burkitt lymphoma, lymph nodes of multiple sites                                               |
| C83.79 | Burkitt lymphoma, extranodal and solid organ sites                                            |
| C83.8  | Other non-follicular lymphoma                                                                 |
| C83.80 | Other non-follicular lymphoma, unspecified site                                               |
| C83.81 | Other non-follicular lymphoma, lymph nodes of head, face, and neck                            |
| C83.82 | Other non-follicular lymphoma, intrathoracic lymph nodes                                      |
| C83.83 | Other non-follicular lymphoma, intra-abdominal lymph nodes                                    |
| C83.84 | Other non-follicular lymphoma, lymph nodes of axilla and upper limb                           |
| C83.85 | Other non-follicular lymphoma, lymph nodes of inguinal region and lower limb                  |
| C83.86 | Other non-follicular lymphoma, intrapelvic lymph nodes                                        |
| C83.87 | Other non-follicular lymphoma, spleen                                                         |
| C83.88 | Other non-follicular lymphoma, lymph nodes of multiple sites                                  |
| C83.89 | Other non-follicular lymphoma, extranodal and solid organ sites                               |
| C83.9  | Non-follicular (diffuse) lymphoma, unspecified                                                |
| C83.90 | Non-follicular (diffuse) lymphoma, unspecified, unspecified site                              |
| C83.91 | Non-follicular (diffuse) lymphoma, unspecified, lymph nodes of head, face, and neck           |
| C83.92 | Non-follicular (diffuse) lymphoma, unspecified, intrathoracic lymph nodes                     |
| C83.93 | Non-follicular (diffuse) lymphoma, unspecified, intra-abdominal lymph nodes                   |
| C83.94 | Non-follicular (diffuse) lymphoma, unspecified, lymph nodes of axilla and upper limb          |
| C83.95 | Non-follicular (diffuse) lymphoma, unspecified, lymph nodes of inguinal region and lower limb |

|        |                                                                                  |
|--------|----------------------------------------------------------------------------------|
| C83.96 | Non-follicular (diffuse) lymphoma, unspecified, intrapelvic lymph nodes          |
| C83.97 | Non-follicular (diffuse) lymphoma, unspecified, spleen                           |
| C83.98 | Non-follicular (diffuse) lymphoma, unspecified, lymph nodes of multiple sites    |
| C83.99 | Non-follicular (diffuse) lymphoma, unspecified, extranodal and solid organ sites |
| C84.   | Mature T/NK-cell lymphomas                                                       |
| C84.0  | Mycosis fungoides                                                                |
| C84.00 | Mycosis fungoides, unspecified site                                              |
| C84.01 | Mycosis fungoides, lymph nodes of head, face, and neck                           |
| C84.02 | Mycosis fungoides, intrathoracic lymph nodes                                     |
| C84.03 | Mycosis fungoides, intra-abdominal lymph nodes                                   |
| C84.04 | Mycosis fungoides, lymph nodes of axilla and upper limb                          |
| C84.05 | Mycosis fungoides, lymph nodes of inguinal region and lower limb                 |
| C84.06 | Mycosis fungoides, intrapelvic lymph nodes                                       |
| C84.07 | Mycosis fungoides, spleen                                                        |
| C84.08 | Mycosis fungoides, lymph nodes of multiple sites                                 |
| C84.09 | Mycosis fungoides, extranodal and solid organ sites                              |
| C84.1  | Sezary disease                                                                   |
| C84.10 | Sezary disease, unspecified site                                                 |
| C84.11 | Sezary disease, lymph nodes of head, face, and neck                              |
| C84.12 | Sezary disease, intrathoracic lymph nodes                                        |
| C84.13 | Sezary disease, intra-abdominal lymph nodes                                      |
| C84.14 | Sezary disease, lymph nodes of axilla and upper limb                             |
| C84.15 | Sezary disease, lymph nodes of inguinal region and lower limb                    |
| C84.16 | Sezary disease, intrapelvic lymph nodes                                          |
| C84.17 | Sezary disease, spleen                                                           |
| C84.18 | Sezary disease, lymph nodes of multiple sites                                    |
| C84.19 | Sezary disease, extranodal and solid organ sites                                 |
| C84.4  | Peripheral T-cell lymphoma, not classified                                       |
| C84.40 | Peripheral T-cell lymphoma, not classified, unspecified site                     |
| C84.41 | Peripheral T-cell lymphoma, not classified, lymph nodes of head, face, and neck  |
| C84.42 | Peripheral T-cell lymphoma, not classified, intrathoracic lymph nodes            |

|        |                                                                                             |
|--------|---------------------------------------------------------------------------------------------|
| C84.43 | Peripheral T-cell lymphoma, not classified, intra-abdominal lymph nodes                     |
| C84.44 | Peripheral T-cell lymphoma, not classified, lymph nodes of axilla and upper limb            |
| C84.45 | Peripheral T-cell lymphoma, not classified, lymph nodes of inguinal region and lower limb   |
| C84.46 | Peripheral T-cell lymphoma, not classified, intrapelvic lymph nodes                         |
| C84.47 | Peripheral T-cell lymphoma, not classified, spleen                                          |
| C84.48 | Peripheral T-cell lymphoma, not classified, lymph nodes of multiple sites                   |
| C84.49 | Peripheral T-cell lymphoma, not classified, extranodal and solid organ sites                |
| C84.6  | Anaplastic large cell lymphoma, ALK-positive                                                |
| C84.60 | Anaplastic large cell lymphoma, ALK-positive, unspecified site                              |
| C84.61 | Anaplastic large cell lymphoma, ALK-positive, lymph nodes of head, face, and neck           |
| C84.62 | Anaplastic large cell lymphoma, ALK-positive, intrathoracic lymph nodes                     |
| C84.63 | Anaplastic large cell lymphoma, ALK-positive, intra-abdominal lymph nodes                   |
| C84.64 | Anaplastic large cell lymphoma, ALK-positive, lymph nodes of axilla and upper limb          |
| C84.65 | Anaplastic large cell lymphoma, ALK-positive, lymph nodes of inguinal region and lower limb |
| C84.66 | Anaplastic large cell lymphoma, ALK-positive, intrapelvic lymph nodes                       |
| C84.67 | Anaplastic large cell lymphoma, ALK-positive, spleen                                        |
| C84.68 | Anaplastic large cell lymphoma, ALK-positive, lymph nodes of multiple sites                 |
| C84.69 | Anaplastic large cell lymphoma, ALK-positive, extranodal and solid organ sites              |
| C84.7  | Anaplastic large cell lymphoma, ALK-negative                                                |
| C84.70 | Anaplastic large cell lymphoma, ALK-negative, unspecified site                              |
| C84.71 | Anaplastic large cell lymphoma, ALK-negative, lymph nodes of head, face, and neck           |



|        |                                                                                             |
|--------|---------------------------------------------------------------------------------------------|
| C84.72 | Anaplastic large cell lymphoma, ALK-negative, intrathoracic lymph nodes                     |
| C84.73 | Anaplastic large cell lymphoma, ALK-negative, intra-abdominal lymph nodes                   |
| C84.74 | Anaplastic large cell lymphoma, ALK-negative, lymph nodes of axilla and upper limb          |
| C84.75 | Anaplastic large cell lymphoma, ALK-negative, lymph nodes of inguinal region and lower limb |
| C84.76 | Anaplastic large cell lymphoma, ALK-negative, intrapelvic lymph nodes                       |
| C84.77 | Anaplastic large cell lymphoma, ALK-negative, spleen                                        |
| C84.78 | Anaplastic large cell lymphoma, ALK-negative, lymph nodes of multiple sites                 |
| C84.79 | Anaplastic large cell lymphoma, ALK-negative, extranodal and solid organ sites              |
| C84.9  | Mature T/NK-cell lymphomas, unspecified                                                     |
| C84.90 | Mature T/NK-cell lymphomas, unspecified, unspecified site                                   |
| C84.91 | Mature T/NK-cell lymphomas, unspecified, lymph nodes of head, face, and neck                |
| C84.92 | Mature T/NK-cell lymphomas, unspecified, intrathoracic lymph nodes                          |
| C84.93 | Mature T/NK-cell lymphomas, unspecified, intra-abdominal lymph nodes                        |
| C84.94 | Mature T/NK-cell lymphomas, unspecified, lymph nodes of axilla and upper limb               |
| C84.95 | Mature T/NK-cell lymphomas, unspecified, lymph nodes of inguinal region and lower limb      |
| C84.96 | Mature T/NK-cell lymphomas, unspecified, intrapelvic lymph nodes                            |
| C84.97 | Mature T/NK-cell lymphomas, unspecified, spleen                                             |
| C84.98 | Mature T/NK-cell lymphomas, unspecified, lymph nodes of multiple sites                      |
| C84.99 | Mature T/NK-cell lymphomas, unspecified, extranodal and solid organ sites                   |
| C84.A  | Cutaneous T-cell lymphoma, unspecified                                                      |
| C84.A0 | Cutaneous T-cell lymphoma, unspecified, unspecified site                                    |
| C84.A1 | Cutaneous T-cell lymphoma, unspecified lymph nodes of head, face, and neck                  |

|        |                                                                                       |
|--------|---------------------------------------------------------------------------------------|
| C84.A2 | Cutaneous T-cell lymphoma, unspecified, intrathoracic lymph nodes                     |
| C84.A3 | Cutaneous T-cell lymphoma, unspecified, intra-abdominal lymph nodes                   |
| C84.A4 | Cutaneous T-cell lymphoma, unspecified, lymph nodes of axilla and upper limb          |
| C84.A5 | Cutaneous T-cell lymphoma, unspecified, lymph nodes of inguinal region and lower limb |
| C84.A6 | Cutaneous T-cell lymphoma, unspecified, intrapelvic lymph nodes                       |
| C84.A7 | Cutaneous T-cell lymphoma, unspecified, spleen                                        |
| C84.A8 | Cutaneous T-cell lymphoma, unspecified, lymph nodes of multiple sites                 |
| C84.A9 | Cutaneous T-cell lymphoma, unspecified, extranodal and solid organ sites              |
| C84.Z  | Other mature T/NK-cell lymphomas                                                      |
| C84.Z0 | Other mature T/NK-cell lymphomas, unspecified site                                    |
| C84.Z1 | Other mature T/NK-cell lymphomas, lymph nodes of head, face, and neck                 |
| C84.Z2 | Other mature T/NK-cell lymphomas, intrathoracic lymph nodes                           |
| C84.Z3 | Other mature T/NK-cell lymphomas, intra-abdominal lymph nodes                         |
| C84.Z4 | Other mature T/NK-cell lymphomas, lymph nodes of axilla and upper limb                |
| C84.Z5 | Other mature T/NK-cell lymphomas, lymph nodes of inguinal region and lower limb       |
| C84.Z6 | Other mature T/NK-cell lymphomas, intrapelvic lymph nodes                             |
| C84.Z7 | Other mature T/NK-cell lymphomas, spleen                                              |
| C84.Z8 | Other mature T/NK-cell lymphomas, lymph nodes of multiple sites                       |
| C84.Z9 | Other mature T/NK-cell lymphomas, extranodal and solid organ sites                    |
| C85.   | Other specified and unspecified types of non-Hodgkin lymphoma                         |
| C85.1  | Unspecified B-cell lymphoma                                                           |
| C85.10 | Unspecified B-cell lymphoma, unspecified site                                         |

|        |                                                                                           |
|--------|-------------------------------------------------------------------------------------------|
| C85.11 | Unspecified B-cell lymphoma, lymph nodes of head, face, and neck                          |
| C85.12 | Unspecified B-cell lymphoma, intrathoracic lymph nodes                                    |
| C85.13 | Unspecified B-cell lymphoma, intra-abdominal lymph nodes                                  |
| C85.14 | Unspecified B-cell lymphoma, lymph nodes of axilla and upper limb                         |
| C85.15 | Unspecified B-cell lymphoma, lymph nodes of inguinal region and lower limb                |
| C85.16 | Unspecified B-cell lymphoma, intrapelvic lymph nodes                                      |
| C85.17 | Unspecified B-cell lymphoma, spleen                                                       |
| C85.18 | Unspecified B-cell lymphoma, lymph nodes of multiple sites                                |
| C85.19 | Unspecified B-cell lymphoma, extranodal and solid organ sites                             |
| C85.2  | Mediastinal (thymic) large B-cell lymphoma                                                |
| C85.20 | Mediastinal (thymic) large B-cell lymphoma, unspecified site                              |
| C85.21 | Mediastinal (thymic) large B-cell lymphoma, lymph nodes of head, face, and neck           |
| C85.22 | Mediastinal (thymic) large B-cell lymphoma, intrathoracic lymph nodes                     |
| C85.23 | Mediastinal (thymic) large B-cell lymphoma, intra-abdominal lymph nodes                   |
| C85.24 | Mediastinal (thymic) large B-cell lymphoma, lymph nodes of axilla and upper limb          |
| C85.25 | Mediastinal (thymic) large B-cell lymphoma, lymph nodes of inguinal region and lower limb |
| C85.26 | Mediastinal (thymic) large B-cell lymphoma, intrapelvic lymph nodes                       |
| C85.27 | Mediastinal (thymic) large B-cell lymphoma, spleen                                        |
| C85.28 | Mediastinal (thymic) large B-cell lymphoma, lymph nodes of multiple sites                 |
| C85.29 | Mediastinal (thymic) large B-cell lymphoma, extranodal and solid organ sites              |
| C85.8  | Other specified types of non-Hodgkin lymphoma                                             |
| C85.80 | Other specified types of non-Hodgkin lymphoma, unspecified site                           |

|        |                                                                                              |
|--------|----------------------------------------------------------------------------------------------|
| C85.81 | Other specified types of non-Hodgkin lymphoma, lymph nodes of head, face, and neck           |
| C85.82 | Other specified types of non-Hodgkin lymphoma, intrathoracic lymph nodes                     |
| C85.83 | Other specified types of non-Hodgkin lymphoma, intra-abdominal lymph nodes                   |
| C85.84 | Other specified types of non-Hodgkin lymphoma, lymph nodes of axilla and upper limb          |
| C85.85 | Other specified types of non-Hodgkin lymphoma, lymph nodes of inguinal region and lower limb |
| C85.86 | Other specified types of non-Hodgkin lymphoma, intrapelvic lymph nodes                       |
| C85.87 | Other specified types of non-Hodgkin lymphoma, spleen                                        |
| C85.88 | Other specified types of non-Hodgkin lymphoma, lymph nodes of multiple sites                 |
| C85.89 | Other specified types of non-Hodgkin lymphoma, extranodal and solid organ sites              |
| C85.9  | Non-Hodgkin lymphoma, unspecified                                                            |
| C85.90 | Non-Hodgkin lymphoma, unspecified, unspecified site                                          |
| C85.91 | Non-Hodgkin lymphoma, unspecified, lymph nodes of head, face, and neck                       |
| C85.92 | Non-Hodgkin lymphoma, unspecified, intrathoracic lymph nodes                                 |
| C85.93 | Non-Hodgkin lymphoma, unspecified, intra-abdominal lymph nodes                               |
| C85.94 | Non-Hodgkin lymphoma, unspecified, lymph nodes of axilla and upper limb                      |
| C85.95 | Non-Hodgkin lymphoma, unspecified, lymph nodes of inguinal region and lower limb             |
| C85.96 | Non-Hodgkin lymphoma, unspecified, intrapelvic lymph nodes                                   |
| C85.97 | Non-Hodgkin lymphoma, unspecified, spleen                                                    |
| C85.98 | Non-Hodgkin lymphoma, unspecified, lymph nodes of multiple sites                             |
| C85.99 | Non-Hodgkin lymphoma, unspecified, extranodal and solid organ sites                          |
| C88.   | Malignant immunoproliferative diseases and certain other B-cell lymphomas                    |
| C88.0  | Waldenstrom macroglobulinemia                                                                |

|        |                                                                                               |
|--------|-----------------------------------------------------------------------------------------------|
| C88.2  | Heavy chain disease                                                                           |
| C88.3  | Immunoproliferative small intestinal disease                                                  |
| C88.4  | Extranodal marginal zone B-cell lymphoma of mucosa-associated lymphoid tissue [MALT-lymphoma] |
| C88.8  | Other malignant immunoproliferative diseases                                                  |
| C88.9  | Malignant immunoproliferative disease, unspecified                                            |
| C90.   | Multiple myeloma and malignant plasma cell neoplasms                                          |
| C90.0  | Multiple myeloma                                                                              |
| C90.00 | Multiple myeloma not having achieved remission                                                |
| C90.01 | Multiple myeloma in remission                                                                 |
| C90.02 | Multiple myeloma in relapse                                                                   |
| C90.1  | Plasma cell leukemia                                                                          |
| C90.10 | Plasma cell leukemia not having achieved remission                                            |
| C90.11 | Plasma cell leukemia in remission                                                             |
| C90.12 | Plasma cell leukemia in relapse                                                               |
| C90.2  | Extramedullary plasmacytoma                                                                   |
| C90.20 | Extramedullary plasmacytoma not having achieved remission                                     |
| C90.21 | Extramedullary plasmacytoma in remission                                                      |
| C90.22 | Extramedullary plasmacytoma in relapse                                                        |
| C90.3  | Solitary plasmacytoma                                                                         |
| C90.30 | Solitary plasmacytoma not having achieved remission                                           |
| C90.31 | Solitary plasmacytoma in remission                                                            |
| C90.32 | Solitary plasmacytoma in relapse                                                              |
| C91.   | Lymphoid leukemia                                                                             |
| C91.0  | Acute lymphoblastic leukemia [ALL]                                                            |
| C91.00 | Acute lymphoblastic leukemia not having achieved remission                                    |
| C91.01 | Acute lymphoblastic leukemia, in remission                                                    |
| C91.02 | Acute lymphoblastic leukemia, in relapse                                                      |
| C91.1  | Chronic lymphocytic leukemia of B-cell type                                                   |
| C91.10 | Chronic lymphocytic leukemia of B-cell type not having achieved remission                     |
| C91.11 | Chronic lymphocytic leukemia of B-cell type in remission                                      |
| C91.12 | Chronic lymphocytic leukemia of B-cell type in relapse                                        |
| C91.3  | Prolymphocytic leukemia of B-cell type                                                        |
| C91.30 | Prolymphocytic leukemia of B-cell type not having achieved remission                          |
| C91.31 | Prolymphocytic leukemia of B-cell type, in remission                                          |

|        |                                                                                  |
|--------|----------------------------------------------------------------------------------|
| C91.32 | Prolymphocytic leukemia of B-cell type, in relapse                               |
| C91.4  | Hairy cell leukemia                                                              |
| C91.40 | Hairy cell leukemia not having achieved remission                                |
| C91.41 | Hairy cell leukemia, in remission                                                |
| C91.42 | Hairy cell leukemia, in relapse                                                  |
| C91.5  | Adult T-cell lymphoma/leukemia (HTLV-1-associated)                               |
| C91.50 | Adult T-cell lymphoma/leukemia (HTLV-1-associated) not having achieved remission |
| C91.51 | Adult T-cell lymphoma/leukemia (HTLV-1-associated), in remission                 |
| C91.52 | Adult T-cell lymphoma/leukemia (HTLV-1-associated), in relapse                   |
| C91.6  | Prolymphocytic leukemia of T-cell type                                           |
| C91.60 | Prolymphocytic leukemia of T-cell type not having achieved remission             |
| C91.61 | Prolymphocytic leukemia of T-cell type, in remission                             |
| C91.62 | Prolymphocytic leukemia of T-cell type, in relapse                               |
| C91.9  | Lymphoid leukemia, unspecified                                                   |
| C91.90 | Lymphoid leukemia, unspecified not having achieved remission                     |
| C91.91 | Lymphoid leukemia, unspecified, in remission                                     |
| C91.92 | Lymphoid leukemia, unspecified, in relapse                                       |
| C91.A  | Mature B-cell leukemia Burkitt-type                                              |
| C91.A0 | Mature B-cell leukemia Burkitt-type not having achieved remission                |
| C91.A1 | Mature B-cell leukemia Burkitt-type, in remission                                |
| C91.A2 | Mature B-cell leukemia Burkitt-type, in relapse                                  |
| C91.Z  | Other lymphoid leukemia                                                          |
| C91.Z0 | Other lymphoid leukemia not having achieved remission                            |
| C91.Z1 | Other lymphoid leukemia, in remission                                            |
| C91.Z2 | Other lymphoid leukemia, in relapse                                              |
| C92.   | Myeloid leukemia                                                                 |
| C92.0  | Acute myeloblastic leukemia                                                      |
| C92.00 | Acute myeloblastic leukemia, not having achieved remission                       |
| C92.01 | Acute myeloblastic leukemia, in remission                                        |
| C92.02 | Acute myeloblastic leukemia, in relapse                                          |
| C92.1  | Chronic myeloid leukemia, BCR/ABL-positive                                       |

|        |                                                                                    |
|--------|------------------------------------------------------------------------------------|
| C92.10 | Chronic myeloid leukemia, BCR/ABL-positive, not having achieved remission          |
| C92.11 | Chronic myeloid leukemia, BCR/ABL-positive, in remission                           |
| C92.12 | Chronic myeloid leukemia, BCR/ABL-positive, in relapse                             |
| C92.2  | Atypical chronic myeloid leukemia, BCR/ABL-negative                                |
| C92.20 | Atypical chronic myeloid leukemia, BCR/ABL-negative, not having achieved remission |
| C92.21 | Atypical chronic myeloid leukemia, BCR/ABL-negative, in remission                  |
| C92.22 | Atypical chronic myeloid leukemia, BCR/ABL-negative, in relapse                    |
| C92.3  | Myeloid sarcoma                                                                    |
| C92.30 | Myeloid sarcoma, not having achieved remission                                     |
| C92.31 | Myeloid sarcoma, in remission                                                      |
| C92.32 | Myeloid sarcoma, in relapse                                                        |
| C92.4  | Acute promyelocytic leukemia                                                       |
| C92.40 | Acute promyelocytic leukemia, not having achieved remission                        |
| C92.41 | Acute promyelocytic leukemia, in remission                                         |
| C92.42 | Acute promyelocytic leukemia, in relapse                                           |
| C92.5  | Acute myelomonocytic leukemia                                                      |
| C92.50 | Acute myelomonocytic leukemia, not having achieved remission                       |
| C92.51 | Acute myelomonocytic leukemia, in remission                                        |
| C92.52 | Acute myelomonocytic leukemia, in relapse                                          |
| C92.6  | Acute myeloid leukemia with 11q23-abnormality                                      |
| C92.60 | Acute myeloid leukemia with 11q23-abnormality not having achieved remission        |
| C92.61 | Acute myeloid leukemia with 11q23-abnormality in remission                         |
| C92.62 | Acute myeloid leukemia with 11q23-abnormality in relapse                           |
| C92.9  | Myeloid leukemia, unspecified                                                      |
| C92.90 | Myeloid leukemia, unspecified, not having achieved remission                       |
| C92.91 | Myeloid leukemia, unspecified in remission                                         |
| C92.92 | Myeloid leukemia, unspecified in relapse                                           |
| C92.A  | Acute myeloid leukemia with multilineage dysplasia                                 |

|        |                                                                                   |
|--------|-----------------------------------------------------------------------------------|
| C92.A0 | Acute myeloid leukemia with multilineage dysplasia, not having achieved remission |
| C92.A1 | Acute myeloid leukemia with multilineage dysplasia, in remission                  |
| C92.A2 | Acute myeloid leukemia with multilineage dysplasia, in relapse                    |
| C92.Z  | Other myeloid leukemia                                                            |
| C92.Z0 | Other myeloid leukemia not having achieved remission                              |
| C92.Z1 | Other myeloid leukemia, in remission                                              |
| C92.Z2 | Other myeloid leukemia, in relapse                                                |
| C93.   | Monocytic leukemia                                                                |
| C93.0  | Acute monoblastic/monocytic leukemia                                              |
| C93.00 | Acute monoblastic/monocytic leukemia, not having achieved remission               |
| C93.01 | Acute monoblastic/monocytic leukemia, in remission                                |
| C93.02 | Acute monoblastic/monocytic leukemia, in relapse                                  |
| C93.1  | Chronic myelomonocytic leukemia                                                   |
| C93.10 | Chronic myelomonocytic leukemia not having achieved remission                     |
| C93.11 | Chronic myelomonocytic leukemia, in remission                                     |
| C93.12 | Chronic myelomonocytic leukemia, in relapse                                       |
| C93.3  | Juvenile myelomonocytic leukemia                                                  |
| C93.30 | Juvenile myelomonocytic leukemia, not having achieved remission                   |
| C93.31 | Juvenile myelomonocytic leukemia, in remission                                    |
| C93.32 | Juvenile myelomonocytic leukemia, in relapse                                      |
| C93.9  | Monocytic leukemia, unspecified                                                   |
| C93.90 | Monocytic leukemia, unspecified, not having achieved remission                    |
| C93.91 | Monocytic leukemia, unspecified in remission                                      |
| C93.92 | Monocytic leukemia, unspecified in relapse                                        |
| C93.Z  | Other monocytic leukemia                                                          |
| C93.Z0 | Other monocytic leukemia, not having achieved remission                           |
| C93.Z1 | Other monocytic leukemia, in remission                                            |
| C93.Z2 | Other monocytic leukemia, in relapse                                              |
| C94.   | Other leukemias of specified cell type                                            |
| C94.0  | Acute erythroid leukemia                                                          |
| C94.00 | Acute erythroid leukemia, not having achieved remission                           |



|        |                                                                                         |
|--------|-----------------------------------------------------------------------------------------|
| C94.01 | Acute erythroid leukemia, in remission                                                  |
| C94.02 | Acute erythroid leukemia, in relapse                                                    |
| C94.2  | Acute megakaryoblastic leukemia                                                         |
| C94.20 | Acute megakaryoblastic leukemia not having achieved remission                           |
| C94.21 | Acute megakaryoblastic leukemia, in remission                                           |
| C94.22 | Acute megakaryoblastic leukemia, in relapse                                             |
| C94.3  | Mast cell leukemia                                                                      |
| C94.30 | Mast cell leukemia not having achieved remission                                        |
| C94.31 | Mast cell leukemia, in remission                                                        |
| C94.32 | Mast cell leukemia, in relapse                                                          |
| C94.4  | Acute panmyelosis with myelofibrosis                                                    |
| C94.40 | Acute panmyelosis with myelofibrosis not having achieved remission                      |
| C94.41 | Acute panmyelosis with myelofibrosis, in remission                                      |
| C94.42 | Acute panmyelosis with myelofibrosis, in relapse                                        |
| C94.6  | Myelodysplastic disease, not classified                                                 |
| C94.8  | Other specified leukemias                                                               |
| C94.80 | Other specified leukemias not having achieved remission                                 |
| C94.81 | Other specified leukemias, in remission                                                 |
| C94.82 | Other specified leukemias, in relapse                                                   |
| C95.   | Leukemia of unspecified cell type                                                       |
| C95.0  | Acute leukemia of unspecified cell type                                                 |
| C95.00 | Acute leukemia of unspecified cell type not having achieved remission                   |
| C95.01 | Acute leukemia of unspecified cell type, in remission                                   |
| C95.02 | Acute leukemia of unspecified cell type, in relapse                                     |
| C95.1  | Chronic leukemia of unspecified cell type                                               |
| C95.10 | Chronic leukemia of unspecified cell type not having achieved remission                 |
| C95.11 | Chronic leukemia of unspecified cell type, in remission                                 |
| C95.12 | Chronic leukemia of unspecified cell type, in relapse                                   |
| C95.9  | Leukemia, unspecified                                                                   |
| C95.90 | Leukemia, unspecified not having achieved remission                                     |
| C95.91 | Leukemia, unspecified, in remission                                                     |
| C95.92 | Leukemia, unspecified, in relapse                                                       |
| C96.   | Other and unspecified malignant neoplasms of lymphoid, hematopoietic and related tissue |

|                                                                  |        |                                                                                                                        |
|------------------------------------------------------------------|--------|------------------------------------------------------------------------------------------------------------------------|
|                                                                  | C96.0  | Multifocal and multisystemic (disseminated) Langerhans-cell histiocytosis                                              |
|                                                                  | C96.2  | Malignant mast cell tumor                                                                                              |
|                                                                  | C96.4  | Sarcoma of dendritic cells (accessory cells)                                                                           |
|                                                                  | C96.5  | Multifocal and unisystemic Langerhans-cell histiocytosis                                                               |
|                                                                  | C96.6  | Unifocal Langerhans-cell histiocytosis                                                                                 |
|                                                                  | C96.9  | Malignant neoplasm of lymphoid, hematopoietic and related tissue, unspecified                                          |
|                                                                  | C96.A  | Histiocytic sarcoma                                                                                                    |
|                                                                  | C96.Z  | Other specified malignant neoplasms of lymphoid, hematopoietic and related tissue                                      |
| Chronic kidney disease and indicators of end stage renal failure | 403.   | Hypertensive chronic kidney disease                                                                                    |
|                                                                  | 403.0  | Hypertensive chronic kidney disease, malignant                                                                         |
|                                                                  | 403.00 | Hypertensive chronic kidney disease, malignant, with chronic kidney disease stage I through stage IV, or unspecified   |
|                                                                  | 403.01 | Hypertensive chronic kidney disease, malignant, with chronic kidney disease stage V or end stage renal disease         |
|                                                                  | 403.1  | Hypertensive chronic kidney disease, benign                                                                            |
|                                                                  | 403.10 | Hypertensive chronic kidney disease, benign, with chronic kidney disease stage I through stage IV, or unspecified      |
|                                                                  | 403.11 | Hypertensive chronic kidney disease, benign, with chronic kidney disease stage V or end stage renal disease            |
|                                                                  | 403.9  | Hypertensive chronic kidney disease, unspecified                                                                       |
|                                                                  | 403.90 | Hypertensive chronic kidney disease, unspecified, with chronic kidney disease stage I through stage IV, or unspecified |
|                                                                  | 403.91 | Hypertensive chronic kidney disease, unspecified, with chronic kidney disease stage V or end stage renal disease       |
|                                                                  | 584.5  | Acute kidney failure with lesion of tubular necrosis                                                                   |
|                                                                  | 584.6  | Acute kidney failure with lesion of renal cortical necrosis                                                            |
|                                                                  | 584.7  | Acute kidney failure with lesion of renal medullary [papillary] necrosis                                               |
|                                                                  | 584.8  | Acute kidney failure with other specified pathological lesion in kidney                                                |
|                                                                  | 584.9  | Acute kidney failure, unspecified                                                                                      |
|                                                                  | 585.1  | Chronic kidney disease, Stage I                                                                                        |
|                                                                  | 585.2  | Chronic kidney disease, Stage II (mild)                                                                                |

|                                              |        |                                                          |
|----------------------------------------------|--------|----------------------------------------------------------|
|                                              | 585.3  | Chronic kidney disease, Stage III (moderate)             |
|                                              | 585.4  | Chronic kidney disease, Stage IV (severe)                |
|                                              | 585.5  | Chronic kidney disease, Stage V                          |
|                                              | 585.6  | End stage renal disease                                  |
|                                              | 585.9  | Chronic kidney disease, unspecified                      |
|                                              | V42.0  | Kidney replaced by transplant                            |
|                                              | V56.0  | Encounter for extracorporeal dialysis                    |
|                                              | V56.8  | Encounter for other dialysis                             |
|                                              | N17.   | Acute kidney failure                                     |
|                                              | N17.0  | Acute kidney failure with tubular necrosis               |
|                                              | N17.1  | Acute kidney failure with acute cortical necrosis        |
|                                              | N17.2  | Acute kidney failure with medullary necrosis             |
|                                              | N17.8  | Other acute kidney failure                               |
|                                              | N17.9  | Acute kidney failure, unspecified                        |
|                                              | N18.   | Chronic kidney disease (CKD)                             |
|                                              | N18.1  | Chronic kidney disease, stage 1                          |
|                                              | N18.2  | Chronic kidney disease, stage 2 (mild)                   |
|                                              | N18.3  | Chronic kidney disease, stage 3 (moderate)               |
|                                              | N18.4  | Chronic kidney disease, stage 4 (severe)                 |
|                                              | N18.5  | Chronic kidney disease, stage 5                          |
|                                              | N18.6  | End stage renal disease                                  |
|                                              | N18.9  | Chronic kidney disease, unspecified                      |
|                                              | N19.   | Unspecified kidney failure                               |
|                                              | P96.0  | Congenital renal failure                                 |
| Chronic obstructive pulmonary disease (COPD) | 490.   | Bronchitis, not specified as acute or chronic            |
|                                              | 491.0  | Simple chronic bronchitis                                |
|                                              | 491.1  | Mucopurulent chronic bronchitis                          |
|                                              | 491.20 | Obstructive chronic bronchitis without exacerbation      |
|                                              | 491.21 | Obstructive chronic bronchitis with (acute) exacerbation |
|                                              | 491.22 | Obstructive chronic bronchitis with acute bronchitis     |
|                                              | 491.8  | Other chronic bronchitis                                 |
|                                              | 491.9  | Unspecified chronic bronchitis                           |
|                                              | 492.0  | Emphysematous bleb                                       |
|                                              | 492.8  | Other emphysema                                          |
|                                              | J40.   | Bronchitis, not specified as acute or chronic            |
|                                              | J41.   | Simple and mucopurulent chronic bronchitis               |
|                                              | J41.0  | Simple chronic bronchitis                                |
|                                              | J41.1  | Mucopurulent chronic bronchitis                          |
|                                              | J41.8  | Mixed simple and mucopurulent chronic bronchitis         |

|              |        |                                                                                        |
|--------------|--------|----------------------------------------------------------------------------------------|
|              | J42.   | Unspecified chronic bronchitis                                                         |
|              | J43.   | Emphysema                                                                              |
|              | J43.0  | Unilateral pulmonary emphysema [MacLeod's syndrome]                                    |
|              | J43.1  | Panlobular emphysema                                                                   |
|              | J43.2  | Centrilobular emphysema                                                                |
|              | J43.8  | Other emphysema                                                                        |
|              | J43.9  | Emphysema, unspecified                                                                 |
|              | J44.   | Other chronic obstructive pulmonary disease                                            |
|              | J44.0  | Chronic obstructive pulmonary disease with acute lower respiratory infection           |
|              | J44.1  | Chronic obstructive pulmonary disease with (acute) exacerbation                        |
|              | J44.9  | Chronic obstructive pulmonary disease, unspecified                                     |
|              | P25.   | Interstitial emphysema and related conditions originating in the perinatal period      |
|              | P25.0  | Interstitial emphysema originating in the perinatal period                             |
|              | P25.1  | Pneumothorax originating in the perinatal period                                       |
|              | P25.2  | Pneumomediastinum originating in the perinatal period                                  |
|              | P25.3  | Pneumopericardium originating in the perinatal period                                  |
|              | P25.8  | Other conditions related to interstitial emphysema originating in the perinatal period |
| Hip fracture | 820.00 | Closed fracture of intracapsular section of neck of femur, unspecified                 |
|              | 820.01 | Closed fracture of epiphysis (separation) (upper) of neck of femur                     |
|              | 820.02 | Closed fracture of midcervical section of neck of femur                                |
|              | 820.03 | Closed fracture of base of neck of femur                                               |
|              | 820.09 | Other closed transcervical fracture of neck of femur                                   |
|              | 820.10 | Open fracture of intracapsular section of neck of femur, unspecified                   |
|              | 820.11 | Open fracture of epiphysis (separation) (upper) of neck of femur                       |
|              | 820.12 | Open fracture of midcervical section of neck of femur                                  |
|              | 820.13 | Open fracture of base of neck of femur                                                 |
|              | 820.19 | Other open transcervical fracture of neck of femur                                     |
|              | 820.20 | Closed fracture of trochanteric section of neck of femur                               |
|              | 820.21 | Closed fracture of intertrochanteric section of neck of femur                          |

|           |        |                                                                     |
|-----------|--------|---------------------------------------------------------------------|
|           | 820.22 | Closed fracture of subtrochanteric section of neck of femur         |
|           | 820.30 | Open fracture of trochanteric section of neck of femur, unspecified |
|           | 820.31 | Open fracture of intertrochanteric section of neck of femur         |
|           | 820.32 | Open fracture of subtrochanteric section of neck of femur           |
|           | 820.8  | Closed fracture of unspecified part of neck of femur                |
|           | 820.9  | Open fracture of unspecified part of neck of femur                  |
| Pneumonia | 480.0  | Pneumonia due to adenovirus                                         |
|           | 480.1  | Pneumonia due to respiratory syncytial virus                        |
|           | 480.2  | Pneumonia due to parainfluenza virus                                |
|           | 480.3  | Pneumonia due to SARS-associated coronavirus                        |
|           | 480.8  | Pneumonia due to other virus not elsewhere classified               |
|           | 480.9  | Viral pneumonia, unspecified                                        |
|           | 481.   | Pneumococcal pneumonia [Streptococcus pneumoniae pneumonia]         |
|           | 482.0  | Pneumonia due to Klebsiella pneumoniae                              |
|           | 482.1  | Pneumonia due to Pseudomonas                                        |
|           | 482.2  | Pneumonia due to Hemophilus influenzae [H. influenzae]              |
|           | 482.30 | Pneumonia due to Streptococcus, unspecified                         |
|           | 482.31 | Pneumonia due to Streptococcus, group A                             |
|           | 482.32 | Pneumonia due to Streptococcus, group B                             |
|           | 482.39 | Pneumonia due to other Streptococcus                                |
|           | 482.40 | Pneumonia due to Staphylococcus, unspecified                        |
|           | 482.41 | Methicillin susceptible pneumonia due to Staphylococcus aureus      |
|           | 482.42 | Methicillin resistant pneumonia due to Staphylococcus aureus        |
|           | 482.49 | Other Staphylococcus pneumonia                                      |
|           | 482.81 | Pneumonia due to anaerobes                                          |
|           | 482.82 | Pneumonia due to escherichia coli [E. coli]                         |
|           | 482.83 | Pneumonia due to other gram-negative bacteria                       |
|           | 482.84 | Pneumonia due to Legionnaires' disease                              |
|           | 482.89 | Pneumonia due to other specified bacteria                           |
|           | 482.9  | Bacterial pneumonia, unspecified                                    |
|           | 483.0  | Pneumonia due to mycoplasma pneumoniae                              |
|           | 483.1  | Pneumonia due to chlamydia                                          |
|           | 483.8  | Pneumonia due to other specified organism                           |

|         |                                                                |
|---------|----------------------------------------------------------------|
| 484.1   | Pneumonia in cytomegalic inclusion disease                     |
| 484.3   | Pneumonia in whooping cough                                    |
| 484.5   | Pneumonia in anthrax                                           |
| 484.6   | Pneumonia in aspergillosis                                     |
| 484.7   | Pneumonia in other systemic mycoses                            |
| 484.8   | Pneumonia in other infectious diseases classified elsewhere    |
| 485.    | Bronchopneumonia, organism unspecified                         |
| 486.    | Pneumonia, organism unspecified                                |
| 487.0   | Influenza with pneumonia                                       |
| 487.1   | Influenza with other respiratory manifestations                |
| 487.8   | Influenza with other manifestations                            |
| B01.2   | Varicella pneumonia                                            |
| B05.2   | Measles complicated by pneumonia                               |
| J12.    | Viral pneumonia, not elsewhere classified                      |
| J12.0   | Adenoviral pneumonia                                           |
| J12.1   | Respiratory syncytial virus pneumonia                          |
| J12.2   | Parainfluenza virus pneumonia                                  |
| J12.3   | Human metapneumovirus pneumonia                                |
| J12.8   | Other viral pneumonia                                          |
| J12.81  | Pneumonia due to SARS-associated coronavirus                   |
| J12.89  | Other viral pneumonia                                          |
| J12.9   | Viral pneumonia, unspecified                                   |
| J13.    | Pneumonia due to Streptococcus pneumoniae                      |
| J14.    | Pneumonia due to Hemophilus influenzae                         |
| J15.    | Bacterial pneumonia, not elsewhere classified                  |
| J15.0   | Pneumonia due to Klebsiella pneumoniae                         |
| J15.1   | Pneumonia due to Pseudomonas                                   |
| J15.2   | Pneumonia due to staphylococcus                                |
| J15.20  | Pneumonia due to staphylococcus, unspecified                   |
| J15.21  | Pneumonia due to staphylococcus aureus                         |
| J15.211 | Pneumonia due to Methicillin susceptible Staphylococcus aureus |
| J15.212 | Pneumonia due to Methicillin resistant Staphylococcus aureus   |
| J15.29  | Pneumonia due to other staphylococcus                          |
| J15.3   | Pneumonia due to streptococcus, group B                        |
| J15.4   | Pneumonia due to other streptococci                            |
| J15.5   | Pneumonia due to Escherichia coli                              |

|          |                      |                                                                       |
|----------|----------------------|-----------------------------------------------------------------------|
|          | J15.6                | Pneumonia due to other aerobic Gram-negative bacteria                 |
|          | J15.7                | Pneumonia due to Mycoplasma pneumoniae                                |
|          | J15.8                | Pneumonia due to other specified bacteria                             |
|          | J15.9                | Unspecified bacterial pneumonia                                       |
|          | J16.                 | Pneumonia due to other infectious organisms, not elsewhere classified |
|          | J16.0                | Chlamydial pneumonia                                                  |
|          | J16.8                | Pneumonia due to other specified infectious organisms                 |
|          | J18.                 | Pneumonia, unspecified organism                                       |
|          | J18.0                | Bronchopneumonia, unspecified organism                                |
|          | J18.1                | Lobar pneumonia, unspecified organism                                 |
|          | J18.2                | Hypostatic pneumonia, unspecified organism                            |
|          | J18.8                | Other pneumonia, unspecified organism                                 |
|          | J18.9                | Pneumonia, unspecified organism                                       |
|          | P23.                 | Congenital pneumonia                                                  |
|          | P23.0                | Congenital pneumonia due to viral agent                               |
|          | P23.1                | Congenital pneumonia due to Chlamydia                                 |
|          | P23.2                | Congenital pneumonia due to staphylococcus                            |
|          | P23.3                | Congenital pneumonia due to streptococcus, group B                    |
|          | P23.4                | Congenital pneumonia due to Escherichia coli                          |
|          | P23.5                | Congenital pneumonia due to Pseudomonas                               |
|          | P23.6                | Congenital pneumonia due to other bacterial agents                    |
|          | P23.8                | Congenital pneumonia due to other organisms                           |
|          | P23.9                | Congenital pneumonia, unspecified                                     |
| Dementia | 290.4                | Vascular Dementias                                                    |
|          | 290*                 | Several other dementias (*except 290.4)                               |
|          | 294                  | Persistent mental disorders due to conditions classified elsewhere    |
|          | 331                  | Alzheimer's disease                                                   |
|          | 331.1                | Frontotemporal dementia                                               |
|          | 331.2                | Senile degeneration of brain                                          |
|          | 331.82               | Dementia with Lewy body                                               |
|          | 331.83               | Mild cognitive impairment                                             |
|          | 331.9                | Cerebral degeneration unspecified                                     |
|          | 438                  | Cognitive deficits, late effects of cerebrovascular disease           |
|          | 780.93               | Memory loss                                                           |
|          | F00                  | Dementia in Alzheimer                                                 |
|          | F01                  | Vascular Dementia                                                     |
| F03      | Unspecified dementia |                                                                       |

|                                 |                                                                                       |                                                                                                                                       |
|---------------------------------|---------------------------------------------------------------------------------------|---------------------------------------------------------------------------------------------------------------------------------------|
|                                 | F04                                                                                   | Organic amnesic syndrome not induced alcohol and other psychoactive substances                                                        |
|                                 | G30                                                                                   | Alzheimer's disease                                                                                                                   |
|                                 | G31.*                                                                                 | Other degenerative disease of nervous system, not elsewhere classified (*except G31.2: degeneration of nervous system due to alcohol) |
|                                 | I69.91                                                                                | Cognitive deficits following unspecified cerebrovascular disease                                                                      |
|                                 | R41                                                                                   | Other symptoms and signs involving cognitive functions and awareness                                                                  |
| Venous thromboembolism (DVT/PE) | 415                                                                                   | Acute pulmonary heart disease                                                                                                         |
|                                 | 415.1                                                                                 | Pulmonary embolism and infarction                                                                                                     |
|                                 | 415.11                                                                                | Iatrogenic pulmonary embolism and infarction                                                                                          |
|                                 | 415.12                                                                                | Septic pulmonary embolism                                                                                                             |
|                                 | 415.13                                                                                | Saddle embolus of pulmonary artery                                                                                                    |
|                                 | 415.19                                                                                | Other pulmonary embolism and infarction                                                                                               |
|                                 | 451                                                                                   | Phlebitis and thrombophlebitis                                                                                                        |
|                                 | 451.1                                                                                 | Phlebitis and thrombophlebitis of deep veins of lower extremities                                                                     |
|                                 | 451.11                                                                                | Phlebitis and thrombophlebitis of femoral vein (deep) (superficial)                                                                   |
|                                 | 451.19                                                                                | Phlebitis and thrombophlebitis of deep veins of lower extremities, other                                                              |
|                                 | 451.2                                                                                 | Phlebitis and thrombophlebitis of lower extremities, unspecified                                                                      |
|                                 | 451.81                                                                                | Phlebitis and thrombophlebitis of iliac vein                                                                                          |
|                                 | 451.9                                                                                 | Phlebitis and thrombophlebitis of unspecified site                                                                                    |
|                                 | 453.1                                                                                 | Thrombophlebitis migrans                                                                                                              |
|                                 | 453.2                                                                                 | Other venous embolism and thrombosis of inferior vena cava                                                                            |
|                                 | 453.4                                                                                 | Venous embolism and thrombosis of deep vessels of lower extremity                                                                     |
|                                 | 453.4                                                                                 | Acute venous embolism and thrombosis of unspecified deep vessels of lower extremity                                                   |
|                                 | 453.41                                                                                | Acute venous embolism and thrombosis of deep vessels of proximal lower extremity                                                      |
|                                 | 453.42                                                                                | Acute venous embolism and thrombosis of deep vessels of distal lower extremity                                                        |
|                                 | 453.5                                                                                 | Chronic venous embolism and thrombosis of unspecified deep vessels of lower extremity                                                 |
| 453.5                           | Chronic venous embolism and thrombosis of unspecified deep vessels of lower extremity |                                                                                                                                       |



|         |                                                                                            |
|---------|--------------------------------------------------------------------------------------------|
| 453.51  | Chronic venous embolism and thrombosis of deep vessels of proximal lower extremity         |
| 453.52  | Chronic venous embolism and thrombosis of deep vessels of distal lower extremity           |
| 453.8   | Other venous embolism and thrombosis of other specified veins                              |
| 453.82  | Acute venous embolism and thrombosis of deep veins of upper extremity                      |
| 453.9   | Other venous embolism and thrombosis of unspecified site                                   |
| I26.    | Pulmonary embolism                                                                         |
| I26.0   | Pulmonary embolism with acute cor pulmonale                                                |
| I26.01  | Septic pulmonary embolism with acute cor pulmonale                                         |
| I26.02  | Saddle embolus of pulmonary artery with acute cor pulmonale                                |
| I26.09  | Other pulmonary embolism with acute cor pulmonale                                          |
| I26.9   | Pulmonary embolism without acute cor pulmonale                                             |
| I26.90  | Septic pulmonary embolism without acute cor pulmonale                                      |
| I26.92  | Saddle embolus of pulmonary artery without acute cor pulmonale                             |
| I26.99  | Other pulmonary embolism without acute cor pulmonale                                       |
| I80.1   | Phlebitis and thrombophlebitis of femoral vein                                             |
| I80.10  | Phlebitis and thrombophlebitis of unspecified femoral vein                                 |
| I80.11  | Phlebitis and thrombophlebitis of right femoral vein                                       |
| I80.12  | Phlebitis and thrombophlebitis of left femoral vein                                        |
| I80.13  | Phlebitis and thrombophlebitis of femoral vein, bilateral                                  |
| I80.2   | Phlebitis and thrombophlebitis of other and unspecified deep vessels of lower extremities  |
| I80.20  | Phlebitis and thrombophlebitis of unspecified deep vessels of lower extremities            |
| I80.201 | Phlebitis and thrombophlebitis of unspecified deep vessels of right lower extremity        |
| I80.202 | Phlebitis and thrombophlebitis of unspecified deep vessels of left lower extremity         |
| I80.203 | Phlebitis and thrombophlebitis of unspecified deep vessels of lower extremities, bilateral |
| I80.209 | Phlebitis and thrombophlebitis of unspecified deep vessels of unspecified lower extremity  |
| I80.21  | Phlebitis and thrombophlebitis of iliac vein                                               |
| I80.211 | Phlebitis and thrombophlebitis of right iliac vein                                         |
| I80.212 | Phlebitis and thrombophlebitis of left iliac vein                                          |
| I80.213 | Phlebitis and thrombophlebitis of iliac vein, bilateral                                    |

|         |                                                                                        |
|---------|----------------------------------------------------------------------------------------|
| 180.219 | Phlebitis and thrombophlebitis of unspecified iliac vein                               |
| 180.22  | Phlebitis and thrombophlebitis of popliteal vein                                       |
| 180.221 | Phlebitis and thrombophlebitis of right popliteal vein                                 |
| 180.222 | Phlebitis and thrombophlebitis of left popliteal vein                                  |
| 180.223 | Phlebitis and thrombophlebitis of popliteal vein, bilateral                            |
| 180.229 | Phlebitis and thrombophlebitis of unspecified popliteal vein                           |
| 180.23  | Phlebitis and thrombophlebitis of tibial vein                                          |
| 180.231 | Phlebitis and thrombophlebitis of right tibial vein                                    |
| 180.232 | Phlebitis and thrombophlebitis of left tibial vein                                     |
| 180.233 | Phlebitis and thrombophlebitis of tibial vein, bilateral                               |
| 180.239 | Phlebitis and thrombophlebitis of unspecified tibial vein                              |
| 180.29  | Phlebitis and thrombophlebitis of other deep vessels of lower extremities              |
| 180.291 | Phlebitis and thrombophlebitis of other deep vessels of right lower extremity          |
| 180.292 | Phlebitis and thrombophlebitis of other deep vessels of left lower extremity           |
| 180.293 | Phlebitis and thrombophlebitis of other deep vessels of lower extremity, bilateral     |
| 180.299 | Phlebitis and thrombophlebitis of other deep vessels of unspecified lower extremity    |
| 180.3   | Phlebitis and thrombophlebitis of lower extremities, unspecified                       |
| 180.8   | Phlebitis and thrombophlebitis of other sites                                          |
| 180.9   | Phlebitis and thrombophlebitis of unspecified site                                     |
| 182.1   | Thrombophlebitis migrans                                                               |
| 182.22  | Embolism and thrombosis of inferior vena cava                                          |
| 182.220 | Acute embolism and thrombosis of inferior vena cava                                    |
| 182.221 | Chronic embolism and thrombosis of inferior vena cava                                  |
| 182.4   | Acute embolism and thrombosis of deep veins of lower extremity                         |
| 182.40  | Acute embolism and thrombosis of unspecified deep veins of lower extremity             |
| 182.401 | Acute embolism and thrombosis of unspecified deep veins of right lower extremity       |
| 182.402 | Acute embolism and thrombosis of unspecified deep veins of left lower extremity        |
| 182.403 | Acute embolism and thrombosis of unspecified deep veins of lower extremity, bilateral  |
| 182.409 | Acute embolism and thrombosis of unspecified deep veins of unspecified lower extremity |
| 182.41  | Acute embolism and thrombosis of femoral vein                                          |

|         |                                                                                                 |
|---------|-------------------------------------------------------------------------------------------------|
| I82.411 | Acute embolism and thrombosis of right femoral vein                                             |
| I82.412 | Acute embolism and thrombosis of left femoral vein                                              |
| I82.413 | Acute embolism and thrombosis of femoral vein, bilateral                                        |
| I82.419 | Acute embolism and thrombosis of unspecified femoral vein                                       |
| I82.42  | Acute embolism and thrombosis of iliac vein                                                     |
| I82.421 | Acute embolism and thrombosis of right iliac vein                                               |
| I82.422 | Acute embolism and thrombosis of left iliac vein                                                |
| I82.423 | Acute embolism and thrombosis of iliac vein, bilateral                                          |
| I82.429 | Acute embolism and thrombosis of unspecified iliac vein                                         |
| I82.43  | Acute embolism and thrombosis of popliteal vein                                                 |
| I82.431 | Acute embolism and thrombosis of right popliteal vein                                           |
| I82.432 | Acute embolism and thrombosis of left popliteal vein                                            |
| I82.433 | Acute embolism and thrombosis of popliteal vein, bilateral                                      |
| I82.439 | Acute embolism and thrombosis of unspecified popliteal vein                                     |
| I82.44  | Acute embolism and thrombosis of tibial vein                                                    |
| I82.441 | Acute embolism and thrombosis of right tibial vein                                              |
| I82.442 | Acute embolism and thrombosis of left tibial vein                                               |
| I82.443 | Acute embolism and thrombosis of tibial vein, bilateral                                         |
| I82.449 | Acute embolism and thrombosis of unspecified tibial vein                                        |
| I82.49  | Acute embolism and thrombosis of other specified deep vein of lower extremity                   |
| I82.491 | Acute embolism and thrombosis of other specified deep vein of right lower extremity             |
| I82.492 | Acute embolism and thrombosis of other specified deep vein of left lower extremity              |
| I82.493 | Acute embolism and thrombosis of other specified deep vein of lower extremity, bilateral        |
| I82.499 | Acute embolism and thrombosis of other specified deep vein of unspecified lower extremity       |
| I82.4Y  | Acute embolism and thrombosis of unspecified deep veins of proximal lower extremity             |
| I82.4Y1 | Acute embolism and thrombosis of unspecified deep veins of right proximal lower extremity       |
| I82.4Y2 | Acute embolism and thrombosis of unspecified deep veins of left proximal lower extremity        |
| I82.4Y3 | Acute embolism and thrombosis of unspecified deep veins of proximal lower extremity, bilateral  |
| I82.4Y9 | Acute embolism and thrombosis of unspecified deep veins of unspecified proximal lower extremity |

|         |                                                                                               |
|---------|-----------------------------------------------------------------------------------------------|
| I82.4Z  | Acute embolism and thrombosis of unspecified deep veins of distal lower extremity             |
| I82.4Z1 | Acute embolism and thrombosis of unspecified deep veins of right distal lower extremity       |
| I82.4Z2 | Acute embolism and thrombosis of unspecified deep veins of left distal lower extremity        |
| I82.4Z3 | Acute embolism and thrombosis of unspecified deep veins of distal lower extremity, bilateral  |
| I82.4Z9 | Acute embolism and thrombosis of unspecified deep veins of unspecified distal lower extremity |
| I82.5   | Chronic embolism and thrombosis of deep veins of lower extremity                              |
| I82.50  | Chronic embolism and thrombosis of unspecified deep veins of lower extremity                  |
| I82.501 | Chronic embolism and thrombosis of unspecified deep veins of right lower extremity            |
| I82.502 | Chronic embolism and thrombosis of unspecified deep veins of left lower extremity             |
| I82.503 | Chronic embolism and thrombosis of unspecified deep veins of lower extremity, bilateral       |
| I82.509 | Chronic embolism and thrombosis of unspecified deep veins of unspecified lower extremity      |
| I82.51  | Chronic embolism and thrombosis of femoral vein                                               |
| I82.511 | Chronic embolism and thrombosis of right femoral vein                                         |
| I82.512 | Chronic embolism and thrombosis of left femoral vein                                          |
| I82.513 | Chronic embolism and thrombosis of femoral vein, bilateral                                    |
| I82.519 | Chronic embolism and thrombosis of unspecified femoral vein                                   |
| I82.52  | Chronic embolism and thrombosis of iliac vein                                                 |
| I82.521 | Chronic embolism and thrombosis of right iliac vein                                           |
| I82.522 | Chronic embolism and thrombosis of left iliac vein                                            |
| I82.523 | Chronic embolism and thrombosis of iliac vein, bilateral                                      |
| I82.529 | Chronic embolism and thrombosis of unspecified iliac vein                                     |
| I82.53  | Chronic embolism and thrombosis of popliteal vein                                             |
| I82.531 | Chronic embolism and thrombosis of right popliteal vein                                       |
| I82.532 | Chronic embolism and thrombosis of left popliteal vein                                        |
| I82.533 | Chronic embolism and thrombosis of popliteal vein, bilateral                                  |
| I82.539 | Chronic embolism and thrombosis of unspecified popliteal vein                                 |
| I82.54  | Chronic embolism and thrombosis of tibial vein                                                |
| I82.541 | Chronic embolism and thrombosis of right tibial vein                                          |

|         |                                                                                                   |
|---------|---------------------------------------------------------------------------------------------------|
| I82.542 | Chronic embolism and thrombosis of left tibial vein                                               |
| I82.543 | Chronic embolism and thrombosis of tibial vein, bilateral                                         |
| I82.549 | Chronic embolism and thrombosis of unspecified tibial vein                                        |
| I82.59  | Chronic embolism and thrombosis of other specified deep vein of lower extremity                   |
| I82.591 | Chronic embolism and thrombosis of other specified deep vein of right lower extremity             |
| I82.592 | Chronic embolism and thrombosis of other specified deep vein of left lower extremity              |
| I82.593 | Chronic embolism and thrombosis of other specified deep vein of lower extremity, bilateral        |
| I82.599 | Chronic embolism and thrombosis of other specified deep vein of unspecified lower extremity       |
| I82.5Y  | Chronic embolism and thrombosis of unspecified deep veins of proximal lower extremity             |
| I82.5Y1 | Chronic embolism and thrombosis of unspecified deep veins of right proximal lower extremity       |
| I82.5Y2 | Chronic embolism and thrombosis of unspecified deep veins of left proximal lower extremity        |
| I82.5Y3 | Chronic embolism and thrombosis of unspecified deep veins of proximal lower extremity, bilateral  |
| I82.5Y9 | Chronic embolism and thrombosis of unspecified deep veins of unspecified proximal lower extremity |
| I82.5Z  | Chronic embolism and thrombosis of unspecified deep veins of distal lower extremity               |
| I82.5Z1 | Chronic embolism and thrombosis of unspecified deep veins of right distal lower extremity         |
| I82.5Z2 | Chronic embolism and thrombosis of unspecified deep veins of left distal lower extremity          |
| I82.5Z3 | Chronic embolism and thrombosis of unspecified deep veins of distal lower extremity, bilateral    |
| I82.5Z9 | Chronic embolism and thrombosis of unspecified deep veins of unspecified distal lower extremity   |
| I82.9   | Embolism and thrombosis of unspecified vein                                                       |
| I82.90  | Acute embolism and thrombosis of unspecified vein                                                 |
| I82.91  | Chronic embolism and thrombosis of unspecified vein                                               |

**Supplemental Table V**

| <b>Number of Non-CVD Events by CAC Group</b> |              |                  |                    |                   |
|----------------------------------------------|--------------|------------------|--------------------|-------------------|
| <b>Event Type</b>                            | <b>CAC 0</b> | <b>CAC 1-399</b> | <b>CAC 400-999</b> | <b>CAC ≥ 1000</b> |
| <b>Cancer</b>                                | 363          | 456              | 93                 | 83                |
| <b>CKD</b>                                   | 258          | 384              | 81                 | 73                |
| <b>Pneumonia</b>                             | 168          | 221              | 58                 | 49                |
| <b>COPD</b>                                  | 93           | 146              | 31                 | 27                |
| <b>VTE</b>                                   | 102          | 121              | 17                 | 17                |
| <b>Dementia</b>                              | 99           | 218              | 53                 | 45                |
| <b>Hip Fracture</b>                          | 17           | 50               | 10                 | 9                 |
| <b>Aggregate Non-CVD</b>                     | 563          | 822              | 173                | 144               |

### Supplemental Table VI

| <b>FOURIER Subgroup</b>      | <b>% of FOURIER placebo arm</b> | <b>3-year KM rate as reported by FOURIER</b> | <b>Annualized event rate</b> |
|------------------------------|---------------------------------|----------------------------------------------|------------------------------|
| <b>Only 1 prior MI</b>       | 76.5%                           | 8.2                                          | 2.7                          |
| <b>No multivessel CAD</b>    | 74.9%                           | 8.9                                          | 3.0                          |
| <b>No high-risk features</b> | 74.5%                           | 7.8                                          | 2.6                          |

Note: There were a total of 13,780 patients in the placebo arm of the FOURIER trial. However, only 11,196 had 3-point MACE data on these low-risk subgroups. No high-risk features is defined as no multivessel CAD, only 1 prior MI, and prior MI  $\geq$  2 years ago. 3-point MACE is defined as CV death, MI, or stroke, which was the secondary outcome of the FOURIER trial.

## Supplemental Table VII

| <b>P-Value and Number of Events By Years of Follow-up Time</b> |          |          |          |          |              |
|----------------------------------------------------------------|----------|----------|----------|----------|--------------|
| <b>Follow-up Time (years)</b>                                  | <b>5</b> | <b>6</b> | <b>7</b> | <b>8</b> | <b>17.5*</b> |
| <b>CAC 400-999</b>                                             | 50       | 60       | 64       | 69       | 109          |
| <b>CAC <math>\geq</math> 1000</b>                              | 39       | 46       | 54       | 61       | 90           |
| <b>p-value for logrank</b>                                     | 0.18     | 0.16     | 0.04     | 0.01     | 0.002        |

\*Denotes full follow-up time used in our paper



## Supplemental Table VIII

### Hazard Ratios for CVD Events and All-Cause Mortality for CAC $\geq$ 1000 Participants by Number of ECC Sites

#### Model 1 - Unadjusted HRs

| # ECC Sites | CVD Event Type and All-cause Mortality, HR (95% CI) |                     |                     |                     |                     |
|-------------|-----------------------------------------------------|---------------------|---------------------|---------------------|---------------------|
|             | All CVD                                             | Hard CVD            | All CHD             | Hard CHD            | All-cause mortality |
| 0           | REF                                                 | REF                 | REF                 | REF                 | REF                 |
| 1           | 1.57 (0.67 - 3.69)                                  | 2.53 (0.57 - 11.31) | 3.39 (1.01 - 11.42) | 2.29 (0.51 - 10.34) | 1.24 (0.49 - 3.12)  |
| 2           | 1.54 (0.67 - 3.57)                                  | 2.83 (0.65 - 12.40) | 2.49 (0.73 - 8.48)  | 2.28 (0.51 - 10.18) | 2.07 (0.87 - 4.92)  |
| 3           | 1.89 (0.84 - 4.25)                                  | 4.28 (1.02 - 17.94) | 3.69 (1.13 - 12.10) | 3.51 (0.83 - 14.87) | 2.45 (1.05 - 5.72)  |
| 4           | 1.93 (0.83 - 4.51)                                  | 3.61 (0.82 - 15.95) | 2.98 (0.86 - 10.28) | 2.42 (0.52 - 11.26) | 3.76 (1.60 - 8.86)  |

#### Model 2 - Adjusted\* HRs

| # ECC Sites | CVD Event Type and All-cause Mortality, HR (95% CI) |                     |                     |                     |                     |
|-------------|-----------------------------------------------------|---------------------|---------------------|---------------------|---------------------|
|             | All CVD                                             | Hard CVD            | All CHD             | Hard CHD            | All-cause mortality |
| 0           | REF                                                 | REF                 | REF                 | REF                 | REF                 |
| 1           | 1.51 (0.63 - 3.62)                                  | 2.13 (0.47 - 9.70)  | 3.58 (1.04 - 12.32) | 2.00 (0.43 - 9.23)  | 0.91 (0.36 - 2.32)  |
| 2           | 1.46 (0.61 - 3.50)                                  | 2.22 (0.49 - 10.08) | 2.73 (0.78 - 9.62)  | 1.87 (0.40 - 8.74)  | 1.37 (0.56 - 3.36)  |
| 3           | 1.78 (0.76 - 4.18)                                  | 3.58 (0.82 - 15.61) | 4.09 (1.20 - 13.91) | 3.16 (0.71 - 14.03) | 1.61 (0.67 - 3.86)  |
| 4           | 1.73 (0.70 - 4.30)                                  | 2.77 (0.59 - 12.99) | 3.23 (0.88 - 11.81) | 1.92 (0.39 - 9.55)  | 1.98 (0.80 - 4.88)  |

\*Adjusted on age, sex, race/ethnicity

# Supplemental Figure I

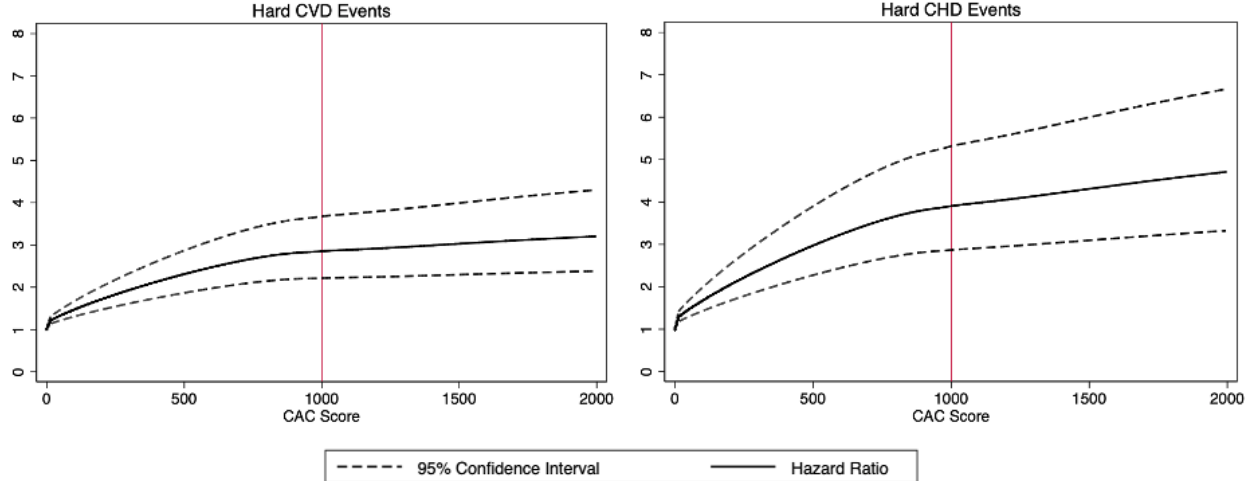

Note: Hard CVD is equivalent to the Pooled Cohort Equations definition of ASCVD

Supplemental Figure II

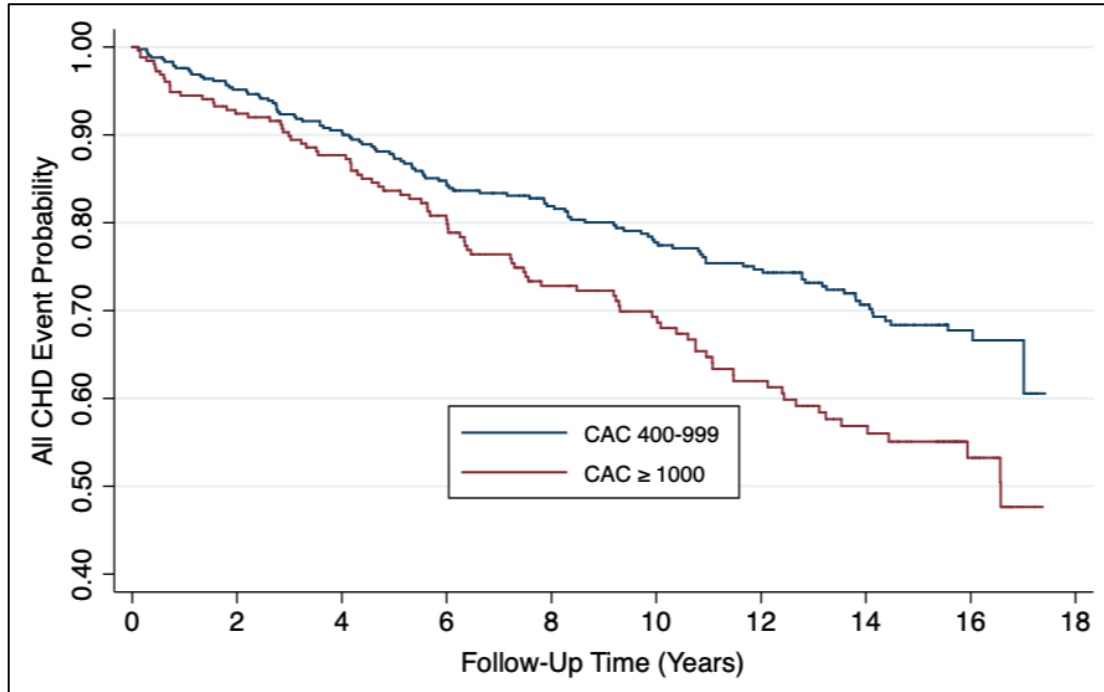

Supplemental Figure III

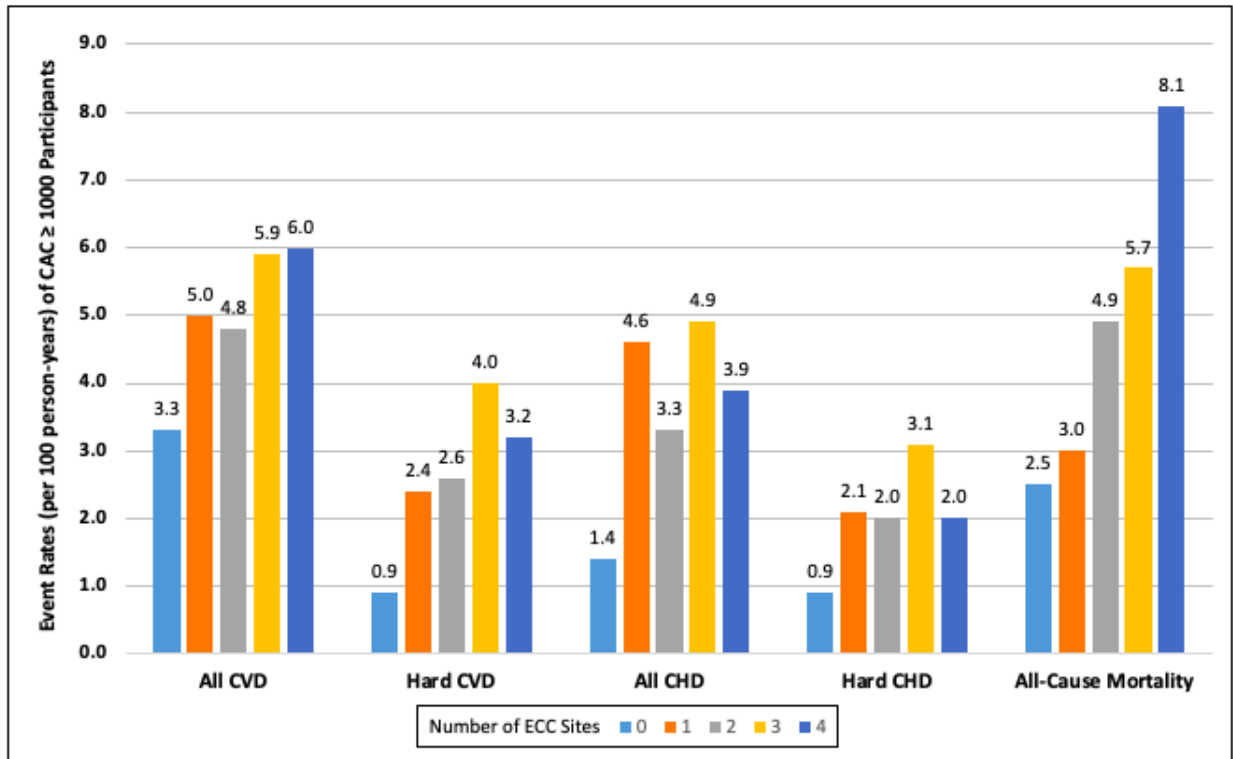

Supplement: NIHMS1680576-supplement-Supplemental_Material_-_Clean.pdf [file NIHMS1680576-supplement-Supplemental_Material_-_Clean.pdf]
